# Supplementary material for: Ice core nitrogen isotopes archive dramatic changes in West Antarctic Ice Sheet thinning
Source: Copernicus journal article supplement (doi:10.5194/egusphere-2025-3305), 2025-07-17
Supplement: Supplementary file 1 [file All_data_for_publication.xlsx]

## Sheet: Skytrain isotopes
Gas Age (yr)	15N (per mil)	sigma 15N (per mil)	Ar40/4 (per mil)	N Excess (per mil)	O2/N2 (per mil)
5836	0.195	0.012	0.179	-0.0161593	-7.76537
5905	0.194	0.018	0.176	-0.018334	-4.33762
5965	0.185	0.011	0.183	-0.00166346	-0.5208
6021	0.194	0.014	0.164	-0.02972	-10.8282
6100	0.198	0.01	0.172	-0.0256091	-6.94473
6124	0.192	0.018	0.16	-0.0317359	-6.83322
6160	0.182	0.01	0.173	-0.0088574	-6.7854
6202	0.199	0.014	0.18	-0.0192588	-7.92566
6226	0.202	0.018	0.192	-0.00998957	-2.73642
6266	0.19	0.016	0.174	-0.0163899	-5.28622
6295	0.193	0.013	0.183	-0.00999819	-2.94187
6344	0.22	0.012	0.218	-0.00166371	-5.07882
6382	0.211	0.019	0.205	-0.00555748	-4.78823
6418	0.196	0.015	0.19	-0.00592304	-1.53699
6453	0.217	0.014	0.218	0.00070432	-3.05508
6495	0.208	0.015	0.187	-0.0211555	-7.00403
6538	0.195	0.01	0.149	-0.0462617	-2.69851
6576	0.232	0.017	0.202	-0.0304324	-8.90944
6616	0.209	0.015	0.191	-0.0175274	-3.65018
6652	0.224	0.017	0.196	-0.0276415	-7.35118
6696	0.211	0.01	0.192	-0.0186819	-7.05186
6735	0.211	0.016	0.193	-0.0176876	-9.87472
6778	0.215	0.012	0.208	-0.00676597	-4.81669
6814	0.215	0.013	0.199	-0.0163194	-5.39308
6857	0.189	0.016	0.18	-0.00930239	-3.53599
6900	0.223	0.012	0.189	-0.0339463	-11.6143
6944	0.172	0.016	0.156	-0.0164947	1.42032
7012	0.22	0.019	0.184	-0.0363814	-8.77087
7036	0.177	0.011	0.122	-0.0547675	-9.57196
7067	0.183	0.006	0.167	-0.0160883	-2.04573
7121	0.183	0.014	0.152	-0.0305819	-8.4912
7162	0.184	0.018	0.164	-0.0198419	-6.38653
7223	0.181	0.018	0.166	-0.0148052	-4.83047
7247	0.16	0.015	0.128	-0.0316191	-3.15265
7287	0.153	0.018	0.12	-0.0332628	-7.51668
7331	0.153	0.014	0.094	-0.0589066	-15.6419
7380	0.118	0.014	0.075	-0.0430623	-12.5793
7423	0.127	0.01	0.095	-0.0318048	-8.40683
7464	0.116	0.018	0.083	-0.0329949	-3.60362
7507	0.15	0.013	0.109	-0.0412587	-7.94592
7560	0.131	0.01	0.075	-0.0562675	-10.9455
7601	0.161	0.01	0.117	-0.0438773	-12.1232
7647	0.154	0.018	0.136	-0.0183805	-6.01853
7689	0.129	0.01	0.095	-0.0335009	-8.27873
7733	0.134	0.016	0.075	-0.0587673	-9.72611
7777	0.169	0.014	0.129	-0.0404496	-5.82986
7828	0.172	0.011	0.14	-0.0319864	-10.287
7859	0.19	0.011	0.186	-0.00400808	-4.52031
7894	0.212	0.01	0.172	-0.039667	-15.0949
7937	0.209	0.018	0.199	-0.00981842	-6.2147
7977	0.207	0.015	0.18	-0.02707	-4.277
8019	0.21	0.011	0.194	-0.0164417	-2.50167
8064	0.227	0.012	0.196	-0.0307663	-2.09706
8138	0.216	0.013	0.198	-0.0182062	-2.3152
8178	0.207	0.01	0.188	-0.0187929	-6.23733
8236	0.206	0.01	0.186	-0.0200139	-4.17948
8308	0.196	0.018	0.172	-0.0235196	-9.0221
8370	0.207	0.012	0.171	-0.0363702	-4.83922
8504	0.208	0.014	0.19	-0.0177093	-6.93874
8547	0.192	0.014	0.156	-0.0355509	-7.13016

## Sheet: Skytrain Splines
ST 15N Spline Age (yr BP)	ST 15N Spline (per mil)	ST 15N Spline Error (per mil)	ST 40Ar/4 Spline Age (yr BP)	ST 40Ar/4 Spline (per mil)	ST 40Ar/4 Spline Error (per mil)	ST O2/N2 Spline Age (yr BP)	ST O2/N2 Spline (per mil)	ST O2/N2 Spline Error (per mil)	ST Nexcess Spline Age (yr BP)	ST Nexcess Spline (per mil)	ST Nexcess Spline Error (per mil)
8550	0.198554	0.0260134	8550	0.169308	0.0577509	8550	-7.19942	2.82528	8500	-0.0283421	0.00737173
8549	0.198588	0.0258884	8549	0.169353	0.0574872	8549	-7.19403	2.8097	8499	-0.0283291	0.00734325
8548	0.198623	0.0257639	8548	0.169398	0.0572251	8548	-7.18864	2.79426	8498	-0.0283162	0.00731484
8547	0.198657	0.0256401	8547	0.169443	0.0569645	8547	-7.18325	2.77896	8497	-0.0283033	0.00728651
8546	0.198691	0.0255168	8546	0.169488	0.0567055	8546	-7.17787	2.7638	8496	-0.0282905	0.00725825
8545	0.198725	0.0253942	8545	0.169534	0.0564482	8545	-7.17249	2.74878	8495	-0.0282778	0.00723007
8544	0.198759	0.0252721	8544	0.169579	0.0561924	8544	-7.16712	2.7339	8494	-0.0282651	0.00720196
8543	0.198793	0.0251505	8543	0.169624	0.0559381	8543	-7.16175	2.71916	8493	-0.0282525	0.00717393
8542	0.198827	0.0250296	8542	0.169669	0.0556855	8542	-7.15638	2.70455	8492	-0.02824	0.00714598
8541	0.198861	0.0249092	8541	0.169715	0.0554345	8541	-7.15102	2.69008	8491	-0.0282275	0.0071181
8540	0.198895	0.0247894	8540	0.16976	0.055185	8540	-7.14566	2.67575	8490	-0.028215	0.00709031
8539	0.198929	0.0246702	8539	0.169806	0.0549371	8539	-7.14031	2.66155	8489	-0.0282026	0.00706259
8538	0.198963	0.0245515	8538	0.169851	0.0546908	8538	-7.13496	2.64749	8488	-0.0281903	0.00703495
8537	0.198997	0.0244335	8537	0.169896	0.054446	8537	-7.12961	2.63356	8487	-0.028178	0.00700739
8536	0.199031	0.024316	8536	0.169942	0.0542029	8536	-7.12427	2.61977	8486	-0.0281657	0.00697992
8535	0.199064	0.024199	8535	0.169987	0.0539613	8535	-7.11893	2.6061	8485	-0.0281535	0.00695252
8534	0.199098	0.0240826	8534	0.170033	0.0537213	8534	-7.11359	2.59257	8484	-0.0281413	0.00692521
8533	0.199131	0.0239668	8533	0.170078	0.0534828	8533	-7.10825	2.57917	8483	-0.0281291	0.00689797
8532	0.199165	0.0238516	8532	0.170123	0.0532459	8532	-7.10292	2.5659	8482	-0.028117	0.00687083
8531	0.199198	0.0237369	8531	0.170169	0.0530106	8531	-7.09759	2.55276	8481	-0.0281049	0.00684376
8530	0.199232	0.0236228	8530	0.170214	0.0527769	8530	-7.09227	2.53975	8480	-0.0280928	0.00681678
8529	0.199265	0.0235093	8529	0.170259	0.0525447	8529	-7.08694	2.52687	8479	-0.0280807	0.00678989
8528	0.199298	0.0233963	8528	0.170304	0.0523141	8528	-7.08162	2.51412	8478	-0.0280687	0.00676308
8527	0.199331	0.0232839	8527	0.17035	0.052085	8527	-7.0763	2.50149	8477	-0.0280567	0.00673635
8526	0.199364	0.023172	8526	0.170395	0.0518576	8526	-7.07098	2.48899	8476	-0.0280447	0.00670972
8525	0.199397	0.0230608	8525	0.17044	0.0516316	8525	-7.06567	2.47662	8475	-0.0280327	0.00668317
8524	0.19943	0.02295	8524	0.170484	0.0514072	8524	-7.06036	2.46437	8474	-0.0280207	0.00665671
8523	0.199463	0.0228398	8523	0.170529	0.0511844	8523	-7.05504	2.45225	8473	-0.0280087	0.00663034
8522	0.199496	0.0227302	8522	0.170574	0.0509631	8522	-7.04973	2.44025	8472	-0.0279968	0.00660406
8521	0.199528	0.0226212	8521	0.170619	0.0507434	8521	-7.04442	2.42838	8471	-0.0279848	0.00657787
8520	0.199561	0.0225126	8520	0.170663	0.0505252	8520	-7.03912	2.41662	8470	-0.0279729	0.00655177
8519	0.199593	0.0224047	8519	0.170708	0.0503086	8519	-7.03381	2.40499	8469	-0.0279609	0.00652576
8518	0.199625	0.0222973	8518	0.170752	0.0500935	8518	-7.02851	2.39348	8468	-0.027949	0.00649985
8517	0.199658	0.0221904	8517	0.170796	0.0498799	8517	-7.0232	2.38209	8467	-0.027937	0.00647403
8516	0.19969	0.0220841	8516	0.17084	0.0496679	8516	-7.0179	2.37082	8466	-0.027925	0.0064483
8515	0.199722	0.0219784	8515	0.170884	0.0494574	8515	-7.0126	2.35967	8465	-0.027913	0.00642266
8514	0.199754	0.0218732	8514	0.170928	0.0492484	8514	-7.0073	2.34864	8464	-0.027901	0.00639712
8513	0.199785	0.0217685	8513	0.170972	0.049041	8513	-7.002	2.33773	8463	-0.027889	0.00637167
8512	0.199817	0.0216644	8512	0.171016	0.048835	8512	-6.9967	2.32693	8462	-0.027877	0.00634632
8511	0.199848	0.0215608	8511	0.171059	0.0486306	8511	-6.9914	2.31625	8461	-0.0278649	0.00632107
8510	0.19988	0.0214578	8510	0.171102	0.0484277	8510	-6.9861	2.30569	8460	-0.0278528	0.00629591
8509	0.199911	0.0213553	8509	0.171145	0.0482263	8509	-6.9808	2.29524	8459	-0.0278407	0.00627085
8508	0.199942	0.0212534	8508	0.171188	0.0480264	8508	-6.9755	2.2849	8458	-0.0278286	0.00624589
8507	0.199973	0.021152	8507	0.171231	0.047828	8507	-6.9702	2.27468	8457	-0.0278164	0.00622103
8506	0.200004	0.0210511	8506	0.171274	0.0476311	8506	-6.9649	2.26457	8456	-0.0278042	0.00619626
8505	0.200035	0.0209508	8505	0.171316	0.0474357	8505	-6.9596	2.25458	8455	-0.027792	0.00617159
8504	0.200065	0.020851	8504	0.171358	0.0472418	8504	-6.9543	2.24469	8454	-0.0277797	0.00614703
8503	0.200096	0.0207517	8503	0.1714	0.0470493	8503	-6.949	2.23492	8453	-0.0277674	0.00612256
8502	0.200126	0.020653	8502	0.171442	0.0468584	8502	-6.9437	2.22526	8452	-0.0277551	0.00609819
8501	0.200156	0.0205548	8501	0.171484	0.0466689	8501	-6.9384	2.21571	8451	-0.0277426	0.00607392
8500	0.200186	0.0204571	8500	0.171525	0.0464808	8500	-6.93309	2.20626	8450	-0.0277302	0.00604976
8499	0.200216	0.02036	8499	0.171567	0.0462943	8499	-6.92779	2.19693	8449	-0.0277177	0.00602569
8498	0.200246	0.0202634	8498	0.171608	0.0461092	8498	-6.92249	2.1877	8448	-0.0277051	0.00600173
8497	0.200275	0.0201673	8497	0.171649	0.0459255	8497	-6.91718	2.17858	8447	-0.0276925	0.00597787
8496	0.200305	0.0200717	8496	0.17169	0.0457434	8496	-6.91187	2.16956	8446	-0.0276799	0.00595411
8495	0.200334	0.0199767	8495	0.17173	0.0455626	8495	-6.90656	2.16065	8445	-0.0276671	0.00593045
8494	0.200363	0.0198822	8494	0.171771	0.0453833	8494	-6.90125	2.15185	8444	-0.0276543	0.00590689
8493	0.200392	0.0197882	8493	0.171811	0.0452055	8493	-6.89594	2.14315	8443	-0.0276415	0.00588344
8492	0.200421	0.0196947	8492	0.171851	0.0450291	8492	-6.89062	2.13455	8442	-0.0276286	0.00586009
8491	0.20045	0.0196018	8491	0.171891	0.0448542	8491	-6.8853	2.12606	8441	-0.0276156	0.00583684
8490	0.200479	0.0195094	8490	0.171931	0.0446806	8490	-6.87998	2.11767	8440	-0.0276025	0.00581369
8489	0.200507	0.0194175	8489	0.171971	0.0445085	8489	-6.87466	2.10937	8439	-0.0275893	0.00579064
8488	0.200536	0.0193261	8488	0.17201	0.0443379	8488	-6.86934	2.10118	8438	-0.0275761	0.0057677
8487	0.200564	0.0192352	8487	0.17205	0.0441687	8487	-6.86401	2.09309	8437	-0.0275628	0.00574486
8486	0.200593	0.0191448	8486	0.172089	0.0440008	8486	-6.85868	2.0851	8436	-0.0275494	0.00572212
8485	0.200621	0.019055	8485	0.172128	0.0438345	8485	-6.85335	2.07721	8435	-0.027536	0.00569948
8484	0.200649	0.0189657	8484	0.172167	0.0436695	8484	-6.84801	2.06942	8434	-0.0275224	0.00567695
8483	0.200677	0.0188768	8483	0.172206	0.0435059	8483	-6.84267	2.06172	8433	-0.0275088	0.00565451
8482	0.200705	0.0187885	8482	0.172245	0.0433438	8482	-6.83733	2.05412	8432	-0.027495	0.00563218
8481	0.200732	0.0187007	8481	0.172284	0.043183	8481	-6.83199	2.04661	8431	-0.0274812	0.00560995
8480	0.20076	0.0186134	8480	0.172323	0.0430237	8480	-6.82664	2.0392	8430	-0.0274672	0.00558782
8479	0.200787	0.0185266	8479	0.172361	0.0428657	8479	-6.82128	2.03188	8429	-0.0274532	0.00556579
8478	0.200815	0.0184404	8478	0.1724	0.0427091	8478	-6.81593	2.02466	8428	-0.0274391	0.00554386
8477	0.200842	0.0183546	8477	0.172438	0.042554	8477	-6.81057	2.01753	8427	-0.0274248	0.00552202
8476	0.200869	0.0182693	8476	0.172476	0.0424002	8476	-6.8052	2.01049	8426	-0.0274105	0.00550029
8475	0.200896	0.0181846	8475	0.172515	0.0422478	8475	-6.79984	2.00355	8425	-0.027396	0.00547865
8474	0.200924	0.0181003	8474	0.172553	0.0420968	8474	-6.79446	1.99669	8424	-0.0273815	0.00545712
8473	0.20095	0.0180166	8473	0.172591	0.0419471	8473	-6.78909	1.98993	8423	-0.0273668	0.00543567
8472	0.200977	0.0179333	8472	0.172629	0.0417989	8472	-6.78371	1.98325	8422	-0.027352	0.00541433
8471	0.201004	0.0178506	8471	0.172667	0.041652	8471	-6.77832	1.97666	8421	-0.027337	0.00539308
8470	0.201031	0.0177683	8470	0.172705	0.0415064	8470	-6.77293	1.97016	8420	-0.027322	0.00537192
8469	0.201057	0.0176865	8469	0.172742	0.0413622	8469	-6.76753	1.96375	8419	-0.0273068	0.00535086
8468	0.201084	0.0176053	8468	0.17278	0.0412194	8468	-6.76213	1.95742	8418	-0.0272915	0.00532989
8467	0.20111	0.0175245	8467	0.172818	0.0410779	8467	-6.75673	1.95118	8417	-0.0272761	0.00530902
8466	0.201137	0.0174442	8466	0.172856	0.0409378	8466	-6.75131	1.94503	8416	-0.0272605	0.00528823
8465	0.201163	0.0173645	8465	0.172893	0.040799	8465	-6.7459	1.93895	8415	-0.0272449	0.00526754
8464	0.201189	0.0172852	8464	0.172931	0.0406615	8464	-6.74047	1.93297	8414	-0.027229	0.00524693
8463	0.201215	0.0172064	8463	0.172968	0.0405254	8463	-6.73505	1.92706	8413	-0.0272131	0.00522641
8462	0.201241	0.0171281	8462	0.173006	0.0403906	8462	-6.72961	1.92124	8412	-0.0271969	0.00520598
8461	0.201267	0.0170503	8461	0.173043	0.0402571	8461	-6.72417	1.91549	8411	-0.0271807	0.00518563
8460	0.201293	0.016973	8460	0.173081	0.040125	8460	-6.71873	1.90983	8410	-0.0271643	0.00516537
8459	0.201319	0.0168961	8459	0.173118	0.0399941	8459	-6.71327	1.90425	8409	-0.0271477	0.00514519
8458	0.201345	0.0168198	8458	0.173156	0.0398646	8458	-6.70782	1.89875	8408	-0.027131	0.00512509
8457	0.201371	0.0167439	8457	0.173193	0.0397363	8457	-6.70235	1.89332	8407	-0.0271142	0.00510507
8456	0.201396	0.0166685	8456	0.173231	0.0396094	8456	-6.69688	1.88797	8406	-0.0270971	0.00508513
8455	0.201422	0.0165936	8455	0.173268	0.0394837	8455	-6.6914	1.8827	8405	-0.02708	0.00506527
8454	0.201448	0.0165192	8454	0.173306	0.0393593	8454	-6.68592	1.8775	8404	-0.0270626	0.00504548
8453	0.201473	0.0164453	8453	0.173343	0.0392362	8453	-6.68042	1.87238	8403	-0.0270451	0.00502577
8452	0.201499	0.0163719	8452	0.173381	0.0391144	8452	-6.67493	1.86734	8402	-0.0270275	0.00500613
8451	0.201524	0.0162989	8451	0.173418	0.0389938	8451	-6.66942	1.86237	8401	-0.0270096	0.00498656
8450	0.201549	0.0162264	8450	0.173456	0.0388745	8450	-6.66391	1.85747	8400	-0.0269916	0.00496706
8449	0.201575	0.0161544	8449	0.173493	0.0387565	8449	-6.65838	1.85264	8399	-0.0269734	0.00494763
8448	0.2016	0.0160828	8448	0.173531	0.0386397	8448	-6.65286	1.84788	8398	-0.0269551	0.00492826
8447	0.201625	0.0160118	8447	0.173569	0.0385241	8447	-6.64732	1.84319	8397	-0.0269365	0.00490895
8446	0.20165	0.0159412	8446	0.173606	0.0384098	8446	-6.64177	1.83858	8396	-0.0269178	0.00488971
8445	0.201675	0.015871	8445	0.173644	0.0382967	8445	-6.63622	1.83403	8395	-0.0268989	0.00487053
8444	0.201701	0.0158014	8444	0.173682	0.0381848	8444	-6.63066	1.82955	8394	-0.0268798	0.0048514
8443	0.201726	0.0157322	8443	0.173719	0.0380741	8443	-6.62509	1.82514	8393	-0.0268605	0.00483233
8442	0.201751	0.0156635	8442	0.173757	0.0379646	8442	-6.61952	1.82079	8392	-0.0268411	0.00481332
8441	0.201776	0.0155952	8441	0.173795	0.0378564	8441	-6.61393	1.81651	8391	-0.0268214	0.00479435
8440	0.201801	0.0155274	8440	0.173833	0.0377493	8440	-6.60834	1.8123	8390	-0.0268015	0.00477544
8439	0.201825	0.0154601	8439	0.173871	0.0376434	8439	-6.60273	1.80815	8389	-0.0267815	0.00475657
8438	0.20185	0.0153932	8438	0.173909	0.0375386	8438	-6.59712	1.80406	8388	-0.0267612	0.00473774
8437	0.201875	0.0153268	8437	0.173948	0.0374351	8437	-6.5915	1.80004	8387	-0.0267408	0.00471896
8436	0.2019	0.0152609	8436	0.173986	0.0373327	8436	-6.58587	1.79607	8386	-0.0267201	0.00470022
8435	0.201925	0.0151954	8435	0.174024	0.0372314	8435	-6.58023	1.79217	8385	-0.0266992	0.00468152
8434	0.20195	0.0151303	8434	0.174063	0.0371313	8434	-6.57458	1.78833	8384	-0.0266781	0.00466285
8433	0.201974	0.0150657	8433	0.174101	0.0370323	8433	-6.56892	1.78455	8383	-0.0266568	0.00464421
8432	0.201999	0.0150016	8432	0.17414	0.0369344	8432	-6.56325	1.78082	8382	-0.0266353	0.00462561
8431	0.202024	0.0149379	8431	0.174178	0.0368376	8431	-6.55758	1.77716	8381	-0.0266136	0.00460703
8430	0.202049	0.0148747	8430	0.174217	0.036742	8430	-6.55189	1.77355	8380	-0.0265916	0.00458848
8429	0.202073	0.0148119	8429	0.174256	0.0366474	8429	-6.54619	1.77	8379	-0.0265694	0.00456995
8428	0.202098	0.0147496	8428	0.174295	0.0365539	8428	-6.54048	1.7665	8378	-0.026547	0.00455144
8427	0.202123	0.0146877	8427	0.174334	0.0364615	8427	-6.53477	1.76305	8377	-0.0265244	0.00453295
8426	0.202147	0.0146262	8426	0.174374	0.0363702	8426	-6.52904	1.75967	8376	-0.0265015	0.00451447
8425	0.202172	0.0145652	8425	0.174413	0.0362799	8425	-6.5233	1.75633	8375	-0.0264784	0.00449601
8424	0.202197	0.0145046	8424	0.174453	0.0361907	8424	-6.51755	1.75304	8374	-0.0264551	0.00447755
8423	0.202221	0.0144445	8423	0.174492	0.0361025	8423	-6.51179	1.74981	8373	-0.0264315	0.0044591
8422	0.202246	0.0143848	8422	0.174532	0.0360153	8422	-6.50601	1.74663	8372	-0.0264077	0.00444066
8421	0.202271	0.0143255	8421	0.174572	0.0359291	8421	-6.50023	1.74349	8371	-0.0263836	0.00442221
8420	0.202295	0.0142666	8420	0.174612	0.035844	8420	-6.49444	1.74041	8370	-0.0263593	0.00440377
8419	0.20232	0.0142082	8419	0.174652	0.0357598	8419	-6.48863	1.73737	8369	-0.0263347	0.00438532
8418	0.202345	0.0141502	8418	0.174693	0.0356766	8418	-6.48281	1.73439	8368	-0.02631	0.00436686
8417	0.202369	0.0140926	8417	0.174733	0.0355944	8417	-6.47699	1.73144	8367	-0.0262849	0.00434841
8416	0.202394	0.0140355	8416	0.174774	0.0355132	8416	-6.47115	1.72855	8366	-0.0262596	0.00432994
8415	0.202419	0.0139788	8415	0.174815	0.0354329	8415	-6.46529	1.72569	8365	-0.0262341	0.00431147
8414	0.202444	0.0139224	8414	0.174856	0.0353535	8414	-6.45943	1.72288	8364	-0.0262084	0.004293
8413	0.202468	0.0138665	8413	0.174897	0.0352751	8413	-6.45355	1.72012	8363	-0.0261824	0.00427452
8412	0.202493	0.0138111	8412	0.174939	0.0351975	8412	-6.44767	1.7174	8362	-0.0261562	0.00425604
8411	0.202518	0.013756	8411	0.17498	0.0351209	8411	-6.44176	1.71471	8361	-0.0261298	0.00423756
8410	0.202543	0.0137013	8410	0.175022	0.0350452	8410	-6.43585	1.71207	8360	-0.0261032	0.00421907
8409	0.202567	0.013647	8409	0.175064	0.0349703	8409	-6.42993	1.70947	8359	-0.0260764	0.00420058
8408	0.202592	0.0135932	8408	0.175106	0.0348963	8408	-6.42399	1.70691	8358	-0.0260494	0.00418209
8407	0.202617	0.0135397	8407	0.175148	0.0348232	8407	-6.41803	1.70439	8357	-0.0260221	0.0041636
8406	0.202642	0.0134867	8406	0.175191	0.0347509	8406	-6.41207	1.7019	8356	-0.0259947	0.0041451
8405	0.202667	0.013434	8405	0.175234	0.0346794	8405	-6.40609	1.69945	8355	-0.0259671	0.00412661
8404	0.202692	0.0133817	8404	0.175277	0.0346088	8404	-6.4001	1.69704	8354	-0.0259392	0.00410812
8403	0.202717	0.0133298	8403	0.17532	0.0345389	8403	-6.3941	1.69466	8353	-0.0259112	0.00408962
8402	0.202742	0.0132783	8402	0.175363	0.0344699	8402	-6.38808	1.69232	8352	-0.025883	0.00407113
8401	0.202767	0.0132272	8401	0.175407	0.0344016	8401	-6.38205	1.69001	8351	-0.0258546	0.00405265
8400	0.202792	0.0131765	8400	0.175451	0.0343341	8400	-6.376	1.68773	8350	-0.0258261	0.00403417
8399	0.202817	0.0131261	8399	0.175495	0.0342673	8399	-6.36994	1.68548	8349	-0.0257974	0.00401569
8398	0.202842	0.0130761	8398	0.175539	0.0342013	8398	-6.36387	1.68327	8348	-0.0257685	0.00399722
8397	0.202868	0.0130265	8397	0.175584	0.034136	8397	-6.35778	1.68108	8347	-0.0257394	0.00397875
8396	0.202893	0.0129773	8396	0.175628	0.0340715	8396	-6.35168	1.67893	8346	-0.0257102	0.0039603
8395	0.202918	0.0129284	8395	0.175673	0.0340076	8395	-6.34557	1.6768	8345	-0.0256808	0.00394185
8394	0.202943	0.0128799	8394	0.175719	0.0339444	8394	-6.33943	1.67471	8344	-0.0256512	0.00392342
8393	0.202969	0.0128318	8393	0.175764	0.0338819	8393	-6.33329	1.67263	8343	-0.0256215	0.00390499
8392	0.202994	0.012784	8392	0.17581	0.0338201	8392	-6.32713	1.67059	8342	-0.0255917	0.00388659
8391	0.20302	0.0127366	8391	0.175856	0.0337589	8391	-6.32095	1.66857	8341	-0.0255617	0.00386819
8390	0.203045	0.0126895	8390	0.175902	0.0336983	8390	-6.31476	1.66658	8340	-0.0255316	0.00384981
8389	0.203071	0.0126428	8389	0.175949	0.0336384	8389	-6.30856	1.66461	8339	-0.0255014	0.00383145
8388	0.203097	0.0125964	8388	0.175996	0.0335791	8388	-6.30234	1.66266	8338	-0.025471	0.00381311
8387	0.203122	0.0125504	8387	0.176043	0.0335203	8387	-6.2961	1.66074	8337	-0.0254404	0.00379479
8386	0.203148	0.0125047	8386	0.17609	0.0334622	8386	-6.28985	1.65884	8336	-0.0254098	0.00377649
8385	0.203174	0.0124594	8385	0.176138	0.0334046	8385	-6.28358	1.65696	8335	-0.025379	0.00375822
8384	0.2032	0.0124143	8384	0.176186	0.0333476	8384	-6.2773	1.6551	8334	-0.0253482	0.00373997
8383	0.203226	0.0123696	8383	0.176235	0.0332911	8383	-6.271	1.65326	8333	-0.0253172	0.00372175
8382	0.203252	0.0123253	8382	0.176283	0.0332352	8382	-6.26468	1.65144	8332	-0.0252861	0.00370356
8381	0.203278	0.0122812	8381	0.176332	0.0331798	8381	-6.25835	1.64964	8331	-0.0252549	0.00368539
8380	0.203304	0.0122375	8380	0.176381	0.0331249	8380	-6.25201	1.64786	8330	-0.0252236	0.00366726
8379	0.203331	0.0121941	8379	0.176431	0.0330705	8379	-6.24564	1.64609	8329	-0.0251921	0.00364917
8378	0.203357	0.012151	8378	0.176481	0.0330165	8378	-6.23926	1.64434	8328	-0.0251606	0.00363111
8377	0.203384	0.0121083	8377	0.176531	0.032963	8377	-6.23286	1.6426	8327	-0.025129	0.00361309
8376	0.20341	0.0120658	8376	0.176581	0.03291	8376	-6.22645	1.64088	8326	-0.0250974	0.00359511
8375	0.203437	0.0120236	8375	0.176632	0.0328575	8375	-6.22002	1.63918	8325	-0.0250656	0.00357717
8374	0.203463	0.0119817	8374	0.176683	0.0328053	8374	-6.21357	1.63748	8324	-0.0250338	0.00355927
8373	0.20349	0.0119402	8373	0.176735	0.0327536	8373	-6.2071	1.6358	8323	-0.0250018	0.00354142
8372	0.203517	0.0118989	8372	0.176787	0.0327022	8372	-6.20062	1.63414	8322	-0.0249698	0.00352362
8371	0.203544	0.0118579	8371	0.176839	0.0326513	8371	-6.19412	1.63248	8321	-0.0249378	0.00350586
8370	0.203571	0.0118172	8370	0.176892	0.0326008	8370	-6.1876	1.63084	8320	-0.0249057	0.00348816
8369	0.203598	0.0117768	8369	0.176944	0.0325506	8369	-6.18106	1.6292	8319	-0.0248735	0.00347051
8368	0.203625	0.0117366	8368	0.176998	0.0325008	8368	-6.17451	1.62758	8318	-0.0248412	0.00345292
8367	0.203653	0.0116968	8367	0.177051	0.0324513	8367	-6.16793	1.62596	8317	-0.0248089	0.00343539
8366	0.20368	0.0116572	8366	0.177105	0.0324022	8366	-6.16134	1.62436	8316	-0.0247766	0.00341792
8365	0.203708	0.0116178	8365	0.17716	0.0323534	8365	-6.15472	1.62276	8315	-0.0247442	0.00340051
8364	0.203735	0.0115788	8364	0.177214	0.032305	8364	-6.14808	1.62117	8314	-0.0247118	0.00338316
8363	0.203763	0.01154	8363	0.177269	0.0322569	8363	-6.14142	1.61958	8313	-0.0246793	0.00336588
8362	0.203791	0.0115014	8362	0.177325	0.0322091	8362	-6.13473	1.61801	8312	-0.0246468	0.00334867
8361	0.203819	0.0114631	8361	0.17738	0.0321617	8361	-6.12802	1.61643	8311	-0.0246142	0.00333154
8360	0.203847	0.0114251	8360	0.177436	0.0321146	8360	-6.12128	1.61486	8310	-0.0245817	0.00331447
8359	0.203875	0.0113873	8359	0.177493	0.0320678	8359	-6.11451	1.6133	8309	-0.0245491	0.00329748
8358	0.203904	0.0113498	8358	0.17755	0.0320213	8358	-6.10772	1.61174	8308	-0.0245165	0.00328057
8357	0.203932	0.0113125	8357	0.177607	0.0319751	8357	-6.10089	1.61018	8307	-0.0244839	0.00326375
8356	0.203961	0.0112754	8356	0.177664	0.0319292	8356	-6.09404	1.60863	8306	-0.0244512	0.003247
8355	0.20399	0.0112385	8355	0.177722	0.0318836	8355	-6.08715	1.60708	8305	-0.0244186	0.00323033
8354	0.204019	0.0112019	8354	0.17778	0.0318383	8354	-6.08023	1.60552	8304	-0.0243859	0.00321375
8353	0.204048	0.0111655	8353	0.177839	0.0317932	8353	-6.07328	1.60397	8303	-0.0243533	0.00319726
8352	0.204077	0.0111293	8352	0.177898	0.0317485	8352	-6.0663	1.60242	8302	-0.0243206	0.00318085
8351	0.204106	0.0110934	8351	0.177957	0.031704	8351	-6.05928	1.60087	8301	-0.0242879	0.00316452
8350	0.204136	0.0110576	8350	0.178016	0.0316598	8350	-6.05222	1.59931	8300	-0.0242553	0.00314828
8349	0.204166	0.0110221	8349	0.178076	0.0316158	8349	-6.04513	1.59776	8299	-0.0242226	0.00313214
8348	0.204196	0.0109868	8348	0.178137	0.0315721	8348	-6.038	1.5962	8298	-0.02419	0.00311608
8347	0.204226	0.0109516	8347	0.178197	0.0315287	8347	-6.03083	1.59464	8297	-0.0241573	0.00310011
8346	0.204256	0.0109167	8346	0.178258	0.0314855	8346	-6.02362	1.59307	8296	-0.0241247	0.00308424
8345	0.204287	0.0108819	8345	0.17832	0.0314426	8345	-6.01637	1.5915	8295	-0.0240921	0.00306845
8344	0.204317	0.0108474	8344	0.178381	0.0313999	8344	-6.00907	1.58993	8294	-0.0240596	0.00305277
8343	0.204348	0.010813	8343	0.178443	0.0313574	8343	-6.00174	1.58834	8293	-0.024027	0.00303717
8342	0.204379	0.0107788	8342	0.178506	0.0313152	8342	-5.99436	1.58676	8292	-0.0239945	0.00302168
8341	0.204411	0.0107447	8341	0.178568	0.0312732	8341	-5.98693	1.58516	8291	-0.023962	0.00300628
8340	0.204442	0.0107109	8340	0.178631	0.0312314	8340	-5.97946	1.58356	8290	-0.0239295	0.00299099
8339	0.204474	0.0106772	8339	0.178695	0.0311898	8339	-5.97195	1.58195	8289	-0.0238971	0.00297579
8338	0.204506	0.0106437	8338	0.178759	0.0311485	8338	-5.96438	1.58033	8288	-0.0238647	0.0029607
8337	0.204538	0.0106103	8337	0.178823	0.0311073	8337	-5.95677	1.5787	8287	-0.0238323	0.00294571
8336	0.20457	0.0105771	8336	0.178887	0.0310664	8336	-5.94911	1.57706	8286	-0.0238	0.00293082
8335	0.204603	0.010544	8335	0.178952	0.0310257	8335	-5.9414	1.5754	8285	-0.0237677	0.00291605
8334	0.204635	0.0105111	8334	0.179017	0.0309851	8334	-5.93363	1.57374	8284	-0.0237355	0.00290138
8333	0.204668	0.0104783	8333	0.179083	0.0309448	8333	-5.92582	1.57207	8283	-0.0237033	0.00288682
8332	0.204702	0.0104456	8332	0.179148	0.0309046	8332	-5.91795	1.57038	8282	-0.0236712	0.00287237
8331	0.204735	0.0104131	8331	0.179215	0.0308646	8331	-5.91002	1.56867	8281	-0.0236392	0.00285803
8330	0.204769	0.0103807	8330	0.179281	0.0308248	8330	-5.90205	1.56696	8280	-0.0236072	0.0028438
8329	0.204803	0.0103485	8329	0.179348	0.0307852	8329	-5.89401	1.56522	8279	-0.0235752	0.0028297
8328	0.204837	0.0103163	8328	0.179415	0.0307457	8328	-5.88592	1.56348	8278	-0.0235434	0.00281571
8327	0.204871	0.0102843	8327	0.179483	0.0307064	8327	-5.87777	1.56171	8277	-0.0235115	0.00280183
8326	0.204906	0.0102524	8326	0.179551	0.0306672	8326	-5.86956	1.55993	8276	-0.0234798	0.00278808
8325	0.204941	0.0102205	8325	0.179619	0.0306282	8325	-5.86129	1.55813	8275	-0.0234482	0.00277445
8324	0.204976	0.0101888	8324	0.179687	0.0305894	8324	-5.85296	1.55632	8274	-0.0234166	0.00276094
8323	0.205012	0.0101572	8323	0.179756	0.0305507	8323	-5.84457	1.55448	8273	-0.0233851	0.00274756
8322	0.205048	0.0101256	8322	0.179826	0.0305121	8322	-5.83611	1.55263	8272	-0.0233536	0.0027343
8321	0.205084	0.0100942	8321	0.179895	0.0304737	8321	-5.82759	1.55075	8271	-0.0233223	0.00272117
8320	0.20512	0.0100628	8320	0.179965	0.0304354	8320	-5.81901	1.54885	8270	-0.0232911	0.00270818
8319	0.205157	0.0100315	8319	0.180035	0.0303972	8319	-5.81036	1.54694	8269	-0.0232599	0.00269531
8318	0.205194	0.0100003	8318	0.180106	0.0303591	8318	-5.80164	1.545	8268	-0.0232288	0.00268257
8317	0.205231	0.00996918	8317	0.180177	0.0303212	8317	-5.79285	1.54303	8267	-0.0231979	0.00266998
8316	0.205268	0.0099381	8316	0.180248	0.0302833	8316	-5.784	1.54105	8266	-0.023167	0.00265751
8315	0.205306	0.00990708	8315	0.18032	0.0302456	8315	-5.77508	1.53904	8265	-0.0231362	0.00264519
8314	0.205344	0.00987611	8314	0.180392	0.030208	8314	-5.76608	1.537	8264	-0.0231055	0.002633
8313	0.205383	0.0098452	8313	0.180464	0.0301704	8313	-5.75702	1.53494	8263	-0.023075	0.00262096
8312	0.205421	0.00981433	8312	0.180537	0.030133	8312	-5.74788	1.53286	8262	-0.0230445	0.00260906
8311	0.20546	0.00978351	8311	0.18061	0.0300957	8311	-5.73867	1.53075	8261	-0.0230142	0.0025973
8310	0.2055	0.00975272	8310	0.180683	0.0300584	8310	-5.72938	1.52861	8260	-0.022984	0.0025857
8309	0.205539	0.00972197	8309	0.180757	0.0300212	8309	-5.72002	1.52644	8259	-0.0229539	0.00257424
8308	0.205579	0.00969124	8308	0.180831	0.0299841	8308	-5.71058	1.52425	8258	-0.0229239	0.00256293
8307	0.20562	0.00966055	8307	0.180906	0.0299471	8307	-5.70107	1.52203	8257	-0.022894	0.00255177
8306	0.20566	0.00962988	8306	0.18098	0.0299101	8306	-5.69148	1.51977	8256	-0.0228643	0.00254076
8305	0.205701	0.00959923	8305	0.181055	0.0298733	8305	-5.68181	1.5175	8255	-0.0228347	0.00252991
8304	0.205743	0.00956862	8304	0.181131	0.0298365	8304	-5.67207	1.51519	8254	-0.0228052	0.00251922
8303	0.205784	0.00953803	8303	0.181206	0.0297997	8303	-5.66226	1.51286	8253	-0.0227759	0.00250868
8302	0.205826	0.00950747	8302	0.181282	0.0297631	8302	-5.65238	1.5105	8252	-0.0227467	0.00249831
8301	0.205869	0.00947694	8301	0.181359	0.0297266	8301	-5.64243	1.50812	8251	-0.0227176	0.00248809
8300	0.205911	0.00944645	8300	0.181435	0.0296901	8300	-5.63241	1.50571	8250	-0.0226887	0.00247804
8299	0.205954	0.00941598	8299	0.181512	0.0296537	8299	-5.62232	1.50328	8249	-0.02266	0.00246815
8298	0.205997	0.00938556	8298	0.181589	0.0296175	8298	-5.61217	1.50083	8248	-0.0226313	0.00245843
8297	0.206041	0.00935516	8297	0.181667	0.0295813	8297	-5.60195	1.49835	8247	-0.0226029	0.00244888
8296	0.206084	0.00932481	8296	0.181744	0.0295452	8296	-5.59167	1.49585	8246	-0.0225746	0.0024395
8295	0.206128	0.00929449	8295	0.181822	0.0295092	8295	-5.58133	1.49333	8245	-0.0225464	0.00243029
8294	0.206173	0.00926421	8294	0.181901	0.0294734	8294	-5.57093	1.49079	8244	-0.0225184	0.00242125
8293	0.206217	0.00923398	8293	0.181979	0.0294376	8293	-5.56048	1.48823	8243	-0.0224906	0.00241239
8292	0.206262	0.00920378	8292	0.182058	0.0294019	8292	-5.54996	1.48566	8242	-0.0224629	0.0024037
8291	0.206308	0.00917363	8291	0.182137	0.0293664	8291	-5.53939	1.48306	8241	-0.0224354	0.00239519
8290	0.206353	0.00914353	8290	0.182216	0.0293309	8290	-5.52876	1.48044	8240	-0.0224081	0.00238686
8289	0.206399	0.00911348	8289	0.182296	0.0292956	8289	-5.51808	1.47781	8239	-0.022381	0.0023787
8288	0.206445	0.00908348	8288	0.182376	0.0292604	8288	-5.50735	1.47517	8238	-0.022354	0.00237073
8287	0.206491	0.00905353	8287	0.182456	0.0292253	8287	-5.49656	1.4725	8237	-0.0223272	0.00236294
8286	0.206538	0.00902364	8286	0.182536	0.0291904	8286	-5.48573	1.46982	8236	-0.0223006	0.00235534
8285	0.206585	0.0089938	8285	0.182616	0.0291555	8285	-5.47485	1.46713	8235	-0.0222742	0.00234792
8284	0.206632	0.00896402	8284	0.182697	0.0291208	8284	-5.46392	1.46443	8234	-0.0222479	0.00234069
8283	0.206679	0.0089343	8283	0.182777	0.0290863	8283	-5.45295	1.46171	8233	-0.0222219	0.00233364
8282	0.206727	0.00890464	8282	0.182858	0.0290518	8282	-5.44193	1.45898	8232	-0.022196	0.00232679
8281	0.206775	0.00887505	8281	0.18294	0.0290175	8281	-5.43087	1.45624	8231	-0.0221703	0.00232011
8280	0.206823	0.00884553	8280	0.183021	0.0289833	8280	-5.41976	1.45349	8230	-0.0221448	0.00231363
8279	0.206871	0.00881608	8279	0.183102	0.0289492	8279	-5.40862	1.45073	8229	-0.0221195	0.00230734
8278	0.20692	0.0087867	8278	0.183184	0.0289153	8278	-5.39744	1.44796	8228	-0.0220944	0.00230123
8277	0.206969	0.00875739	8277	0.183266	0.0288815	8277	-5.38622	1.44518	8227	-0.0220695	0.00229532
8276	0.207018	0.00872816	8276	0.183348	0.0288478	8276	-5.37497	1.4424	8226	-0.0220448	0.00228959
8275	0.207067	0.00869901	8275	0.18343	0.0288143	8275	-5.36368	1.4396	8225	-0.0220203	0.00228406
8274	0.207117	0.00866994	8274	0.183513	0.0287809	8274	-5.35235	1.43681	8224	-0.021996	0.00227872
8273	0.207167	0.00864095	8273	0.183595	0.0287477	8273	-5.341	1.434	8223	-0.0219719	0.00227357
8272	0.207217	0.00861205	8272	0.183678	0.0287146	8272	-5.32961	1.4312	8222	-0.021948	0.0022686
8271	0.207267	0.00858324	8271	0.18376	0.0286816	8271	-5.31819	1.42839	8221	-0.0219243	0.00226384
8270	0.207317	0.00855452	8270	0.183843	0.0286488	8270	-5.30675	1.42557	8220	-0.0219007	0.00225926
8269	0.207368	0.0085259	8269	0.183926	0.0286161	8269	-5.29528	1.42276	8219	-0.0218774	0.00225487
8268	0.207419	0.00849737	8268	0.184009	0.0285836	8268	-5.28378	1.41994	8218	-0.0218543	0.00225068
8267	0.20747	0.00846894	8267	0.184093	0.0285511	8267	-5.27226	1.41712	8217	-0.0218314	0.00224668
8266	0.207521	0.00844061	8266	0.184176	0.0285189	8266	-5.26072	1.4143	8216	-0.0218087	0.00224288
8265	0.207573	0.00841238	8265	0.184259	0.0284867	8265	-5.24915	1.41149	8215	-0.0217862	0.00223926
8264	0.207625	0.00838427	8264	0.184343	0.0284547	8264	-5.23756	1.40867	8214	-0.0217639	0.00223584
8263	0.207677	0.00835626	8263	0.184426	0.0284229	8263	-5.22596	1.40585	8213	-0.0217419	0.00223261
8262	0.207729	0.00832836	8262	0.18451	0.0283911	8262	-5.21434	1.40304	8212	-0.02172	0.00222957
8261	0.207781	0.00830058	8261	0.184594	0.0283596	8261	-5.2027	1.40024	8211	-0.0216983	0.00222673
8260	0.207834	0.00827292	8260	0.184678	0.0283281	8260	-5.19104	1.39743	8210	-0.0216769	0.00222408
8259	0.207886	0.00824537	8259	0.184761	0.0282968	8259	-5.17938	1.39463	8209	-0.0216557	0.00222162
8258	0.207939	0.00821795	8258	0.184845	0.0282656	8258	-5.1677	1.39184	8208	-0.0216347	0.00221935
8257	0.207992	0.00819065	8257	0.184929	0.0282345	8257	-5.15601	1.38905	8207	-0.0216139	0.00221728
8256	0.208046	0.00816348	8256	0.185013	0.0282035	8256	-5.14431	1.38627	8206	-0.0215933	0.0022154
8255	0.208099	0.00813644	8255	0.185097	0.0281727	8255	-5.1326	1.3835	8205	-0.0215729	0.00221371
8254	0.208153	0.00810953	8254	0.185181	0.028142	8254	-5.12088	1.38073	8204	-0.0215528	0.0022122
8253	0.208206	0.00808276	8253	0.185265	0.0281114	8253	-5.10916	1.37798	8203	-0.0215329	0.00221089
8252	0.20826	0.00805612	8252	0.18535	0.028081	8252	-5.09743	1.37523	8202	-0.0215131	0.00220978
8251	0.208314	0.00802963	8251	0.185434	0.0280506	8251	-5.0857	1.37249	8201	-0.0214937	0.00220885
8250	0.208369	0.00800328	8250	0.185518	0.0280204	8250	-5.07397	1.36977	8200	-0.0214744	0.00220811
8249	0.208423	0.00797707	8249	0.185602	0.0279902	8249	-5.06224	1.36705	8199	-0.0214554	0.00220755
8248	0.208478	0.00795101	8248	0.185686	0.0279602	8248	-5.05051	1.36435	8198	-0.0214366	0.00220719
8247	0.208533	0.0079251	8247	0.18577	0.0279303	8247	-5.03879	1.36166	8197	-0.021418	0.00220702
8246	0.208587	0.00789935	8246	0.185854	0.0279005	8246	-5.02706	1.35899	8196	-0.0213996	0.00220703
8245	0.208642	0.00787375	8245	0.185939	0.0278708	8245	-5.01534	1.35632	8195	-0.0213815	0.00220723
8244	0.208698	0.0078483	8244	0.186023	0.0278412	8244	-5.00363	1.35367	8194	-0.0213636	0.00220761
8243	0.208753	0.00782302	8243	0.186107	0.0278116	8243	-4.99192	1.35104	8193	-0.0213459	0.00220818
8242	0.208808	0.0077979	8242	0.186191	0.0277822	8242	-4.98023	1.34842	8192	-0.0213285	0.00220893
8241	0.208864	0.00777295	8241	0.186275	0.0277528	8241	-4.96854	1.34582	8191	-0.0213113	0.00220987
8240	0.20892	0.00774816	8240	0.186359	0.0277235	8240	-4.95687	1.34323	8190	-0.0212943	0.00221099
8239	0.208976	0.00772355	8239	0.186442	0.0276943	8239	-4.94521	1.34066	8189	-0.0212776	0.00221229
8238	0.209032	0.0076991	8238	0.186526	0.0276652	8238	-4.93356	1.33811	8188	-0.0212611	0.00221377
8237	0.209088	0.00767483	8237	0.18661	0.0276362	8237	-4.92193	1.33558	8187	-0.0212449	0.00221543
8236	0.209144	0.00765074	8236	0.186694	0.0276072	8236	-4.91031	1.33306	8186	-0.0212288	0.00221727
8235	0.2092	0.00762683	8235	0.186777	0.0275783	8235	-4.89872	1.33057	8185	-0.0212131	0.00221929
8234	0.209257	0.0076031	8234	0.186861	0.0275494	8234	-4.88714	1.32809	8184	-0.0211975	0.00222149
8233	0.209313	0.00757955	8233	0.186944	0.0275206	8233	-4.87558	1.32564	8183	-0.0211822	0.00222386
8232	0.20937	0.00755618	8232	0.187027	0.0274919	8232	-4.86404	1.3232	8182	-0.0211672	0.00222641
8231	0.209427	0.007533	8231	0.187111	0.0274632	8231	-4.85253	1.32079	8181	-0.0211523	0.00222914
8230	0.209484	0.00751001	8230	0.187194	0.0274347	8230	-4.84103	1.31839	8180	-0.0211378	0.00223203
8229	0.209541	0.00748721	8229	0.187277	0.0274062	8229	-4.82956	1.31601	8179	-0.0211234	0.0022351
8228	0.209598	0.0074646	8228	0.18736	0.0273778	8228	-4.81811	1.31366	8178	-0.0211094	0.00223834
8227	0.209655	0.00744218	8227	0.187442	0.0273494	8227	-4.80669	1.31133	8177	-0.0210955	0.00224175
8226	0.209712	0.00741995	8226	0.187525	0.0273212	8226	-4.79529	1.30902	8176	-0.021082	0.00224533
8225	0.209769	0.00739792	8225	0.187607	0.027293	8225	-4.78392	1.30673	8175	-0.0210686	0.00224907
8224	0.209827	0.00737609	8224	0.18769	0.0272649	8224	-4.77257	1.30446	8174	-0.0210555	0.00225298
8223	0.209884	0.00735445	8223	0.187772	0.0272369	8223	-4.76125	1.30221	8173	-0.0210427	0.00225706
8222	0.209941	0.00733301	8222	0.187854	0.027209	8222	-4.74996	1.29999	8172	-0.0210301	0.00226129
8221	0.209999	0.00731178	8221	0.187936	0.0271812	8221	-4.73869	1.29779	8171	-0.0210177	0.00226568
8220	0.210056	0.00729074	8220	0.188017	0.0271535	8220	-4.72746	1.29561	8170	-0.0210056	0.00227023
8219	0.210114	0.00726991	8219	0.188099	0.0271258	8219	-4.71625	1.29345	8169	-0.0209938	0.00227494
8218	0.210172	0.00724929	8218	0.18818	0.0270983	8218	-4.70508	1.29132	8168	-0.0209821	0.0022798
8217	0.210229	0.00722887	8217	0.188261	0.0270708	8217	-4.69394	1.28921	8167	-0.0209708	0.00228481
8216	0.210287	0.00720866	8216	0.188342	0.0270435	8216	-4.68283	1.28712	8166	-0.0209596	0.00228997
8215	0.210344	0.00718866	8215	0.188423	0.0270162	8215	-4.67175	1.28506	8165	-0.0209487	0.00229528
8214	0.210402	0.00716886	8214	0.188503	0.026989	8214	-4.66071	1.28301	8164	-0.020938	0.00230073
8213	0.21046	0.00714928	8213	0.188584	0.026962	8213	-4.6497	1.281	8163	-0.0209276	0.00230633
8212	0.210517	0.00712991	8212	0.188664	0.026935	8212	-4.63873	1.279	8162	-0.0209174	0.00231207
8211	0.210575	0.00711075	8211	0.188744	0.0269081	8211	-4.62779	1.27703	8161	-0.0209075	0.00231795
8210	0.210633	0.00709181	8210	0.188823	0.0268813	8210	-4.61689	1.27509	8160	-0.0208977	0.00232396
8209	0.21069	0.00707308	8209	0.188903	0.0268547	8209	-4.60603	1.27316	8159	-0.0208883	0.00233012
8208	0.210748	0.00705457	8208	0.188982	0.0268281	8208	-4.59521	1.27127	8158	-0.020879	0.00233641
8207	0.210805	0.00703627	8207	0.189061	0.0268016	8207	-4.58442	1.26939	8157	-0.02087	0.00234283
8206	0.210863	0.00701819	8206	0.189139	0.0267752	8206	-4.57368	1.26754	8156	-0.0208612	0.00234937
8205	0.21092	0.00700033	8205	0.189218	0.0267489	8205	-4.56297	1.26571	8155	-0.0208527	0.00235605
8204	0.210978	0.00698269	8204	0.189296	0.0267226	8204	-4.55231	1.26391	8154	-0.0208444	0.00236286
8203	0.211035	0.00696527	8203	0.189374	0.0266965	8203	-4.54169	1.26213	8153	-0.0208363	0.00236979
8202	0.211093	0.00694806	8202	0.189451	0.0266705	8202	-4.53111	1.26038	8152	-0.0208284	0.00237684
8201	0.21115	0.00693108	8201	0.189528	0.0266445	8201	-4.52057	1.25864	8151	-0.0208208	0.00238401
8200	0.211207	0.00691432	8200	0.189605	0.0266187	8200	-4.51008	1.25694	8150	-0.0208134	0.0023913
8199	0.211264	0.00689778	8199	0.189682	0.0265929	8199	-4.49963	1.25525	8149	-0.0208063	0.0023987
8198	0.211321	0.00688145	8198	0.189758	0.0265672	8198	-4.48923	1.25359	8148	-0.0207993	0.00240623
8197	0.211378	0.00686536	8197	0.189834	0.0265416	8197	-4.47888	1.25196	8147	-0.0207926	0.00241386
8196	0.211435	0.00684948	8196	0.18991	0.0265161	8196	-4.46857	1.25035	8146	-0.0207862	0.0024216
8195	0.211492	0.00683382	8195	0.189985	0.0264906	8195	-4.45831	1.24876	8145	-0.0207799	0.00242946
8194	0.211549	0.00681839	8194	0.19006	0.0264652	8194	-4.4481	1.2472	8144	-0.0207739	0.00243742
8193	0.211606	0.00680318	8193	0.190135	0.0264399	8193	-4.43794	1.24565	8143	-0.0207681	0.00244549
8192	0.211662	0.00678819	8192	0.190209	0.0264147	8192	-4.42783	1.24414	8142	-0.0207625	0.00245366
8191	0.211718	0.00677343	8191	0.190283	0.0263895	8191	-4.41777	1.24264	8141	-0.0207571	0.00246194
8190	0.211775	0.00675888	8190	0.190357	0.0263644	8190	-4.40776	1.24117	8140	-0.020752	0.00247031
8189	0.211831	0.00674456	8189	0.19043	0.0263393	8189	-4.3978	1.23973	8139	-0.0207471	0.00247878
8188	0.211887	0.00673046	8188	0.190503	0.0263143	8188	-4.3879	1.2383	8138	-0.0207424	0.00248735
8187	0.211943	0.00671658	8187	0.190576	0.0262894	8187	-4.37805	1.2369	8137	-0.0207379	0.00249602
8186	0.211999	0.00670292	8186	0.190648	0.0262645	8186	-4.36825	1.23552	8136	-0.0207337	0.00250477
8185	0.212054	0.00668948	8185	0.19072	0.0262396	8185	-4.35851	1.23417	8135	-0.0207297	0.00251362
8184	0.21211	0.00667626	8184	0.190791	0.0262148	8184	-4.34883	1.23284	8134	-0.0207258	0.00252256
8183	0.212165	0.00666326	8183	0.190862	0.02619	8183	-4.3392	1.23153	8133	-0.0207222	0.00253158
8182	0.212221	0.00665048	8182	0.190933	0.0261653	8182	-4.32963	1.23024	8132	-0.0207188	0.00254068
8181	0.212276	0.00663792	8181	0.191003	0.0261406	8181	-4.32012	1.22897	8131	-0.0207156	0.00254986
8180	0.212331	0.00662557	8180	0.191073	0.0261159	8180	-4.31067	1.22773	8130	-0.0207126	0.00255912
8179	0.212385	0.00661345	8179	0.191142	0.0260913	8179	-4.30128	1.22651	8129	-0.0207098	0.00256846
8178	0.21244	0.00660154	8178	0.191211	0.0260667	8178	-4.29194	1.22531	8128	-0.0207072	0.00257786
8177	0.212494	0.00658984	8177	0.191279	0.026042	8177	-4.28267	1.22413	8127	-0.0207048	0.00258734
8176	0.212548	0.00657836	8176	0.191347	0.0260175	8176	-4.27347	1.22297	8126	-0.0207026	0.00259689
8175	0.212602	0.00656709	8175	0.191415	0.0259929	8175	-4.26432	1.22184	8125	-0.0207006	0.0026065
8174	0.212656	0.00655604	8174	0.191482	0.0259683	8174	-4.25525	1.22073	8124	-0.0206987	0.00261617
8173	0.21271	0.0065452	8173	0.191549	0.0259438	8173	-4.24625	1.21964	8123	-0.0206971	0.0026259
8172	0.212763	0.00653457	8172	0.191615	0.0259193	8172	-4.23732	1.21857	8122	-0.0206956	0.00263569
8171	0.212816	0.00652415	8171	0.19168	0.0258948	8171	-4.22846	1.21752	8121	-0.0206943	0.00264554
8170	0.212869	0.00651394	8170	0.191746	0.0258704	8170	-4.21968	1.2165	8120	-0.0206932	0.00265543
8169	0.212921	0.00650394	8169	0.19181	0.025846	8169	-4.21097	1.2155	8119	-0.0206922	0.00266538
8168	0.212974	0.00649415	8168	0.191874	0.0258216	8168	-4.20235	1.21452	8118	-0.0206915	0.00267538
8167	0.213026	0.00648456	8167	0.191938	0.0257973	8167	-4.19382	1.21357	8117	-0.0206909	0.00268542
8166	0.213077	0.00647518	8166	0.192001	0.025773	8166	-4.18536	1.21263	8116	-0.0206904	0.00269551
8165	0.213129	0.006466	8165	0.192063	0.0257487	8165	-4.177	1.21172	8115	-0.0206901	0.00270563
8164	0.21318	0.00645703	8164	0.192125	0.0257245	8164	-4.16872	1.21084	8114	-0.02069	0.0027158
8163	0.213231	0.00644826	8163	0.192187	0.0257003	8163	-4.16054	1.20997	8113	-0.0206901	0.002726
8162	0.213281	0.00643968	8162	0.192248	0.0256762	8162	-4.15245	1.20913	8112	-0.0206902	0.00273624
8161	0.213331	0.00643131	8161	0.192308	0.0256521	8161	-4.14445	1.20831	8111	-0.0206906	0.00274651
8160	0.213381	0.00642313	8160	0.192368	0.025628	8160	-4.13656	1.20751	8110	-0.0206911	0.00275681
8159	0.213431	0.00641515	8159	0.192427	0.025604	8159	-4.12876	1.20674	8109	-0.0206917	0.00276713
8158	0.21348	0.00640736	8158	0.192485	0.0255801	8158	-4.12107	1.20599	8108	-0.0206925	0.00277749
8157	0.213529	0.00639976	8157	0.192543	0.0255562	8157	-4.11349	1.20527	8107	-0.0206934	0.00278787
8156	0.213577	0.00639236	8156	0.1926	0.0255323	8156	-4.10601	1.20456	8106	-0.0206945	0.00279826
8155	0.213625	0.00638514	8155	0.192657	0.0255085	8155	-4.09863	1.20388	8105	-0.0206957	0.00280868
8154	0.213673	0.00637812	8154	0.192713	0.0254847	8154	-4.09138	1.20322	8104	-0.020697	0.00281912
8153	0.21372	0.00637127	8153	0.192768	0.025461	8153	-4.08423	1.20259	8103	-0.0206985	0.00282957
8152	0.213767	0.00636461	8152	0.192823	0.0254374	8152	-4.0772	1.20198	8102	-0.0207001	0.00284004
8151	0.213813	0.00635814	8151	0.192877	0.0254138	8151	-4.07029	1.20139	8101	-0.0207018	0.00285052
8150	0.213859	0.00635184	8150	0.19293	0.0253902	8150	-4.0635	1.20083	8100	-0.0207037	0.00286101
8149	0.213904	0.00634572	8149	0.192983	0.0253667	8149	-4.05683	1.20028	8099	-0.0207056	0.0028715
8148	0.213949	0.00633977	8148	0.193035	0.0253433	8148	-4.05029	1.19976	8098	-0.0207077	0.00288201
8147	0.213994	0.006334	8147	0.193086	0.0253199	8147	-4.04387	1.19927	8097	-0.0207099	0.00289252
8146	0.214038	0.0063284	8146	0.193137	0.0252966	8146	-4.03758	1.1988	8096	-0.0207122	0.00290303
8145	0.214082	0.00632297	8145	0.193187	0.0252733	8145	-4.03142	1.19835	8095	-0.0207146	0.00291354
8144	0.214125	0.00631771	8144	0.193236	0.0252501	8144	-4.0254	1.19792	8094	-0.0207171	0.00292405
8143	0.214168	0.00631261	8143	0.193284	0.0252269	8143	-4.01951	1.19751	8093	-0.0207198	0.00293457
8142	0.21421	0.00630767	8142	0.193332	0.0252037	8142	-4.01376	1.19713	8092	-0.0207225	0.00294507
8141	0.214251	0.0063029	8141	0.193379	0.0251807	8141	-4.00815	1.19677	8091	-0.0207253	0.00295558
8140	0.214292	0.00629828	8140	0.193425	0.0251576	8140	-4.00268	1.19644	8090	-0.0207283	0.00296608
8139	0.214333	0.00629382	8139	0.19347	0.0251347	8139	-3.99736	1.19613	8089	-0.0207313	0.00297657
8138	0.214373	0.00628952	8138	0.193515	0.0251117	8138	-3.99218	1.19584	8088	-0.0207344	0.00298705
8137	0.214412	0.00628536	8137	0.193559	0.0250889	8137	-3.98715	1.19557	8087	-0.0207376	0.00299752
8136	0.214451	0.00628136	8136	0.193602	0.0250661	8136	-3.98227	1.19532	8086	-0.0207409	0.00300798
8135	0.21449	0.0062775	8135	0.193644	0.0250433	8135	-3.97754	1.1951	8085	-0.0207443	0.00301843
8134	0.214527	0.00627379	8134	0.193685	0.0250206	8134	-3.97297	1.1949	8084	-0.0207477	0.00302886
8133	0.214564	0.00627023	8133	0.193726	0.024998	8133	-3.96854	1.19472	8083	-0.0207513	0.00303928
8132	0.214601	0.00626681	8132	0.193766	0.0249755	8132	-3.96427	1.19457	8082	-0.0207549	0.00304969
8131	0.214637	0.00626353	8131	0.193805	0.024953	8131	-3.96015	1.19444	8081	-0.0207585	0.00306008
8130	0.214672	0.00626039	8130	0.193843	0.0249307	8130	-3.95619	1.19433	8080	-0.0207623	0.00307045
8129	0.214707	0.00625739	8129	0.19388	0.0249084	8129	-3.95238	1.19425	8079	-0.0207661	0.0030808
8128	0.214741	0.00625454	8128	0.193916	0.0248862	8128	-3.94873	1.19419	8078	-0.02077	0.00309113
8127	0.214775	0.00625181	8127	0.193952	0.0248642	8127	-3.94523	1.19416	8077	-0.0207739	0.00310144
8126	0.214807	0.00624922	8126	0.193987	0.0248422	8126	-3.9419	1.19414	8076	-0.0207779	0.00311174
8125	0.21484	0.00624677	8125	0.194021	0.0248204	8125	-3.93872	1.19415	8075	-0.020782	0.00312201
8124	0.214871	0.00624445	8124	0.194054	0.0247986	8124	-3.9357	1.19419	8074	-0.0207861	0.00313226
8123	0.214902	0.00624225	8123	0.194086	0.0247771	8123	-3.93285	1.19425	8073	-0.0207903	0.00314248
8122	0.214932	0.00624019	8122	0.194118	0.0247556	8122	-3.93015	1.19433	8072	-0.0207945	0.00315269
8121	0.214962	0.00623825	8121	0.194148	0.0247343	8121	-3.92762	1.19444	8071	-0.0207988	0.00316287
8120	0.21499	0.00623643	8120	0.194178	0.0247131	8120	-3.92525	1.19457	8070	-0.0208031	0.00317303
8119	0.215018	0.00623474	8119	0.194207	0.024692	8119	-3.92305	1.19473	8069	-0.0208074	0.00318317
8118	0.215046	0.00623317	8118	0.194235	0.0246711	8118	-3.92101	1.19491	8068	-0.0208118	0.00319328
8117	0.215073	0.00623171	8117	0.194262	0.0246503	8117	-3.91913	1.19511	8067	-0.0208162	0.00320337
8116	0.215098	0.00623038	8116	0.194288	0.0246297	8116	-3.91743	1.19534	8066	-0.0208207	0.00321344
8115	0.215124	0.00622916	8115	0.194313	0.0246093	8115	-3.91589	1.1956	8065	-0.0208252	0.00322348
8114	0.215148	0.00622805	8114	0.194338	0.024589	8114	-3.91452	1.19588	8064	-0.0208297	0.0032335
8113	0.215172	0.00622705	8113	0.194361	0.0245689	8113	-3.91332	1.19618	8063	-0.0208342	0.0032435
8112	0.215195	0.00622616	8112	0.194384	0.024549	8112	-3.91229	1.19651	8062	-0.0208388	0.00325348
8111	0.215217	0.00622538	8111	0.194405	0.0245292	8111	-3.91143	1.19686	8061	-0.0208434	0.00326344
8110	0.215239	0.0062247	8110	0.194426	0.0245096	8110	-3.91074	1.19724	8060	-0.0208481	0.00327339
8109	0.215259	0.00622413	8109	0.194446	0.0244902	8109	-3.91023	1.19764	8059	-0.0208527	0.00328334
8108	0.215279	0.00622365	8108	0.194465	0.024471	8108	-3.90989	1.19807	8058	-0.0208575	0.00329327
8107	0.215298	0.00622328	8107	0.194483	0.0244519	8107	-3.90972	1.19852	8057	-0.0208623	0.00330321
8106	0.215316	0.006223	8106	0.1945	0.0244331	8106	-3.90973	1.19899	8056	-0.0208672	0.00331315
8105	0.215334	0.00622281	8105	0.194516	0.0244144	8105	-3.90992	1.19949	8055	-0.0208721	0.00332309
8104	0.21535	0.00622271	8104	0.194531	0.0243959	8104	-3.91028	1.20002	8054	-0.0208771	0.00333304
8103	0.215366	0.0062227	8103	0.194545	0.0243776	8103	-3.91083	1.20057	8053	-0.0208822	0.00334301
8102	0.215381	0.00622278	8102	0.194558	0.0243595	8102	-3.91155	1.20114	8052	-0.0208873	0.00335299
8101	0.215395	0.00622294	8101	0.19457	0.0243416	8101	-3.91245	1.20174	8051	-0.0208926	0.00336299
8100	0.215409	0.00622318	8100	0.194581	0.0243239	8100	-3.91353	1.20237	8050	-0.0208979	0.00337301
8099	0.215421	0.0062235	8099	0.194592	0.0243064	8099	-3.91479	1.20302	8049	-0.0209033	0.00338306
8098	0.215433	0.0062239	8098	0.194601	0.0242891	8098	-3.91624	1.20369	8048	-0.0209089	0.00339314
8097	0.215443	0.00622437	8097	0.194609	0.0242719	8097	-3.91787	1.20439	8047	-0.0209145	0.00340324
8096	0.215453	0.00622491	8096	0.194617	0.024255	8096	-3.91968	1.20511	8046	-0.0209203	0.00341339
8095	0.215462	0.00622552	8095	0.194623	0.0242382	8095	-3.92168	1.20586	8045	-0.0209262	0.00342357
8094	0.21547	0.0062262	8094	0.194628	0.0242217	8094	-3.92387	1.20663	8044	-0.0209322	0.00343379
8093	0.215477	0.00622694	8093	0.194633	0.0242054	8093	-3.92624	1.20742	8043	-0.0209383	0.00344406
8092	0.215483	0.00622774	8092	0.194636	0.0241892	8092	-3.9288	1.20824	8042	-0.0209446	0.00345438
8091	0.215488	0.0062286	8091	0.194638	0.0241732	8091	-3.93155	1.20908	8041	-0.020951	0.00346474
8090	0.215493	0.00622951	8090	0.19464	0.0241575	8090	-3.93448	1.20995	8040	-0.0209575	0.00347516
8089	0.215496	0.00623048	8089	0.19464	0.0241419	8089	-3.93761	1.21084	8039	-0.0209642	0.00348564
8088	0.215499	0.0062315	8088	0.194639	0.0241265	8088	-3.94093	1.21175	8038	-0.020971	0.00349618
8087	0.2155	0.00623256	8087	0.194638	0.0241113	8087	-3.94444	1.21269	8037	-0.020978	0.00350677
8086	0.215501	0.00623367	8086	0.194635	0.0240962	8086	-3.94814	1.21365	8036	-0.0209852	0.00351744
8085	0.2155	0.00623482	8085	0.194631	0.0240814	8085	-3.95204	1.21464	8035	-0.0209925	0.00352817
8084	0.215499	0.006236	8084	0.194626	0.0240667	8084	-3.95613	1.21565	8034	-0.0210001	0.00353897
8083	0.215496	0.00623723	8083	0.19462	0.0240522	8083	-3.96042	1.21668	8033	-0.0210078	0.00354984
8082	0.215493	0.00623849	8082	0.194613	0.0240379	8082	-3.9649	1.21773	8032	-0.0210156	0.00356079
8081	0.215488	0.00623977	8081	0.194605	0.0240237	8081	-3.96958	1.21881	8031	-0.0210237	0.00357182
8080	0.215483	0.00624109	8080	0.194596	0.0240097	8080	-3.97446	1.21991	8030	-0.021032	0.00358293
8079	0.215476	0.00624243	8079	0.194586	0.0239959	8079	-3.97954	1.22103	8029	-0.0210404	0.00359412
8078	0.215469	0.0062438	8078	0.194575	0.0239823	8078	-3.98482	1.22218	8028	-0.0210491	0.00360539
8077	0.21546	0.00624518	8077	0.194562	0.0239687	8077	-3.9903	1.22335	8027	-0.021058	0.00361676
8076	0.215451	0.00624658	8076	0.194549	0.0239554	8076	-3.99598	1.22454	8026	-0.0210671	0.00362821
8075	0.21544	0.006248	8075	0.194534	0.0239422	8075	-4.00186	1.22575	8025	-0.0210764	0.00363976
8074	0.215428	0.00624943	8074	0.194519	0.0239291	8074	-4.00795	1.22699	8024	-0.0210859	0.0036514
8073	0.215415	0.00625086	8073	0.194502	0.0239162	8073	-4.01424	1.22825	8023	-0.0210957	0.00366314
8072	0.215402	0.00625231	8072	0.194484	0.0239034	8072	-4.02073	1.22953	8022	-0.0211057	0.00367497
8071	0.215387	0.00625376	8071	0.194465	0.0238908	8071	-4.02743	1.23083	8021	-0.0211159	0.00368691
8070	0.215371	0.00625521	8070	0.194445	0.0238782	8070	-4.03434	1.23216	8020	-0.0211264	0.00369894
8069	0.215353	0.00625666	8069	0.194424	0.0238658	8069	-4.04146	1.2335	8019	-0.0211372	0.00371109
8068	0.215335	0.0062581	8068	0.194402	0.0238535	8068	-4.04878	1.23487	8018	-0.0211482	0.00372333
8067	0.215316	0.00625954	8067	0.194378	0.0238414	8067	-4.05631	1.23626	8017	-0.0211594	0.00373569
8066	0.215295	0.00626098	8066	0.194354	0.0238293	8066	-4.06406	1.23767	8016	-0.0211709	0.00374815
8065	0.215274	0.0062624	8065	0.194328	0.0238173	8065	-4.07201	1.2391	8015	-0.0211827	0.00376072
8064	0.215251	0.00626381	8064	0.194301	0.0238055	8064	-4.08018	1.24056	8014	-0.0211948	0.00377339
8063	0.215227	0.00626521	8063	0.194273	0.0237937	8063	-4.08856	1.24203	8013	-0.0212071	0.00378617
8062	0.215202	0.00626659	8062	0.194244	0.023782	8062	-4.09715	1.24353	8012	-0.0212196	0.00379906
8061	0.215176	0.00626797	8061	0.194214	0.0237705	8061	-4.10595	1.24505	8011	-0.0212325	0.00381206
8060	0.215148	0.00626933	8060	0.194182	0.023759	8060	-4.11497	1.2466	8010	-0.0212456	0.00382516
8059	0.21512	0.00627069	8059	0.19415	0.0237476	8059	-4.12419	1.24816	8009	-0.0212589	0.00383836
8058	0.21509	0.00627203	8058	0.194116	0.0237363	8058	-4.13362	1.24975	8008	-0.0212726	0.00385168
8057	0.215059	0.00627338	8057	0.194081	0.0237251	8057	-4.14327	1.25136	8007	-0.0212865	0.0038651
8056	0.215027	0.00627471	8056	0.194045	0.0237141	8056	-4.15311	1.25299	8006	-0.0213007	0.00387862
8055	0.214994	0.00627605	8055	0.194008	0.0237031	8055	-4.16317	1.25465	8005	-0.0213151	0.00389225
8054	0.21496	0.00627738	8054	0.193969	0.0236922	8054	-4.17343	1.25634	8004	-0.0213298	0.00390598
8053	0.214925	0.00627872	8053	0.193929	0.0236814	8053	-4.1839	1.25804	8003	-0.0213449	0.00391982
8052	0.214888	0.00628005	8052	0.193889	0.0236708	8052	-4.19458	1.25977	8002	-0.0213601	0.00393375
8051	0.214851	0.00628139	8051	0.193847	0.0236602	8051	-4.20546	1.26153	8001	-0.0213757	0.00394779
8050	0.214812	0.00628274	8050	0.193803	0.0236497	8050	-4.21654	1.26331	8000	-0.0213915	0.00396193
8049	0.214772	0.00628409	8049	0.193759	0.0236394	8049	-4.22782	1.26512	7999	-0.0214077	0.00397617
8048	0.214731	0.00628544	8048	0.193713	0.0236291	8048	-4.23931	1.26695	7998	-0.0214241	0.00399051
8047	0.214689	0.00628681	8047	0.193666	0.023619	8047	-4.251	1.26881	7997	-0.0214407	0.00400495
8046	0.214645	0.00628819	8046	0.193618	0.0236089	8046	-4.26289	1.27069	7996	-0.0214577	0.00401948
8045	0.214601	0.00628958	8045	0.193569	0.023599	8045	-4.27498	1.2726	7995	-0.021475	0.00403411
8044	0.214556	0.00629098	8044	0.193518	0.0235892	8044	-4.28727	1.27453	7994	-0.0214925	0.00404883
8043	0.214509	0.0062924	8043	0.193467	0.0235794	8043	-4.29976	1.2765	7993	-0.0215104	0.00406365
8042	0.214461	0.00629384	8042	0.193414	0.0235698	8042	-4.31245	1.27849	7992	-0.0215285	0.00407856
8041	0.214412	0.00629529	8041	0.19336	0.0235603	8041	-4.32533	1.2805	7991	-0.0215469	0.00409356
8040	0.214362	0.00629676	8040	0.193304	0.0235508	8040	-4.33841	1.28255	7990	-0.0215656	0.00410864
8039	0.214311	0.00629825	8039	0.193248	0.0235415	8039	-4.35169	1.28462	7989	-0.0215846	0.00412382
8038	0.214259	0.00629976	8038	0.19319	0.0235322	8038	-4.36516	1.28672	7988	-0.0216039	0.00413908
8037	0.214205	0.00630129	8037	0.19313	0.0235231	8037	-4.37883	1.28884	7987	-0.0216235	0.00415443
8036	0.214151	0.00630285	8036	0.19307	0.023514	8036	-4.39269	1.291	7986	-0.0216434	0.00416986
8035	0.214095	0.00630443	8035	0.193008	0.0235051	8035	-4.40675	1.29318	7985	-0.0216636	0.00418537
8034	0.214039	0.00630603	8034	0.192946	0.0234962	8034	-4.42099	1.29539	7984	-0.0216841	0.00420096
8033	0.213981	0.00630767	8033	0.192881	0.0234874	8033	-4.43543	1.29763	7983	-0.0217049	0.00421663
8032	0.213922	0.00630933	8032	0.192816	0.0234787	8032	-4.45006	1.29989	7982	-0.021726	0.00423238
8031	0.213862	0.00631102	8031	0.192749	0.0234701	8031	-4.46488	1.30219	7981	-0.0217474	0.0042482
8030	0.213801	0.00631273	8030	0.192681	0.0234616	8030	-4.47989	1.30452	7980	-0.0217691	0.00426409
8029	0.213739	0.00631448	8029	0.192612	0.0234531	8029	-4.49509	1.30687	7979	-0.0217911	0.00428006
8028	0.213675	0.00631626	8028	0.192542	0.0234447	8028	-4.51048	1.30925	7978	-0.0218135	0.00429609
8027	0.213611	0.00631808	8027	0.19247	0.0234364	8027	-4.52605	1.31167	7977	-0.0218361	0.0043122
8026	0.213545	0.00631992	8026	0.192397	0.0234282	8026	-4.54182	1.31411	7976	-0.021859	0.00432837
8025	0.213479	0.0063218	8025	0.192322	0.02342	8025	-4.55776	1.31658	7975	-0.0218823	0.0043446
8024	0.213411	0.00632371	8024	0.192247	0.0234119	8024	-4.5739	1.31908	7974	-0.0219059	0.00436089
8023	0.213342	0.00632566	8023	0.19217	0.0234039	8023	-4.59021	1.32161	7973	-0.0219298	0.00437724
8022	0.213272	0.00632765	8022	0.192092	0.0233959	8022	-4.60672	1.32417	7972	-0.021954	0.00439364
8021	0.213201	0.00632967	8021	0.192012	0.023388	8021	-4.6234	1.32676	7971	-0.0219786	0.00441008
8020	0.213129	0.00633172	8020	0.191931	0.0233801	8020	-4.64027	1.32938	7970	-0.0220036	0.00442657
8019	0.213056	0.00633382	8019	0.191849	0.0233723	8019	-4.65732	1.33203	7969	-0.0220288	0.0044431
8018	0.212982	0.00633595	8018	0.191765	0.0233645	8018	-4.67455	1.33471	7968	-0.0220545	0.00445967
8017	0.212906	0.00633812	8017	0.191681	0.0233568	8017	-4.69196	1.33743	7967	-0.0220805	0.00447627
8016	0.21283	0.00634033	8016	0.191595	0.0233492	8016	-4.70955	1.34017	7966	-0.0221068	0.00449289
8015	0.212752	0.00634257	8015	0.191507	0.0233416	8015	-4.72731	1.34294	7965	-0.0221336	0.00450955
8014	0.212673	0.00634485	8014	0.191418	0.023334	8014	-4.74525	1.34575	7964	-0.0221607	0.00452622
8013	0.212594	0.00634717	8013	0.191328	0.0233265	8013	-4.76335	1.34858	7963	-0.0221882	0.0045429
8012	0.212513	0.00634952	8012	0.191237	0.0233191	8012	-4.78162	1.35145	7962	-0.022216	0.0045596
8011	0.212431	0.00635191	8011	0.191144	0.0233118	8011	-4.80005	1.35435	7961	-0.0222443	0.00457631
8010	0.212348	0.00635433	8010	0.19105	0.0233045	8010	-4.81864	1.35729	7960	-0.022273	0.00459302
8009	0.212264	0.00635679	8009	0.190954	0.0232973	8009	-4.8374	1.36025	7959	-0.0223021	0.00460973
8008	0.212179	0.00635928	8008	0.190858	0.0232901	8008	-4.85631	1.36325	7958	-0.0223316	0.00462644
8007	0.212092	0.00636179	8007	0.190759	0.0232831	8007	-4.87538	1.36628	7957	-0.0223615	0.00464314
8006	0.212005	0.00636435	8006	0.19066	0.0232761	8006	-4.8946	1.36934	7956	-0.0223918	0.00465983
8005	0.211916	0.00636693	8005	0.190559	0.0232692	8005	-4.91396	1.37244	7955	-0.0224226	0.0046765
8004	0.211827	0.00636954	8004	0.190457	0.0232624	8004	-4.93348	1.37557	7954	-0.0224537	0.00469315
8003	0.211736	0.00637217	8003	0.190353	0.0232557	8003	-4.95314	1.37873	7953	-0.0224854	0.00470978
8002	0.211644	0.00637484	8002	0.190248	0.0232491	8002	-4.97295	1.38192	7952	-0.0225174	0.00472637
8001	0.211551	0.00637753	8001	0.190142	0.0232425	8001	-4.99289	1.38515	7951	-0.02255	0.00474294
8000	0.211457	0.00638024	8000	0.190035	0.023236	8000	-5.01297	1.38841	7950	-0.0225829	0.00475947
7999	0.211362	0.00638298	7999	0.189925	0.0232297	7999	-5.03319	1.3917	7949	-0.0226164	0.00477595
7998	0.211265	0.00638574	7998	0.189815	0.0232234	7998	-5.05354	1.39502	7948	-0.0226503	0.00479239
7997	0.211168	0.00638852	7997	0.189703	0.0232172	7997	-5.07402	1.39838	7947	-0.0226846	0.00480879
7996	0.211069	0.00639132	7996	0.18959	0.0232111	7996	-5.09463	1.40177	7946	-0.0227195	0.00482513
7995	0.21097	0.00639414	7995	0.189476	0.0232051	7995	-5.11536	1.40519	7945	-0.0227548	0.00484141
7994	0.210869	0.00639698	7994	0.18936	0.0231992	7994	-5.13622	1.40864	7944	-0.0227907	0.00485763
7993	0.210767	0.00639982	7993	0.189242	0.0231934	7993	-5.1572	1.41213	7943	-0.022827	0.00487379
7992	0.210664	0.00640269	7992	0.189124	0.0231876	7992	-5.1783	1.41565	7942	-0.0228638	0.00488988
7991	0.21056	0.00640556	7991	0.189004	0.023182	7991	-5.19951	1.41919	7941	-0.0229011	0.0049059
7990	0.210455	0.00640844	7990	0.188882	0.0231764	7990	-5.22084	1.42277	7940	-0.0229389	0.00492184
7989	0.210349	0.00641133	7989	0.188759	0.023171	7989	-5.24228	1.42638	7939	-0.0229773	0.0049377
7988	0.210241	0.00641423	7988	0.188635	0.0231656	7988	-5.26382	1.43002	7938	-0.0230161	0.00495347
7987	0.210132	0.00641713	7987	0.188509	0.0231603	7987	-5.28548	1.43369	7937	-0.0230555	0.00496916
7986	0.210023	0.00642004	7986	0.188382	0.0231551	7986	-5.30724	1.43739	7936	-0.0230955	0.00498476
7985	0.209912	0.00642294	7985	0.188253	0.02315	7985	-5.32909	1.44112	7935	-0.0231359	0.00500027
7984	0.2098	0.00642585	7984	0.188124	0.023145	7984	-5.35105	1.44488	7934	-0.0231769	0.00501568
7983	0.209687	0.00642875	7983	0.187992	0.02314	7983	-5.37311	1.44867	7933	-0.0232184	0.00503099
7982	0.209573	0.00643164	7982	0.187859	0.0231351	7982	-5.39526	1.45249	7932	-0.0232604	0.00504621
7981	0.209457	0.00643453	7981	0.187725	0.0231304	7981	-5.4175	1.45633	7931	-0.0233029	0.00506133
7980	0.209341	0.00643741	7980	0.18759	0.0231256	7980	-5.43983	1.4602	7930	-0.0233459	0.00507634
7979	0.209223	0.00644028	7979	0.187452	0.023121	7979	-5.46225	1.4641	7929	-0.0233894	0.00509126
7978	0.209104	0.00644314	7978	0.187314	0.0231164	7978	-5.48475	1.46802	7928	-0.0234334	0.00510606
7977	0.208984	0.00644598	7977	0.187174	0.023112	7977	-5.50733	1.47197	7927	-0.0234779	0.00512076
7976	0.208863	0.0064488	7976	0.187033	0.0231075	7976	-5.53	1.47595	7926	-0.0235228	0.00513535
7975	0.208741	0.00645161	7975	0.18689	0.0231032	7975	-5.55274	1.47995	7925	-0.0235682	0.00514983
7974	0.208618	0.0064544	7974	0.186746	0.0230989	7974	-5.57555	1.48397	7924	-0.0236141	0.00516419
7973	0.208493	0.00645717	7973	0.1866	0.0230947	7973	-5.59843	1.48802	7923	-0.0236605	0.00517844
7972	0.208368	0.00645992	7972	0.186453	0.0230906	7972	-5.62138	1.49209	7922	-0.0237073	0.00519257
7971	0.208241	0.00646265	7971	0.186304	0.0230866	7971	-5.64439	1.49617	7921	-0.0237546	0.00520658
7970	0.208113	0.00646536	7970	0.186154	0.0230826	7970	-5.66747	1.50028	7920	-0.0238023	0.00522047
7969	0.207984	0.00646804	7969	0.186002	0.0230788	7969	-5.69059	1.5044	7919	-0.0238504	0.00523424
7968	0.207854	0.0064707	7968	0.185849	0.023075	7968	-5.71377	1.50855	7918	-0.023899	0.00524787
7967	0.207722	0.00647333	7967	0.185694	0.0230714	7967	-5.737	1.5127	7917	-0.023948	0.00526138
7966	0.20759	0.00647594	7966	0.185538	0.0230678	7966	-5.76027	1.51688	7916	-0.0239975	0.00527475
7965	0.207456	0.00647851	7965	0.18538	0.0230644	7965	-5.78359	1.52106	7915	-0.0240473	0.00528799
7964	0.207321	0.00648106	7964	0.185221	0.023061	7964	-5.80694	1.52526	7914	-0.0240976	0.0053011
7963	0.207185	0.00648358	7963	0.18506	0.0230578	7963	-5.83033	1.52947	7913	-0.0241483	0.00531406
7962	0.207048	0.00648607	7962	0.184897	0.0230546	7962	-5.85376	1.53369	7912	-0.0241994	0.00532689
7961	0.206909	0.00648852	7961	0.184733	0.0230516	7961	-5.87721	1.53791	7911	-0.0242508	0.00533957
7960	0.20677	0.00649094	7960	0.184568	0.0230486	7960	-5.90068	1.54215	7910	-0.0243027	0.0053521
7959	0.206629	0.00649332	7959	0.1844	0.0230458	7959	-5.92418	1.54638	7909	-0.024355	0.00536448
7958	0.206487	0.00649567	7958	0.184232	0.0230431	7958	-5.94769	1.55063	7908	-0.0244076	0.00537671
7957	0.206344	0.00649798	7957	0.184061	0.0230405	7957	-5.97122	1.55487	7907	-0.0244606	0.00538879
7956	0.2062	0.00650024	7956	0.183889	0.023038	7956	-5.99476	1.55912	7906	-0.024514	0.00540071
7955	0.206054	0.00650247	7955	0.183715	0.0230356	7955	-6.01831	1.56336	7905	-0.0245678	0.00541247
7954	0.205907	0.00650465	7954	0.18354	0.0230334	7954	-6.04186	1.56761	7904	-0.0246219	0.00542406
7953	0.205759	0.00650678	7953	0.183363	0.0230312	7953	-6.06542	1.57185	7903	-0.0246763	0.00543549
7952	0.20561	0.00650887	7952	0.183184	0.0230292	7952	-6.08897	1.57609	7902	-0.0247312	0.00544676
7951	0.20546	0.00651091	7951	0.183004	0.0230272	7951	-6.11251	1.58032	7901	-0.0247863	0.00545785
7950	0.205308	0.0065129	7950	0.182822	0.0230254	7950	-6.13605	1.58454	7900	-0.0248418	0.00546877
7949	0.205156	0.00651484	7949	0.182638	0.0230237	7949	-6.15957	1.58876	7899	-0.0248976	0.00547952
7948	0.205002	0.00651672	7948	0.182453	0.0230221	7948	-6.18308	1.59296	7898	-0.0249538	0.00549008
7947	0.204847	0.00651855	7947	0.182266	0.0230206	7947	-6.20657	1.59716	7897	-0.0250103	0.00550046
7946	0.20469	0.00652032	7946	0.182077	0.0230192	7946	-6.23003	1.60133	7896	-0.0250671	0.00551066
7945	0.204533	0.00652203	7945	0.181887	0.0230179	7945	-6.25347	1.6055	7895	-0.0251242	0.00552068
7944	0.204374	0.00652368	7944	0.181695	0.0230168	7944	-6.27688	1.60964	7894	-0.0251816	0.0055305
7943	0.204214	0.00652527	7943	0.181501	0.0230157	7943	-6.30025	1.61377	7893	-0.0252393	0.00554014
7942	0.204052	0.0065268	7942	0.181305	0.0230147	7942	-6.32359	1.61788	7892	-0.0252973	0.00554958
7941	0.20389	0.00652826	7941	0.181107	0.0230138	7941	-6.34689	1.62197	7891	-0.0253556	0.00555882
7940	0.203726	0.00652965	7940	0.180908	0.0230131	7940	-6.37014	1.62603	7890	-0.0254143	0.00556787
7939	0.203561	0.00653097	7939	0.180707	0.0230124	7939	-6.39335	1.63007	7889	-0.0254733	0.00557672
7938	0.203395	0.00653222	7938	0.180504	0.0230118	7938	-6.41651	1.63408	7888	-0.0255326	0.00558538
7937	0.203227	0.0065334	7937	0.1803	0.0230113	7937	-6.43961	1.63806	7887	-0.0255922	0.00559383
7936	0.203059	0.00653451	7936	0.180093	0.0230109	7936	-6.46266	1.64201	7886	-0.0256522	0.00560209
7935	0.202889	0.00653554	7935	0.179885	0.0230106	7935	-6.48564	1.64594	7885	-0.0257125	0.00561014
7934	0.202718	0.0065365	7934	0.179675	0.0230104	7934	-6.50856	1.64982	7884	-0.0257732	0.00561799
7933	0.202545	0.0065374	7933	0.179463	0.0230103	7933	-6.53141	1.65367	7883	-0.0258343	0.00562563
7932	0.202372	0.00653823	7932	0.17925	0.0230103	7932	-6.55419	1.65748	7882	-0.0258957	0.00563307
7931	0.202197	0.00653899	7931	0.179035	0.0230104	7931	-6.5769	1.66125	7881	-0.0259575	0.00564029
7930	0.202021	0.0065397	7930	0.178818	0.0230106	7930	-6.59952	1.66497	7880	-0.0260197	0.00564731
7929	0.201843	0.00654034	7929	0.178599	0.0230109	7929	-6.62207	1.66864	7879	-0.0260823	0.00565412
7928	0.201665	0.00654093	7928	0.178378	0.0230114	7928	-6.64452	1.67227	7878	-0.0261453	0.00566071
7927	0.201485	0.00654146	7927	0.178156	0.023012	7927	-6.66689	1.67584	7877	-0.0262087	0.00566709
7926	0.201304	0.00654193	7926	0.177932	0.0230127	7926	-6.68916	1.67936	7876	-0.0262725	0.00567326
7925	0.201122	0.00654236	7925	0.177706	0.0230135	7925	-6.71134	1.68282	7875	-0.0263367	0.0056792
7924	0.200938	0.00654273	7924	0.177479	0.0230145	7924	-6.73341	1.68622	7874	-0.0264013	0.00568493
7923	0.200753	0.00654306	7923	0.17725	0.0230156	7923	-6.75538	1.68956	7873	-0.0264664	0.00569044
7922	0.200568	0.00654334	7922	0.177019	0.0230168	7922	-6.77724	1.69284	7872	-0.0265319	0.00569572
7921	0.20038	0.00654358	7921	0.176786	0.0230182	7921	-6.79899	1.69605	7871	-0.0265978	0.00570079
7920	0.200192	0.00654378	7920	0.176552	0.0230197	7920	-6.82062	1.69919	7870	-0.0266642	0.00570562
7919	0.200003	0.00654394	7919	0.176316	0.0230214	7919	-6.84214	1.70225	7869	-0.026731	0.00571023
7918	0.199812	0.00654406	7918	0.176079	0.0230232	7918	-6.86353	1.70524	7868	-0.0267983	0.00571462
7917	0.19962	0.00654414	7917	0.175839	0.0230252	7917	-6.88479	1.70816	7867	-0.0268661	0.00571877
7916	0.199427	0.00654419	7916	0.175599	0.0230273	7916	-6.90592	1.71099	7866	-0.0269343	0.00572269
7915	0.199232	0.00654421	7915	0.175356	0.0230296	7915	-6.92692	1.71374	7865	-0.027003	0.00572638
7914	0.199037	0.0065442	7914	0.175112	0.023032	7914	-6.94779	1.71641	7864	-0.0270722	0.00572984
7913	0.19884	0.00654416	7913	0.174866	0.0230345	7913	-6.96851	1.71898	7863	-0.0271419	0.00573306
7912	0.198642	0.00654409	7912	0.174619	0.0230372	7912	-6.98909	1.72147	7862	-0.0272121	0.00573604
7911	0.198443	0.006544	7911	0.17437	0.0230401	7911	-7.00951	1.72387	7861	-0.0272828	0.00573879
7910	0.198243	0.00654388	7910	0.174119	0.0230431	7910	-7.02979	1.72617	7860	-0.027354	0.0057413
7909	0.198041	0.00654375	7909	0.173867	0.0230462	7909	-7.04991	1.72837	7859	-0.0274258	0.00574357
7908	0.197838	0.00654359	7908	0.173613	0.0230495	7908	-7.06987	1.73048	7858	-0.027498	0.0057456
7907	0.197635	0.00654342	7907	0.173358	0.023053	7907	-7.08967	1.73248	7857	-0.0275708	0.00574739
7906	0.197429	0.00654323	7906	0.173101	0.0230566	7906	-7.1093	1.73438	7856	-0.027644	0.00574897
7905	0.197223	0.00654303	7905	0.172842	0.0230603	7905	-7.12876	1.73616	7855	-0.0277178	0.00575033
7904	0.197016	0.00654281	7904	0.172582	0.0230642	7904	-7.14805	1.73784	7854	-0.027792	0.00575149
7903	0.196807	0.00654258	7903	0.172321	0.0230682	7903	-7.16715	1.73941	7853	-0.0278667	0.00575245
7902	0.196597	0.00654235	7902	0.172058	0.0230723	7902	-7.18608	1.74086	7852	-0.0279418	0.00575322
7901	0.196386	0.00654211	7901	0.171793	0.0230766	7901	-7.20482	1.7422	7851	-0.0280174	0.00575381
7900	0.196174	0.00654186	7900	0.171527	0.023081	7900	-7.22338	1.74341	7850	-0.0280934	0.00575424
7899	0.195961	0.00654161	7899	0.171259	0.0230856	7899	-7.24174	1.74451	7849	-0.0281697	0.00575451
7898	0.195747	0.00654136	7898	0.17099	0.0230903	7898	-7.25991	1.74548	7848	-0.0282465	0.00575462
7897	0.195531	0.0065411	7897	0.170719	0.0230951	7897	-7.27787	1.74632	7847	-0.0283237	0.0057546
7896	0.195314	0.00654085	7896	0.170447	0.0231	7896	-7.29563	1.74703	7846	-0.0284012	0.00575444
7895	0.195096	0.0065406	7895	0.170173	0.023105	7895	-7.31319	1.74762	7845	-0.0284791	0.00575416
7894	0.194877	0.00654036	7894	0.169898	0.0231102	7894	-7.33054	1.74806	7844	-0.0285574	0.00575377
7893	0.194657	0.00654013	7893	0.169621	0.0231154	7893	-7.34767	1.74838	7843	-0.0286359	0.00575327
7892	0.194435	0.00653991	7892	0.169343	0.0231208	7892	-7.36459	1.74856	7842	-0.0287148	0.00575267
7891	0.194213	0.00653971	7891	0.169063	0.0231263	7891	-7.3813	1.74861	7841	-0.028794	0.00575199
7890	0.193989	0.00653954	7890	0.168782	0.0231319	7890	-7.39781	1.74853	7840	-0.0288735	0.00575123
7889	0.193764	0.0065394	7889	0.1685	0.0231376	7889	-7.41411	1.74831	7839	-0.0289532	0.0057504
7888	0.193539	0.0065393	7888	0.168216	0.0231434	7888	-7.43022	1.74798	7838	-0.0290333	0.00574951
7887	0.193312	0.00653925	7887	0.167931	0.0231494	7887	-7.44613	1.74752	7837	-0.0291135	0.00574857
7886	0.193084	0.00653925	7886	0.167644	0.0231554	7886	-7.46184	1.74693	7836	-0.0291941	0.00574758
7885	0.192855	0.00653931	7885	0.167356	0.0231616	7885	-7.47736	1.74623	7835	-0.0292748	0.00574657
7884	0.192625	0.00653944	7884	0.167066	0.0231678	7884	-7.49269	1.74541	7834	-0.0293558	0.00574552
7883	0.192394	0.00653964	7883	0.166775	0.0231742	7883	-7.50784	1.74447	7833	-0.0294369	0.00574446
7882	0.192162	0.00653992	7882	0.166483	0.0231807	7882	-7.5228	1.74342	7832	-0.0295183	0.0057434
7881	0.191929	0.00654028	7881	0.166189	0.0231873	7881	-7.53759	1.74225	7831	-0.0295998	0.00574233
7880	0.191695	0.00654074	7880	0.165894	0.023194	7880	-7.55219	1.74097	7830	-0.0296815	0.00574127
7879	0.19146	0.0065413	7879	0.165598	0.0232008	7879	-7.56662	1.73959	7829	-0.0297633	0.00574023
7878	0.191225	0.00654196	7878	0.1653	0.0232077	7878	-7.58088	1.73809	7828	-0.0298453	0.00573922
7877	0.190988	0.00654274	7877	0.165001	0.0232147	7877	-7.59497	1.7365	7827	-0.0299273	0.00573823
7876	0.190751	0.00654362	7876	0.164701	0.0232217	7876	-7.6089	1.73479	7826	-0.0300095	0.00573729
7875	0.190512	0.00654464	7875	0.164399	0.0232289	7875	-7.62266	1.73299	7825	-0.0300918	0.00573639
7874	0.190273	0.00654578	7874	0.164097	0.0232362	7874	-7.63626	1.73109	7824	-0.0301742	0.00573553
7873	0.190033	0.00654706	7873	0.163792	0.0232436	7873	-7.6497	1.72909	7823	-0.0302567	0.00573472
7872	0.189792	0.00654848	7872	0.163487	0.023251	7872	-7.66299	1.727	7822	-0.0303392	0.00573397
7871	0.18955	0.00655005	7871	0.16318	0.0232586	7871	-7.67613	1.72481	7821	-0.0304218	0.00573327
7870	0.189308	0.00655177	7870	0.162872	0.0232662	7870	-7.68912	1.72253	7820	-0.0305045	0.00573264
7869	0.189065	0.00655366	7869	0.162563	0.0232739	7869	-7.70196	1.72016	7819	-0.0305871	0.00573206
7868	0.188821	0.0065557	7868	0.162253	0.0232817	7868	-7.71466	1.71771	7818	-0.0306698	0.00573156
7867	0.188576	0.00655792	7867	0.161941	0.0232895	7867	-7.72722	1.71516	7817	-0.0307525	0.00573113
7866	0.18833	0.00656031	7866	0.161628	0.0232974	7866	-7.73964	1.71254	7816	-0.0308353	0.00573077
7865	0.188084	0.00656289	7865	0.161314	0.0233054	7865	-7.75192	1.70983	7815	-0.0309179	0.00573049
7864	0.187837	0.00656565	7864	0.160999	0.0233134	7864	-7.76407	1.70704	7814	-0.0310006	0.00573028
7863	0.18759	0.0065686	7863	0.160682	0.0233215	7863	-7.7761	1.70417	7813	-0.0310833	0.00573016
7862	0.187342	0.00657175	7862	0.160364	0.0233296	7862	-7.78799	1.70123	7812	-0.0311658	0.00573013
7861	0.187093	0.00657511	7861	0.160046	0.0233378	7861	-7.79977	1.69821	7811	-0.0312484	0.00573018
7860	0.186843	0.00657867	7860	0.159726	0.023346	7860	-7.81142	1.69511	7810	-0.0313309	0.00573032
7859	0.186593	0.00658244	7859	0.159404	0.0233542	7859	-7.82295	1.69195	7809	-0.0314132	0.00573056
7858	0.186342	0.00658643	7858	0.159082	0.0233625	7858	-7.83437	1.68872	7808	-0.0314955	0.00573089
7857	0.186091	0.00659064	7857	0.158759	0.0233708	7857	-7.84568	1.68541	7807	-0.0315778	0.00573131
7856	0.185839	0.00659507	7856	0.158434	0.0233792	7856	-7.85687	1.68205	7806	-0.0316598	0.00573183
7855	0.185587	0.00659973	7855	0.158109	0.0233876	7855	-7.86794	1.67861	7805	-0.0317418	0.00573245
7854	0.185334	0.00660462	7854	0.157782	0.023396	7854	-7.8789	1.67512	7804	-0.0318236	0.00573317
7853	0.185081	0.00660974	7853	0.157455	0.0234045	7853	-7.88974	1.67156	7803	-0.0319053	0.005734
7852	0.184827	0.00661509	7852	0.157126	0.023413	7852	-7.90047	1.66795	7802	-0.0319869	0.00573492
7851	0.184573	0.00662068	7851	0.156797	0.0234216	7851	-7.91109	1.66427	7801	-0.0320682	0.00573595
7850	0.184318	0.00662651	7850	0.156467	0.0234303	7850	-7.92159	1.66054	7800	-0.0321494	0.00573709
7849	0.184063	0.00663257	7849	0.156135	0.023439	7849	-7.93198	1.65676	7799	-0.0322304	0.00573833
7848	0.183807	0.00663889	7848	0.155804	0.0234478	7848	-7.94225	1.65292	7798	-0.0323112	0.00573967
7847	0.183551	0.00664544	7847	0.155471	0.0234566	7847	-7.95241	1.64903	7797	-0.0323918	0.00574113
7846	0.183295	0.00665224	7846	0.155137	0.0234655	7846	-7.96245	1.64509	7796	-0.0324721	0.00574269
7845	0.183038	0.00665929	7845	0.154803	0.0234745	7845	-7.97238	1.6411	7795	-0.0325522	0.00574436
7844	0.182781	0.00666659	7844	0.154468	0.0234836	7844	-7.98219	1.63707	7794	-0.0326321	0.00574613
7843	0.182523	0.00667414	7843	0.154133	0.0234927	7843	-7.99189	1.63299	7793	-0.0327117	0.00574801
7842	0.182266	0.00668195	7842	0.153796	0.0235019	7842	-8.00148	1.62887	7792	-0.0327911	0.00575
7841	0.182008	0.00669	7841	0.15346	0.0235112	7841	-8.01095	1.62471	7791	-0.0328702	0.00575209
7840	0.18175	0.00669831	7840	0.153122	0.0235205	7840	-8.02031	1.6205	7790	-0.0329489	0.00575429
7839	0.181491	0.00670687	7839	0.152784	0.02353	7839	-8.02956	1.61626	7789	-0.0330274	0.0057566
7838	0.181233	0.00671569	7838	0.152446	0.0235395	7838	-8.03869	1.61198	7788	-0.0331056	0.005759
7837	0.180974	0.00672477	7837	0.152107	0.0235491	7837	-8.04771	1.60767	7787	-0.0331834	0.00576152
7836	0.180715	0.0067341	7836	0.151768	0.0235588	7836	-8.05661	1.60333	7786	-0.0332609	0.00576413
7835	0.180456	0.00674368	7835	0.151428	0.0235686	7835	-8.06541	1.59895	7785	-0.0333381	0.00576684
7834	0.180196	0.00675352	7834	0.151088	0.0235784	7834	-8.07408	1.59454	7784	-0.0334149	0.00576965
7833	0.179937	0.00676362	7833	0.150748	0.0235884	7833	-8.08265	1.5901	7783	-0.0334913	0.00577256
7832	0.179677	0.00677397	7832	0.150407	0.0235984	7832	-8.0911	1.58564	7782	-0.0335674	0.00577557
7831	0.179418	0.00678458	7831	0.150066	0.0236085	7831	-8.09944	1.58114	7781	-0.033643	0.00577867
7830	0.179158	0.00679544	7830	0.149725	0.0236187	7830	-8.10766	1.57663	7780	-0.0337183	0.00578186
7829	0.178898	0.00680656	7829	0.149383	0.023629	7829	-8.11578	1.57209	7779	-0.0337931	0.00578514
7828	0.178638	0.00681793	7828	0.149042	0.0236393	7828	-8.12378	1.56753	7778	-0.0338676	0.00578851
7827	0.178379	0.00682956	7827	0.1487	0.0236498	7827	-8.13166	1.56295	7777	-0.0339415	0.00579196
7826	0.178119	0.00684143	7826	0.148358	0.0236603	7826	-8.13944	1.55836	7776	-0.0340151	0.0057955
7825	0.177859	0.00685355	7825	0.148016	0.0236709	7825	-8.14711	1.55374	7775	-0.0340882	0.00579912
7824	0.177599	0.00686592	7824	0.147674	0.0236816	7824	-8.15467	1.54911	7774	-0.0341608	0.00580281
7823	0.17734	0.00687853	7823	0.147331	0.0236924	7823	-8.16212	1.54446	7773	-0.0342329	0.00580657
7822	0.17708	0.00689138	7822	0.146989	0.0237033	7822	-8.16947	1.5398	7772	-0.0343046	0.00581039
7821	0.17682	0.00690448	7821	0.146647	0.0237143	7821	-8.17672	1.53513	7771	-0.0343758	0.00581427
7820	0.176561	0.00691781	7820	0.146305	0.0237254	7820	-8.18387	1.53045	7770	-0.0344466	0.0058182
7819	0.176301	0.00693137	7819	0.145963	0.0237366	7819	-8.19092	1.52575	7769	-0.0345168	0.00582218
7818	0.176042	0.00694516	7818	0.145621	0.0237479	7818	-8.19788	1.52105	7768	-0.0345865	0.00582621
7817	0.175783	0.00695918	7817	0.145279	0.0237593	7817	-8.20474	1.51634	7767	-0.0346558	0.00583026
7816	0.175524	0.00697342	7816	0.144937	0.0237709	7816	-8.21151	1.51162	7766	-0.0347245	0.00583435
7815	0.175265	0.00698788	7815	0.144595	0.0237825	7815	-8.21818	1.50689	7765	-0.0347927	0.00583846
7814	0.175006	0.00700256	7814	0.144254	0.0237943	7814	-8.22477	1.50216	7764	-0.0348605	0.00584259
7813	0.174748	0.00701746	7813	0.143913	0.0238062	7813	-8.23128	1.49743	7763	-0.0349276	0.00584673
7812	0.17449	0.00703256	7812	0.143571	0.0238182	7812	-8.23769	1.49269	7762	-0.0349943	0.00585088
7811	0.174232	0.00704787	7811	0.143231	0.0238303	7811	-8.24403	1.48796	7761	-0.0350604	0.00585503
7810	0.173974	0.00706338	7810	0.14289	0.0238426	7810	-8.25028	1.48322	7760	-0.035126	0.00585918
7809	0.173716	0.00707908	7809	0.14255	0.0238549	7809	-8.25646	1.47848	7759	-0.035191	0.00586331
7808	0.173458	0.00709498	7808	0.14221	0.0238674	7808	-8.26255	1.47375	7758	-0.0352555	0.00586742
7807	0.173201	0.00711107	7807	0.14187	0.02388	7807	-8.26857	1.46902	7757	-0.0353194	0.00587152
7806	0.172944	0.00712735	7806	0.141531	0.0238927	7806	-8.27452	1.46429	7756	-0.0353827	0.00587558
7805	0.172688	0.0071438	7805	0.141192	0.0239055	7805	-8.2804	1.45957	7755	-0.0354455	0.0058796
7804	0.172431	0.00716043	7804	0.140854	0.0239185	7804	-8.2862	1.45485	7754	-0.0355077	0.00588358
7803	0.172175	0.00717723	7803	0.140516	0.0239315	7803	-8.29194	1.45014	7753	-0.0355693	0.00588751
7802	0.17192	0.0071942	7802	0.140178	0.0239447	7802	-8.29761	1.44544	7752	-0.0356303	0.00589139
7801	0.171664	0.00721132	7801	0.139841	0.023958	7801	-8.30322	1.44075	7751	-0.0356908	0.00589521
7800	0.171409	0.0072286	7800	0.139505	0.0239714	7800	-8.30876	1.43607	7750	-0.0357506	0.00589895
7799	0.171155	0.00724604	7799	0.139169	0.0239849	7799	-8.31425	1.43139	7749	-0.0358098	0.00590262
7798	0.170901	0.00726361	7798	0.138833	0.0239984	7798	-8.31967	1.42674	7748	-0.0358684	0.00590622
7797	0.170647	0.00728133	7797	0.138499	0.0240121	7797	-8.32504	1.42209	7747	-0.0359264	0.00590972
7796	0.170393	0.00729918	7796	0.138164	0.0240259	7796	-8.33035	1.41746	7746	-0.0359837	0.00591313
7795	0.17014	0.00731717	7795	0.137831	0.0240398	7795	-8.33561	1.41284	7745	-0.0360405	0.00591644
7794	0.169888	0.00733527	7794	0.137498	0.0240537	7794	-8.34082	1.40824	7744	-0.0360966	0.00591964
7793	0.169635	0.00735349	7793	0.137166	0.0240678	7793	-8.34598	1.40365	7743	-0.036152	0.00592274
7792	0.169384	0.00737183	7792	0.136834	0.0240819	7792	-8.35109	1.39909	7742	-0.0362068	0.00592571
7791	0.169133	0.00739027	7791	0.136504	0.024096	7791	-8.35615	1.39454	7741	-0.036261	0.00592855
7790	0.168882	0.00740882	7790	0.136174	0.0241103	7790	-8.36118	1.39001	7740	-0.0363144	0.00593127
7789	0.168632	0.00742746	7789	0.135845	0.0241246	7789	-8.36615	1.3855	7739	-0.0363673	0.00593385
7788	0.168382	0.00744619	7788	0.135516	0.024139	7788	-8.37109	1.38101	7738	-0.0364194	0.00593628
7787	0.168133	0.007465	7787	0.135189	0.0241534	7787	-8.37599	1.37654	7737	-0.0364709	0.00593857
7786	0.167884	0.00748389	7786	0.134862	0.0241678	7786	-8.38086	1.3721	7736	-0.0365216	0.00594069
7785	0.167636	0.00750286	7785	0.134536	0.0241823	7785	-8.38569	1.36767	7735	-0.0365717	0.00594266
7784	0.167388	0.00752189	7784	0.134212	0.0241968	7784	-8.39048	1.36328	7734	-0.0366211	0.00594446
7783	0.167141	0.00754098	7783	0.133888	0.0242114	7783	-8.39525	1.3589	7733	-0.0366698	0.00594609
7782	0.166895	0.00756012	7782	0.133565	0.0242259	7782	-8.39998	1.35455	7732	-0.0367178	0.00594753
7781	0.166649	0.00757931	7781	0.133243	0.0242405	7781	-8.40469	1.35023	7731	-0.0367651	0.0059488
7780	0.166404	0.00759855	7780	0.132922	0.024255	7780	-8.40938	1.34594	7730	-0.0368117	0.0059499
7779	0.166159	0.00761782	7779	0.132602	0.0242696	7779	-8.41404	1.34167	7729	-0.0368576	0.00595083
7778	0.165916	0.00763712	7778	0.132283	0.0242841	7778	-8.41868	1.33743	7728	-0.0369029	0.00595159
7777	0.165672	0.00765644	7777	0.131966	0.0242987	7777	-8.4233	1.33322	7727	-0.0369475	0.00595219
7776	0.16543	0.00767579	7776	0.131649	0.0243131	7776	-8.4279	1.32903	7726	-0.0369915	0.00595264
7775	0.165188	0.00769514	7775	0.131334	0.0243276	7775	-8.43248	1.32488	7725	-0.0370349	0.00595292
7774	0.164947	0.0077145	7774	0.131019	0.024342	7774	-8.43705	1.32076	7724	-0.0370777	0.00595305
7773	0.164706	0.00773386	7773	0.130706	0.0243564	7773	-8.44159	1.31667	7723	-0.0371198	0.00595303
7772	0.164467	0.0077532	7772	0.130394	0.0243707	7772	-8.44612	1.31262	7722	-0.0371614	0.00595287
7771	0.164228	0.00777253	7771	0.130083	0.024385	7771	-8.45063	1.30859	7721	-0.0372024	0.00595256
7770	0.16399	0.00779183	7770	0.129774	0.0243993	7770	-8.45511	1.30461	7720	-0.0372428	0.00595212
7769	0.163752	0.0078111	7769	0.129466	0.0244134	7769	-8.45958	1.30065	7719	-0.0372827	0.00595154
7768	0.163516	0.00783033	7768	0.129159	0.0244275	7768	-8.46403	1.29674	7718	-0.037322	0.00595083
7767	0.16328	0.00784951	7767	0.128853	0.0244416	7767	-8.46846	1.29286	7717	-0.0373608	0.00594998
7766	0.163045	0.00786864	7766	0.128549	0.0244555	7766	-8.47287	1.28901	7716	-0.0373991	0.00594902
7765	0.162811	0.00788771	7765	0.128246	0.0244694	7765	-8.47726	1.28521	7715	-0.0374369	0.00594793
7764	0.162578	0.00790671	7764	0.127944	0.0244832	7764	-8.48162	1.28144	7714	-0.0374742	0.00594672
7763	0.162345	0.00792563	7763	0.127644	0.0244969	7763	-8.48597	1.27772	7713	-0.0375111	0.0059454
7762	0.162114	0.00794447	7762	0.127345	0.0245105	7762	-8.49029	1.27404	7712	-0.0375474	0.00594396
7761	0.161883	0.00796322	7761	0.127048	0.024524	7761	-8.4946	1.2704	7711	-0.0375833	0.00594242
7760	0.161654	0.00798187	7760	0.126752	0.0245374	7760	-8.49888	1.2668	7710	-0.0376188	0.00594077
7759	0.161425	0.00800041	7759	0.126458	0.0245507	7759	-8.50314	1.26324	7709	-0.0376538	0.00593902
7758	0.161198	0.00801884	7758	0.126165	0.0245638	7758	-8.50737	1.25973	7708	-0.0376884	0.00593717
7757	0.160971	0.00803715	7757	0.125874	0.0245769	7757	-8.51159	1.25627	7707	-0.0377226	0.00593522
7756	0.160745	0.00805533	7756	0.125584	0.0245898	7756	-8.51578	1.25285	7706	-0.0377565	0.00593318
7755	0.16052	0.00807338	7755	0.125296	0.0246025	7755	-8.51994	1.24947	7705	-0.0377899	0.00593104
7754	0.160297	0.00809128	7754	0.125009	0.0246151	7754	-8.52409	1.24615	7704	-0.0378229	0.00592882
7753	0.160074	0.00810903	7753	0.124724	0.0246275	7753	-8.52821	1.24287	7703	-0.0378556	0.00592651
7752	0.159853	0.00812662	7752	0.12444	0.0246398	7752	-8.5323	1.23964	7702	-0.037888	0.00592413
7751	0.159632	0.00814405	7751	0.124159	0.0246519	7751	-8.53638	1.23646	7701	-0.03792	0.00592166
7750	0.159413	0.0081613	7750	0.123879	0.0246638	7750	-8.54042	1.23334	7700	-0.0379517	0.00591911
7749	0.159195	0.00817837	7749	0.1236	0.0246756	7749	-8.54445	1.23026	7699	-0.0379831	0.00591649
7748	0.158978	0.00819526	7748	0.123323	0.0246871	7748	-8.54845	1.22723	7698	-0.0380142	0.00591379
7747	0.158762	0.00821195	7747	0.123048	0.0246984	7747	-8.55242	1.22426	7697	-0.038045	0.00591103
7746	0.158547	0.00822844	7746	0.122775	0.0247095	7746	-8.55637	1.22134	7696	-0.0380755	0.00590819
7745	0.158333	0.00824473	7745	0.122504	0.0247204	7745	-8.56029	1.21847	7695	-0.0381058	0.00590529
7744	0.158121	0.00826079	7744	0.122234	0.0247311	7744	-8.56418	1.21566	7694	-0.0381358	0.00590233
7743	0.15791	0.00827664	7743	0.121966	0.0247415	7743	-8.56805	1.2129	7693	-0.0381656	0.0058993
7742	0.1577	0.00829225	7742	0.1217	0.0247517	7742	-8.5719	1.2102	7692	-0.0381952	0.00589622
7741	0.157491	0.00830763	7741	0.121436	0.0247616	7741	-8.57571	1.20756	7691	-0.0382245	0.00589307
7740	0.157283	0.00832276	7740	0.121174	0.0247713	7740	-8.5795	1.20497	7690	-0.0382537	0.00588987
7739	0.157077	0.00833764	7739	0.120914	0.0247807	7739	-8.58327	1.20243	7689	-0.0382826	0.00588661
7738	0.156872	0.00835226	7738	0.120655	0.0247898	7738	-8.587	1.19996	7688	-0.0383114	0.00588329
7737	0.156669	0.00836662	7737	0.120399	0.0247986	7737	-8.59071	1.19754	7687	-0.03834	0.00587992
7736	0.156466	0.00838071	7736	0.120145	0.0248071	7736	-8.59439	1.19519	7686	-0.0383685	0.0058765
7735	0.156265	0.00839452	7735	0.119892	0.0248153	7735	-8.59804	1.19289	7685	-0.0383968	0.00587301
7734	0.156066	0.00840805	7734	0.119642	0.0248232	7734	-8.60166	1.19065	7684	-0.0384249	0.00586946
7733	0.155868	0.00842129	7733	0.119393	0.0248307	7733	-8.60526	1.18847	7683	-0.0384529	0.00586584
7732	0.155671	0.00843423	7732	0.119147	0.0248379	7732	-8.60882	1.18635	7682	-0.0384808	0.00586216
7731	0.155475	0.00844688	7731	0.118903	0.0248448	7731	-8.61236	1.18429	7681	-0.0385086	0.0058584
7730	0.155281	0.00845924	7730	0.11866	0.0248514	7730	-8.61587	1.18229	7680	-0.0385363	0.00585458
7729	0.155089	0.00847131	7729	0.11842	0.0248577	7729	-8.61935	1.18036	7679	-0.0385638	0.00585068
7728	0.154897	0.00848309	7728	0.118182	0.0248636	7728	-8.62281	1.17848	7678	-0.0385913	0.0058467
7727	0.154707	0.00849459	7727	0.117946	0.0248693	7727	-8.62624	1.17667	7677	-0.0386186	0.00584264
7726	0.154519	0.00850581	7726	0.117711	0.0248746	7726	-8.62965	1.17491	7676	-0.0386459	0.00583849
7725	0.154332	0.00851675	7725	0.117479	0.0248797	7725	-8.63303	1.17322	7675	-0.0386731	0.00583426
7724	0.154146	0.00852741	7724	0.117249	0.0248845	7724	-8.63639	1.17159	7674	-0.0387003	0.00582994
7723	0.153961	0.0085378	7723	0.11702	0.024889	7723	-8.63973	1.17001	7673	-0.0387274	0.00582553
7722	0.153778	0.00854791	7722	0.116794	0.0248932	7722	-8.64305	1.1685	7672	-0.0387544	0.00582102
7721	0.153597	0.00855776	7721	0.116569	0.0248972	7721	-8.64634	1.16705	7671	-0.0387814	0.00581641
7720	0.153416	0.00856734	7720	0.116347	0.0249009	7720	-8.64961	1.16567	7670	-0.0388084	0.0058117
7719	0.153238	0.00857665	7719	0.116126	0.0249043	7719	-8.65287	1.16434	7669	-0.0388354	0.00580688
7718	0.15306	0.0085857	7718	0.115907	0.0249075	7718	-8.65611	1.16307	7668	-0.0388623	0.00580195
7717	0.152884	0.00859449	7717	0.11569	0.0249105	7717	-8.65932	1.16187	7667	-0.0388892	0.00579691
7716	0.152709	0.00860303	7716	0.115474	0.0249132	7716	-8.66252	1.16072	7666	-0.0389161	0.00579175
7715	0.152535	0.0086113	7715	0.115261	0.0249157	7715	-8.66571	1.15963	7665	-0.0389431	0.00578647
7714	0.152363	0.00861933	7714	0.115049	0.0249179	7714	-8.66887	1.15861	7664	-0.03897	0.00578106
7713	0.152193	0.0086271	7713	0.11484	0.02492	7713	-8.67203	1.15765	7663	-0.038997	0.00577553
7712	0.152023	0.00863462	7712	0.114632	0.0249218	7712	-8.67516	1.15674	7662	-0.039024	0.00576986
7711	0.151855	0.0086419	7711	0.114425	0.0249234	7711	-8.67829	1.15589	7661	-0.0390511	0.00576406
7710	0.151688	0.00864893	7710	0.114221	0.0249248	7710	-8.6814	1.15511	7660	-0.0390782	0.00575812
7709	0.151523	0.00865572	7709	0.114018	0.024926	7709	-8.6845	1.15438	7659	-0.0391054	0.00575203
7708	0.151359	0.00866227	7708	0.113817	0.024927	7708	-8.68758	1.15371	7658	-0.0391326	0.00574579
7707	0.151196	0.00866858	7707	0.113618	0.0249278	7707	-8.69066	1.1531	7657	-0.0391599	0.0057394
7706	0.151035	0.00867465	7706	0.11342	0.0249284	7706	-8.69373	1.15255	7656	-0.0391873	0.00573286
7705	0.150875	0.00868049	7705	0.113225	0.0249289	7705	-8.69678	1.15206	7655	-0.0392147	0.00572615
7704	0.150717	0.00868609	7704	0.11303	0.0249291	7704	-8.69983	1.15162	7654	-0.0392423	0.00571928
7703	0.150559	0.00869147	7703	0.112838	0.0249292	7703	-8.70287	1.15124	7653	-0.03927	0.00571224
7702	0.150403	0.00869661	7702	0.112647	0.0249291	7702	-8.7059	1.15092	7652	-0.0392978	0.00570502
7701	0.150249	0.00870152	7701	0.112458	0.0249288	7701	-8.70893	1.15065	7651	-0.0393257	0.00569763
7700	0.150095	0.00870621	7700	0.11227	0.0249283	7700	-8.71195	1.15044	7650	-0.0393537	0.00569005
7699	0.149943	0.00871067	7699	0.112084	0.0249277	7699	-8.71496	1.15029	7649	-0.0393819	0.00568229
7698	0.149793	0.00871491	7698	0.1119	0.0249269	7698	-8.71797	1.15019	7648	-0.0394102	0.00567434
7697	0.149644	0.00871893	7697	0.111717	0.024926	7697	-8.72098	1.15014	7647	-0.0394387	0.00566619
7696	0.149496	0.00872272	7696	0.111536	0.0249249	7696	-8.72398	1.15015	7646	-0.0394673	0.00565785
7695	0.149349	0.0087263	7695	0.111356	0.0249236	7695	-8.72698	1.15021	7645	-0.0394961	0.00564931
7694	0.149204	0.00872966	7694	0.111178	0.0249222	7694	-8.72998	1.15032	7644	-0.039525	0.00564057
7693	0.14906	0.0087328	7693	0.111002	0.0249206	7693	-8.73298	1.15049	7643	-0.0395541	0.00563165
7692	0.148917	0.00873573	7692	0.110826	0.0249189	7692	-8.73597	1.15071	7642	-0.0395833	0.00562255
7691	0.148776	0.00873845	7691	0.110653	0.024917	7691	-8.73897	1.15097	7641	-0.0396126	0.00561327
7690	0.148636	0.00874096	7690	0.110481	0.024915	7690	-8.74197	1.15129	7640	-0.039642	0.00560381
7689	0.148497	0.00874325	7689	0.11031	0.0249128	7689	-8.74497	1.15166	7639	-0.0396715	0.00559418
7688	0.14836	0.00874533	7688	0.110141	0.0249105	7688	-8.74798	1.15208	7638	-0.0397012	0.00558439
7687	0.148224	0.00874721	7687	0.109973	0.024908	7687	-8.75099	1.15254	7637	-0.0397308	0.00557443
7686	0.148089	0.00874889	7686	0.109807	0.0249054	7686	-8.754	1.15306	7636	-0.0397606	0.00556432
7685	0.147955	0.00875038	7685	0.109642	0.0249026	7685	-8.75701	1.15362	7635	-0.0397904	0.00555405
7684	0.147823	0.00875167	7684	0.109479	0.0248997	7684	-8.76003	1.15422	7634	-0.0398203	0.00554363
7683	0.147692	0.00875277	7683	0.109317	0.0248967	7683	-8.76305	1.15487	7633	-0.0398502	0.00553307
7682	0.147562	0.00875369	7682	0.109156	0.0248936	7682	-8.76608	1.15556	7632	-0.0398801	0.00552237
7681	0.147433	0.00875443	7681	0.108996	0.0248904	7681	-8.76911	1.15629	7631	-0.0399101	0.00551154
7680	0.147306	0.008755	7680	0.108838	0.024887	7680	-8.77215	1.15707	7630	-0.0399401	0.00550057
7679	0.147179	0.00875539	7679	0.108681	0.0248836	7679	-8.77519	1.15789	7629	-0.0399701	0.00548948
7678	0.147054	0.00875561	7678	0.108525	0.02488	7678	-8.77824	1.15874	7628	-0.0400001	0.00547827
7677	0.14693	0.00875567	7677	0.10837	0.0248763	7677	-8.7813	1.15964	7627	-0.04003	0.00546694
7676	0.146807	0.00875557	7676	0.108217	0.0248726	7676	-8.78436	1.16057	7626	-0.04006	0.0054555
7675	0.146685	0.00875532	7675	0.108064	0.0248687	7675	-8.78743	1.16153	7625	-0.0400899	0.00544396
7674	0.146564	0.00875491	7674	0.107913	0.0248648	7674	-8.79051	1.16253	7624	-0.0401198	0.00543231
7673	0.146444	0.00875435	7673	0.107763	0.0248607	7673	-8.79359	1.16357	7623	-0.0401497	0.00542056
7672	0.146325	0.00875364	7672	0.107614	0.0248566	7672	-8.79668	1.16464	7622	-0.0401794	0.00540872
7671	0.146208	0.00875279	7671	0.107466	0.0248523	7671	-8.79978	1.16574	7621	-0.0402092	0.0053968
7670	0.146091	0.00875179	7670	0.107319	0.024848	7670	-8.80289	1.16687	7620	-0.0402388	0.00538479
7669	0.145975	0.00875066	7669	0.107173	0.0248436	7669	-8.806	1.16803	7619	-0.0402684	0.0053727
7668	0.14586	0.0087494	7668	0.107027	0.0248391	7668	-8.80913	1.16922	7618	-0.0402978	0.00536053
7667	0.145746	0.008748	7667	0.106883	0.0248346	7667	-8.81227	1.17044	7617	-0.0403272	0.0053483
7666	0.145633	0.00874648	7666	0.10674	0.0248299	7666	-8.81541	1.17168	7616	-0.0403564	0.005336
7665	0.145521	0.00874483	7665	0.106597	0.0248252	7665	-8.81856	1.17295	7615	-0.0403855	0.00532364
7664	0.14541	0.00874305	7664	0.106456	0.0248204	7664	-8.82173	1.17425	7614	-0.0404145	0.00531122
7663	0.145299	0.00874116	7663	0.106315	0.0248155	7663	-8.82491	1.17557	7613	-0.0404434	0.00529875
7662	0.14519	0.00873914	7662	0.106175	0.0248105	7662	-8.82809	1.17691	7612	-0.0404721	0.00528624
7661	0.145081	0.008737	7661	0.106036	0.0248055	7661	-8.83129	1.17827	7611	-0.0405006	0.00527368
7660	0.144973	0.00873476	7660	0.105898	0.0248003	7660	-8.8345	1.17965	7610	-0.040529	0.00526108
7659	0.144866	0.00873239	7659	0.10576	0.0247951	7659	-8.83772	1.18105	7609	-0.0405572	0.00524845
7658	0.14476	0.00872992	7658	0.105623	0.0247898	7658	-8.84096	1.18247	7608	-0.0405853	0.00523579
7657	0.144654	0.00872733	7657	0.105487	0.0247844	7657	-8.8442	1.1839	7607	-0.0406131	0.0052231
7656	0.144549	0.00872464	7656	0.105351	0.024779	7656	-8.84746	1.18536	7606	-0.0406407	0.00521039
7655	0.144445	0.00872185	7655	0.105216	0.0247734	7655	-8.85073	1.18682	7605	-0.0406681	0.00519767
7654	0.144342	0.00871895	7654	0.105082	0.0247678	7654	-8.85402	1.18831	7604	-0.0406953	0.00518493
7653	0.144239	0.00871594	7653	0.104948	0.024762	7653	-8.85732	1.1898	7603	-0.0407222	0.00517218
7652	0.144137	0.00871283	7652	0.104815	0.0247562	7652	-8.86063	1.19131	7602	-0.040749	0.00515942
7651	0.144036	0.00870962	7651	0.104682	0.0247502	7651	-8.86396	1.19282	7601	-0.0407754	0.00514666
7650	0.143935	0.00870631	7650	0.10455	0.0247442	7650	-8.8673	1.19435	7600	-0.0408016	0.0051339
7649	0.143835	0.00870291	7649	0.104418	0.0247381	7649	-8.87066	1.19589	7599	-0.0408276	0.00512115
7648	0.143735	0.0086994	7648	0.104287	0.0247318	7648	-8.87404	1.19743	7598	-0.0408532	0.00510839
7647	0.143636	0.0086958	7647	0.104156	0.0247255	7647	-8.87743	1.19899	7597	-0.0408786	0.00509565
7646	0.143538	0.00869211	7646	0.104025	0.024719	7646	-8.88083	1.20055	7596	-0.0409037	0.0050829
7645	0.14344	0.00868832	7645	0.103895	0.0247124	7645	-8.88425	1.20211	7595	-0.0409285	0.00507016
7644	0.143343	0.00868443	7644	0.103766	0.0247058	7644	-8.88768	1.20368	7594	-0.0409531	0.00505742
7643	0.143246	0.00868046	7643	0.103636	0.024699	7643	-8.89112	1.20526	7593	-0.0409773	0.00504469
7642	0.14315	0.0086764	7642	0.103508	0.0246921	7642	-8.89457	1.20684	7592	-0.0410012	0.00503196
7641	0.143054	0.00867226	7641	0.103379	0.0246852	7641	-8.89802	1.20843	7591	-0.0410247	0.00501924
7640	0.142958	0.00866803	7640	0.103251	0.0246782	7640	-8.90148	1.21002	7590	-0.041048	0.00500652
7639	0.142864	0.00866373	7639	0.103123	0.0246711	7639	-8.90494	1.21162	7589	-0.0410709	0.00499381
7638	0.142769	0.00865934	7638	0.102996	0.0246639	7638	-8.9084	1.21323	7588	-0.0410935	0.0049811
7637	0.142676	0.00865488	7637	0.102869	0.0246566	7637	-8.91185	1.21483	7587	-0.0411157	0.0049684
7636	0.142582	0.00865034	7636	0.102743	0.0246493	7636	-8.9153	1.21644	7586	-0.0411376	0.0049557
7635	0.142489	0.00864573	7635	0.102617	0.024642	7635	-8.91874	1.21806	7585	-0.0411592	0.00494301
7634	0.142397	0.00864105	7634	0.102491	0.0246345	7634	-8.92218	1.21968	7584	-0.0411803	0.00493032
7633	0.142305	0.0086363	7633	0.102366	0.0246271	7633	-8.9256	1.2213	7583	-0.0412011	0.00491763
7632	0.142213	0.00863148	7632	0.102241	0.0246195	7632	-8.92901	1.22293	7582	-0.0412215	0.00490495
7631	0.142122	0.0086266	7631	0.102117	0.024612	7631	-8.93241	1.22456	7581	-0.0412416	0.00489227
7630	0.142031	0.00862165	7630	0.101993	0.0246043	7630	-8.93578	1.22619	7580	-0.0412612	0.00487959
7629	0.141941	0.00861664	7629	0.101869	0.0245967	7629	-8.93914	1.22783	7579	-0.0412804	0.00486692
7628	0.141851	0.00861156	7628	0.101746	0.024589	7628	-8.94248	1.22947	7578	-0.0412993	0.00485425
7627	0.141761	0.00860643	7627	0.101623	0.0245813	7627	-8.94579	1.23111	7577	-0.0413177	0.00484157
7626	0.141672	0.00860123	7626	0.1015	0.0245735	7626	-8.94908	1.23275	7576	-0.0413357	0.0048289
7625	0.141583	0.00859598	7625	0.101378	0.0245657	7625	-8.95234	1.2344	7575	-0.0413533	0.00481623
7624	0.141495	0.00859067	7624	0.101257	0.0245579	7624	-8.95556	1.23604	7574	-0.0413704	0.00480355
7623	0.141406	0.0085853	7623	0.101135	0.02455	7623	-8.95876	1.23769	7573	-0.0413872	0.00479088
7622	0.141319	0.00857988	7622	0.101015	0.0245422	7622	-8.96192	1.23934	7572	-0.0414034	0.0047782
7621	0.141231	0.00857441	7621	0.100894	0.0245343	7621	-8.96505	1.24099	7571	-0.0414193	0.00476551
7620	0.141144	0.00856888	7620	0.100774	0.0245264	7620	-8.96814	1.24265	7570	-0.0414346	0.00475282
7619	0.141057	0.0085633	7619	0.100655	0.0245184	7619	-8.97119	1.2443	7569	-0.0414495	0.00474013
7618	0.14097	0.00855767	7618	0.100535	0.0245104	7618	-8.97419	1.24595	7568	-0.0414639	0.00472742
7617	0.140884	0.00855198	7617	0.100416	0.0245024	7617	-8.97715	1.24761	7567	-0.0414779	0.00471471
7616	0.140798	0.00854625	7616	0.100298	0.0244944	7616	-8.98007	1.24926	7566	-0.0414913	0.00470199
7615	0.140712	0.00854047	7615	0.10018	0.0244864	7615	-8.98293	1.25092	7565	-0.0415043	0.00468926
7614	0.140627	0.00853463	7614	0.100062	0.0244783	7614	-8.98574	1.25257	7564	-0.0415168	0.00467651
7613	0.140542	0.00852875	7613	0.0999451	0.0244703	7613	-8.98851	1.25423	7563	-0.0415288	0.00466376
7612	0.140457	0.00852282	7612	0.0998283	0.0244622	7612	-8.99121	1.25588	7562	-0.0415402	0.00465098
7611	0.140372	0.00851684	7611	0.0997119	0.024454	7611	-8.99386	1.25754	7561	-0.0415512	0.0046382
7610	0.140287	0.00851081	7610	0.0995959	0.0244459	7610	-8.99645	1.25919	7560	-0.0415616	0.0046254
7609	0.140203	0.00850474	7609	0.0994802	0.0244377	7609	-8.99898	1.26084	7559	-0.0415715	0.00461258
7608	0.140119	0.00849862	7608	0.099365	0.0244295	7608	-9.00144	1.26249	7558	-0.0415808	0.00459974
7607	0.140035	0.00849245	7607	0.0992502	0.0244212	7607	-9.00384	1.26414	7557	-0.0415897	0.00458689
7606	0.139951	0.00848623	7606	0.0991358	0.0244129	7606	-9.00618	1.26579	7556	-0.041598	0.00457404
7605	0.139867	0.00847997	7605	0.0990217	0.0244046	7605	-9.00844	1.26744	7555	-0.0416058	0.00456118
7604	0.139784	0.00847366	7604	0.0989081	0.0243963	7604	-9.01063	1.26909	7554	-0.0416132	0.00454832
7603	0.139701	0.00846731	7603	0.0987949	0.0243879	7603	-9.01274	1.27073	7553	-0.04162	0.00453545
7602	0.139617	0.0084609	7602	0.0986821	0.0243794	7602	-9.01479	1.27237	7552	-0.0416263	0.0045226
7601	0.139534	0.00845446	7601	0.0985697	0.0243709	7601	-9.01675	1.27401	7551	-0.0416321	0.00450975
7600	0.139452	0.00844796	7600	0.0984577	0.0243624	7600	-9.01863	1.27565	7550	-0.0416375	0.00449692
7599	0.139369	0.00844143	7599	0.0983461	0.0243538	7599	-9.02043	1.27729	7549	-0.0416424	0.0044841
7598	0.139286	0.00843486	7598	0.0982349	0.0243452	7598	-9.02216	1.27892	7548	-0.0416468	0.0044713
7597	0.139204	0.00842826	7597	0.0981242	0.0243365	7597	-9.0238	1.28056	7547	-0.0416507	0.00445852
7596	0.139121	0.00842163	7596	0.0980139	0.0243278	7596	-9.02537	1.2822	7546	-0.0416542	0.00444578
7595	0.139039	0.00841499	7595	0.0979042	0.0243191	7595	-9.02686	1.28384	7545	-0.0416573	0.00443306
7594	0.138957	0.00840833	7594	0.0977949	0.0243103	7594	-9.02827	1.28548	7544	-0.0416598	0.00442038
7593	0.138876	0.00840166	7593	0.0976861	0.0243015	7593	-9.02961	1.28712	7543	-0.041662	0.00440775
7592	0.138794	0.00839499	7592	0.0975778	0.0242927	7592	-9.03086	1.28877	7542	-0.0416637	0.00439515
7591	0.138713	0.00838832	7591	0.0974701	0.0242838	7591	-9.03205	1.29042	7541	-0.041665	0.00438261
7590	0.138632	0.00838166	7590	0.0973629	0.024275	7590	-9.03316	1.29207	7540	-0.0416658	0.00437012
7589	0.138551	0.00837501	7589	0.0972563	0.0242661	7589	-9.03419	1.29373	7539	-0.0416662	0.00435768
7588	0.13847	0.00836838	7588	0.0971502	0.0242572	7588	-9.03515	1.2954	7538	-0.0416662	0.00434531
7587	0.138389	0.00836177	7587	0.0970448	0.0242482	7587	-9.03603	1.29707	7537	-0.0416658	0.00433301
7586	0.138309	0.00835519	7586	0.09694	0.0242393	7586	-9.03684	1.29875	7536	-0.041665	0.00432077
7585	0.138229	0.00834864	7585	0.0968358	0.0242303	7585	-9.03758	1.30044	7535	-0.0416638	0.00430862
7584	0.138149	0.00834214	7584	0.0967322	0.0242214	7584	-9.03825	1.30213	7534	-0.0416622	0.00429654
7583	0.13807	0.00833568	7583	0.0966293	0.0242124	7583	-9.03884	1.30384	7533	-0.0416602	0.00428455
7582	0.137991	0.00832926	7582	0.096527	0.0242034	7582	-9.03936	1.30555	7532	-0.0416578	0.00427264
7581	0.137912	0.0083229	7581	0.0964255	0.0241944	7581	-9.03981	1.30728	7531	-0.041655	0.00426084
7580	0.137833	0.0083166	7580	0.0963246	0.0241854	7580	-9.04019	1.30901	7530	-0.0416519	0.00424913
7579	0.137755	0.00831037	7579	0.0962244	0.0241764	7579	-9.0405	1.31076	7529	-0.0416484	0.00423752
7578	0.137677	0.00830421	7578	0.096125	0.0241673	7578	-9.04074	1.31252	7528	-0.0416445	0.00422603
7577	0.137599	0.00829812	7577	0.0960263	0.0241583	7577	-9.04091	1.31429	7527	-0.0416403	0.00421464
7576	0.137521	0.0082921	7576	0.0959284	0.0241493	7576	-9.04102	1.31607	7526	-0.0416357	0.00420338
7575	0.137444	0.00828617	7575	0.0958313	0.0241402	7575	-9.04105	1.31787	7525	-0.0416308	0.00419224
7574	0.137368	0.00828033	7574	0.0957349	0.0241312	7574	-9.04102	1.31968	7524	-0.0416255	0.00418122
7573	0.137291	0.00827458	7573	0.0956393	0.0241221	7573	-9.04092	1.32151	7523	-0.0416199	0.00417034
7572	0.137215	0.00826893	7572	0.0955446	0.024113	7572	-9.04075	1.32335	7522	-0.041614	0.00415959
7571	0.137139	0.00826338	7571	0.0954507	0.024104	7571	-9.04052	1.32521	7521	-0.0416077	0.00414899
7570	0.137064	0.00825794	7570	0.0953576	0.0240949	7570	-9.04022	1.32709	7520	-0.0416012	0.00413853
7569	0.136989	0.0082526	7569	0.0952654	0.0240858	7569	-9.03985	1.32898	7519	-0.0415943	0.00412823
7568	0.136914	0.00824738	7568	0.0951741	0.0240767	7568	-9.03943	1.33088	7518	-0.0415871	0.00411808
7567	0.13684	0.00824228	7567	0.0950837	0.0240675	7567	-9.03893	1.33281	7517	-0.0415796	0.00410809
7566	0.136766	0.00823729	7566	0.0949942	0.0240584	7566	-9.03837	1.33475	7516	-0.0415718	0.00409826
7565	0.136693	0.00823243	7565	0.0949056	0.0240492	7565	-9.03775	1.33672	7515	-0.0415637	0.00408861
7564	0.13662	0.00822771	7564	0.0948179	0.02404	7564	-9.03707	1.3387	7514	-0.0415553	0.00407913
7563	0.136547	0.00822311	7563	0.0947312	0.0240308	7563	-9.03632	1.3407	7513	-0.0415467	0.00406983
7562	0.136475	0.00821865	7562	0.0946454	0.0240216	7562	-9.03551	1.34272	7512	-0.0415378	0.00406071
7561	0.136404	0.00821432	7561	0.0945607	0.0240123	7561	-9.03464	1.34476	7511	-0.0415286	0.00405178
7560	0.136332	0.00821014	7560	0.0944769	0.0240031	7560	-9.03371	1.34682	7510	-0.0415191	0.00404305
7559	0.136262	0.0082061	7559	0.0943942	0.0239938	7559	-9.03272	1.3489	7509	-0.0415094	0.00403451
7558	0.136191	0.00820221	7558	0.0943124	0.0239844	7558	-9.03167	1.351	7508	-0.0414994	0.00402617
7557	0.136121	0.00819847	7557	0.0942317	0.0239751	7557	-9.03057	1.35313	7507	-0.0414892	0.00401803
7556	0.136052	0.00819486	7556	0.0941519	0.0239657	7556	-9.02941	1.35527	7506	-0.0414787	0.00401011
7555	0.135983	0.00819141	7555	0.0940732	0.0239563	7555	-9.02819	1.35744	7505	-0.041468	0.00400239
7554	0.135914	0.00818809	7554	0.0939954	0.023947	7554	-9.02693	1.35963	7504	-0.0414571	0.00399489
7553	0.135846	0.00818492	7553	0.0939187	0.0239376	7553	-9.02562	1.36185	7503	-0.0414459	0.0039876
7552	0.135779	0.00818189	7552	0.093843	0.0239282	7552	-9.02426	1.36408	7502	-0.0414346	0.00398052
7551	0.135712	0.00817901	7551	0.0937682	0.0239188	7551	-9.02286	1.36634	7501	-0.041423	0.00397367
7550	0.135645	0.00817627	7550	0.0936945	0.0239095	7550	-9.02141	1.36862	7500	-0.0414111	0.00396703
7549	0.135579	0.00817366	7549	0.0936217	0.0239001	7549	-9.01993	1.37092	7499	-0.0413991	0.00396061
7548	0.135514	0.0081712	7548	0.0935499	0.0238908	7548	-9.0184	1.37325	7498	-0.0413869	0.00395441
7547	0.135448	0.00816887	7547	0.0934791	0.0238815	7547	-9.01684	1.3756	7497	-0.0413745	0.00394842
7546	0.135384	0.00816668	7546	0.0934093	0.0238722	7546	-9.01525	1.37797	7496	-0.0413619	0.00394267
7545	0.13532	0.00816463	7545	0.0933405	0.0238629	7545	-9.01362	1.38037	7495	-0.0413491	0.00393713
7544	0.135256	0.0081627	7544	0.0932727	0.0238537	7544	-9.01196	1.38279	7494	-0.0413361	0.00393182
7543	0.135193	0.00816091	7543	0.0932058	0.0238445	7543	-9.01028	1.38523	7493	-0.041323	0.00392673
7542	0.135131	0.00815925	7542	0.09314	0.0238353	7542	-9.00857	1.3877	7492	-0.0413097	0.00392187
7541	0.135069	0.00815772	7541	0.093075	0.0238262	7541	-9.00683	1.39019	7491	-0.0412962	0.00391723
7540	0.135007	0.00815631	7540	0.0930111	0.0238172	7540	-9.00507	1.3927	7490	-0.0412825	0.00391281
7539	0.134946	0.00815503	7539	0.0929482	0.0238081	7539	-9.00329	1.39524	7489	-0.0412688	0.00390863
7538	0.134885	0.00815387	7538	0.0928862	0.0237992	7538	-9.0015	1.3978	7488	-0.0412548	0.00390467
7537	0.134826	0.00815283	7537	0.0928251	0.0237902	7537	-8.99968	1.40038	7487	-0.0412407	0.00390093
7536	0.134766	0.0081519	7536	0.0927651	0.0237814	7536	-8.99785	1.40298	7486	-0.0412265	0.00389743
7535	0.134707	0.00815109	7535	0.092706	0.0237725	7535	-8.99602	1.40561	7485	-0.0412121	0.00389415
7534	0.134649	0.00815038	7534	0.0926478	0.0237638	7534	-8.99417	1.40826	7484	-0.0411977	0.00389109
7533	0.134591	0.00814979	7533	0.0925906	0.0237551	7533	-8.99231	1.41093	7483	-0.0411831	0.00388827
7532	0.134534	0.0081493	7532	0.0925344	0.0237464	7532	-8.99044	1.41362	7482	-0.0411683	0.00388567
7531	0.134477	0.00814891	7531	0.0924792	0.0237378	7531	-8.98858	1.41634	7481	-0.0411535	0.00388329
7530	0.134421	0.00814862	7530	0.0924248	0.0237293	7530	-8.98671	1.41907	7480	-0.0411386	0.00388114
7529	0.134365	0.00814843	7529	0.0923715	0.0237208	7529	-8.98484	1.42183	7479	-0.0411235	0.00387922
7528	0.13431	0.00814833	7528	0.0923191	0.0237124	7528	-8.98297	1.42461	7478	-0.0411084	0.00387752
7527	0.134256	0.00814832	7527	0.0922676	0.023704	7527	-8.9811	1.42741	7477	-0.0410932	0.00387605
7526	0.134202	0.00814839	7526	0.0922171	0.0236957	7526	-8.97924	1.43022	7476	-0.0410778	0.0038748
7525	0.134149	0.00814854	7525	0.0921675	0.0236875	7525	-8.97739	1.43306	7475	-0.0410624	0.00387377
7524	0.134096	0.00814877	7524	0.0921188	0.0236793	7524	-8.97555	1.43592	7474	-0.041047	0.00387296
7523	0.134044	0.00814908	7523	0.0920711	0.0236712	7523	-8.97373	1.43879	7473	-0.0410314	0.00387237
7522	0.133992	0.00814945	7522	0.0920244	0.0236631	7522	-8.97191	1.44168	7472	-0.0410158	0.00387201
7521	0.133941	0.00814989	7521	0.0919785	0.0236551	7521	-8.97011	1.4446	7471	-0.0410002	0.00387186
7520	0.133891	0.00815039	7520	0.0919336	0.0236471	7520	-8.96833	1.44752	7470	-0.0409844	0.00387193
7519	0.133841	0.00815095	7519	0.0918897	0.0236392	7519	-8.96657	1.45047	7469	-0.0409687	0.00387222
7518	0.133792	0.00815156	7518	0.0918466	0.0236314	7518	-8.96483	1.45343	7468	-0.0409529	0.00387272
7517	0.133743	0.00815222	7517	0.0918045	0.0236236	7517	-8.96312	1.45641	7467	-0.040937	0.00387344
7516	0.133695	0.00815293	7516	0.0917633	0.0236158	7516	-8.96143	1.4594	7466	-0.0409211	0.00387437
7515	0.133648	0.00815368	7515	0.091723	0.0236081	7515	-8.95977	1.46241	7465	-0.0409052	0.00387551
7514	0.133601	0.00815446	7514	0.0916837	0.0236004	7514	-8.95814	1.46543	7464	-0.0408893	0.00387687
7513	0.133555	0.00815527	7513	0.0916453	0.0235927	7513	-8.95654	1.46847	7463	-0.0408733	0.00387843
7512	0.133509	0.00815611	7512	0.0916078	0.0235851	7512	-8.95498	1.47152	7462	-0.0408574	0.00388019
7511	0.133464	0.00815698	7511	0.0915712	0.0235776	7511	-8.95345	1.47458	7461	-0.0408414	0.00388217
7510	0.13342	0.00815786	7510	0.0915355	0.02357	7510	-8.95196	1.47766	7460	-0.0408254	0.00388434
7509	0.133376	0.00815875	7509	0.0915007	0.0235625	7509	-8.95052	1.48074	7459	-0.0408093	0.00388672
7508	0.133333	0.00815966	7508	0.0914668	0.023555	7508	-8.94911	1.48384	7458	-0.0407933	0.0038893
7507	0.133291	0.00816056	7507	0.0914339	0.0235476	7507	-8.94775	1.48695	7457	-0.0407772	0.00389208
7506	0.133249	0.00816147	7506	0.0914018	0.0235401	7506	-8.94643	1.49007	7456	-0.0407611	0.00389506
7505	0.133208	0.00816238	7505	0.0913707	0.0235327	7505	-8.94516	1.49319	7455	-0.040745	0.00389824
7504	0.133167	0.00816328	7504	0.0913405	0.0235253	7504	-8.94394	1.49633	7454	-0.0407288	0.0039016
7503	0.133127	0.00816418	7503	0.0913112	0.023518	7503	-8.94277	1.49947	7453	-0.0407126	0.00390516
7502	0.133088	0.00816508	7502	0.0912829	0.0235106	7502	-8.94165	1.50261	7452	-0.0406964	0.00390891
7501	0.13305	0.00816596	7501	0.0912555	0.0235033	7501	-8.94059	1.50576	7451	-0.0406802	0.00391285
7500	0.133012	0.00816683	7500	0.0912292	0.0234961	7500	-8.93957	1.50891	7450	-0.0406639	0.00391698
7499	0.132976	0.0081677	7499	0.0912038	0.0234889	7499	-8.93861	1.51207	7449	-0.0406476	0.00392129
7498	0.132939	0.00816854	7498	0.0911794	0.0234817	7498	-8.93771	1.51522	7448	-0.0406313	0.00392579
7497	0.132904	0.00816937	7497	0.091156	0.0234746	7497	-8.93687	1.51838	7447	-0.0406149	0.00393046
7496	0.13287	0.00817019	7496	0.0911336	0.0234675	7496	-8.93608	1.52153	7446	-0.0405985	0.00393531
7495	0.132836	0.00817098	7495	0.0911123	0.0234605	7495	-8.93536	1.52468	7445	-0.0405821	0.00394034
7494	0.132803	0.00817176	7494	0.091092	0.0234535	7494	-8.93469	1.52783	7444	-0.0405656	0.00394554
7493	0.132771	0.0081725	7493	0.0910728	0.0234466	7493	-8.93409	1.53097	7443	-0.0405491	0.00395092
7492	0.13274	0.00817323	7492	0.0910546	0.0234398	7492	-8.93355	1.53411	7442	-0.0405325	0.00395646
7491	0.13271	0.00817392	7491	0.0910375	0.023433	7491	-8.93307	1.53724	7441	-0.0405159	0.00396217
7490	0.132681	0.00817458	7490	0.0910216	0.0234263	7490	-8.93266	1.54036	7440	-0.0404993	0.00396805
7489	0.132653	0.00817522	7489	0.0910067	0.0234197	7489	-8.93232	1.54347	7439	-0.0404827	0.00397409
7488	0.132625	0.00817581	7488	0.0909929	0.0234131	7488	-8.93205	1.54657	7438	-0.0404659	0.00398029
7487	0.132599	0.00817637	7487	0.0909803	0.0234066	7487	-8.93185	1.54966	7437	-0.0404492	0.00398665
7486	0.132574	0.00817689	7486	0.0909688	0.0234001	7486	-8.93171	1.55274	7436	-0.0404324	0.00399316
7485	0.132549	0.00817737	7485	0.0909584	0.0233938	7485	-8.93165	1.5558	7435	-0.0404156	0.00399982
7484	0.132526	0.0081778	7484	0.0909493	0.0233875	7484	-8.93167	1.55884	7434	-0.0403987	0.00400664
7483	0.132503	0.00817818	7483	0.0909413	0.0233813	7483	-8.93175	1.56187	7433	-0.0403817	0.0040136
7482	0.132482	0.00817851	7482	0.0909344	0.0233751	7482	-8.93192	1.56489	7432	-0.0403648	0.00402071
7481	0.132462	0.00817879	7481	0.0909288	0.0233691	7481	-8.93216	1.56788	7431	-0.0403477	0.00402796
7480	0.132443	0.00817902	7480	0.0909244	0.0233631	7480	-8.93248	1.57085	7430	-0.0403306	0.00403535
7479	0.132425	0.00817918	7479	0.0909212	0.0233571	7479	-8.93288	1.57381	7429	-0.0403135	0.00404288
7478	0.132408	0.00817929	7478	0.0909193	0.0233513	7478	-8.93335	1.57674	7428	-0.0402963	0.00405054
7477	0.132392	0.00817933	7477	0.0909185	0.0233455	7477	-8.93392	1.57965	7427	-0.0402791	0.00405833
7476	0.132378	0.0081793	7476	0.0909191	0.0233398	7476	-8.93456	1.58253	7426	-0.0402618	0.00406626
7475	0.132364	0.00817921	7475	0.0909209	0.0233342	7475	-8.93529	1.58539	7425	-0.0402445	0.00407431
7474	0.132352	0.00817904	7474	0.090924	0.0233286	7474	-8.9361	1.58822	7424	-0.0402271	0.00408248
7473	0.132341	0.00817879	7473	0.0909284	0.0233231	7473	-8.93701	1.59103	7423	-0.0402096	0.00409078
7472	0.132331	0.00817847	7472	0.0909341	0.0233177	7472	-8.93799	1.5938	7422	-0.0401921	0.00409919
7471	0.132323	0.00817806	7471	0.0909411	0.0233123	7471	-8.93907	1.59655	7421	-0.0401745	0.00410773
7470	0.132315	0.00817757	7470	0.0909494	0.023307	7470	-8.94024	1.59927	7420	-0.0401569	0.00411637
7469	0.132309	0.00817699	7469	0.0909591	0.0233018	7469	-8.9415	1.60196	7419	-0.0401391	0.00412512
7468	0.132305	0.00817631	7468	0.0909701	0.0232966	7468	-8.94286	1.60461	7418	-0.0401213	0.00413399
7467	0.132301	0.00817555	7467	0.0909825	0.0232915	7467	-8.94431	1.60724	7417	-0.0401034	0.00414296
7466	0.132299	0.00817469	7466	0.0909963	0.0232864	7466	-8.94585	1.60982	7416	-0.0400854	0.00415203
7465	0.132299	0.00817372	7465	0.0910114	0.0232814	7465	-8.94749	1.61238	7415	-0.0400672	0.00416119
7464	0.132299	0.00817265	7464	0.091028	0.0232765	7464	-8.94923	1.6149	7414	-0.040049	0.00417046
7463	0.132301	0.00817148	7463	0.0910459	0.0232716	7463	-8.95107	1.61738	7413	-0.0400306	0.00417982
7462	0.132305	0.0081702	7462	0.0910653	0.0232668	7462	-8.95301	1.61983	7412	-0.0400121	0.00418927
7461	0.13231	0.00816882	7461	0.0910861	0.023262	7461	-8.95503	1.62224	7411	-0.0399934	0.00419881
7460	0.132316	0.00816734	7460	0.0911083	0.0232572	7460	-8.95715	1.62463	7410	-0.0399746	0.00420843
7459	0.132323	0.00816577	7459	0.0911319	0.0232526	7459	-8.95935	1.62698	7409	-0.0399556	0.00421813
7458	0.132332	0.0081641	7458	0.091157	0.023248	7458	-8.96164	1.6293	7408	-0.0399365	0.00422791
7457	0.132343	0.00816235	7457	0.0911836	0.0232434	7457	-8.96401	1.6316	7407	-0.0399172	0.00423776
7456	0.132355	0.00816051	7456	0.0912115	0.0232389	7456	-8.96645	1.63386	7406	-0.0398977	0.00424769
7455	0.132368	0.00815858	7455	0.091241	0.0232345	7455	-8.96897	1.63611	7405	-0.039878	0.00425768
7454	0.132383	0.00815657	7454	0.0912718	0.0232302	7454	-8.97156	1.63832	7404	-0.0398581	0.00426774
7453	0.132399	0.00815448	7453	0.0913042	0.0232259	7453	-8.97421	1.64052	7403	-0.039838	0.00427786
7452	0.132416	0.00815232	7452	0.091338	0.0232217	7452	-8.97693	1.6427	7402	-0.0398177	0.00428803
7451	0.132435	0.00815009	7451	0.0913733	0.0232176	7451	-8.97972	1.64485	7401	-0.0397972	0.00429826
7450	0.132456	0.00814779	7450	0.0914101	0.0232136	7450	-8.98256	1.64699	7400	-0.0397764	0.00430855
7449	0.132478	0.00814542	7449	0.0914483	0.0232096	7449	-8.98545	1.6491	7399	-0.0397555	0.00431887
7448	0.132501	0.00814298	7448	0.0914881	0.0232057	7448	-8.9884	1.65121	7398	-0.0397342	0.00432925
7447	0.132526	0.00814049	7447	0.0915293	0.0232019	7447	-8.99139	1.65329	7397	-0.0397127	0.00433966
7446	0.132552	0.00813794	7446	0.0915721	0.0231982	7446	-8.99444	1.65537	7396	-0.039691	0.00435011
7445	0.13258	0.00813533	7445	0.0916163	0.0231945	7445	-8.99752	1.65743	7395	-0.039669	0.00436059
7444	0.132609	0.00813267	7444	0.0916621	0.0231909	7444	-9.00064	1.65947	7394	-0.0396467	0.0043711
7443	0.132639	0.00812996	7443	0.0917094	0.0231874	7443	-9.0038	1.66151	7393	-0.0396241	0.00438164
7442	0.132671	0.0081272	7442	0.0917582	0.023184	7442	-9.00699	1.66354	7392	-0.0396013	0.00439219
7441	0.132705	0.0081244	7441	0.0918085	0.0231806	7441	-9.01021	1.66556	7391	-0.0395781	0.00440277
7440	0.13274	0.00812155	7440	0.0918604	0.0231774	7440	-9.01346	1.66758	7390	-0.0395546	0.00441336
7439	0.132776	0.00811867	7439	0.0919138	0.0231742	7439	-9.01673	1.66959	7389	-0.0395309	0.00442395
7438	0.132814	0.00811575	7438	0.0919687	0.023171	7438	-9.02002	1.67159	7388	-0.0395067	0.00443456
7437	0.132854	0.00811279	7437	0.0920252	0.023168	7437	-9.02333	1.67359	7387	-0.0394823	0.00444517
7436	0.132895	0.0081098	7436	0.0920833	0.023165	7436	-9.02666	1.67559	7386	-0.0394575	0.00445577
7435	0.132937	0.00810679	7435	0.0921429	0.0231621	7435	-9.02999	1.67759	7385	-0.0394324	0.00446637
7434	0.132981	0.00810374	7434	0.092204	0.0231593	7434	-9.03333	1.67958	7384	-0.039407	0.00447696
7433	0.133027	0.00810067	7433	0.0922668	0.0231565	7433	-9.03667	1.68158	7383	-0.0393811	0.00448754
7432	0.133074	0.00809757	7432	0.0923311	0.0231538	7432	-9.04002	1.68358	7382	-0.0393549	0.0044981
7431	0.133122	0.00809446	7431	0.092397	0.0231511	7431	-9.04336	1.68557	7381	-0.0393283	0.00450863
7430	0.133172	0.00809132	7430	0.0924645	0.0231485	7430	-9.0467	1.68758	7380	-0.0393014	0.00451914
7429	0.133224	0.00808817	7429	0.0925336	0.023146	7429	-9.05003	1.68958	7379	-0.039274	0.00452963
7428	0.133277	0.008085	7428	0.0926043	0.0231435	7428	-9.05335	1.69159	7378	-0.0392463	0.00454007
7427	0.133332	0.00808181	7427	0.0926766	0.0231411	7427	-9.05666	1.6936	7377	-0.0392181	0.00455048
7426	0.133388	0.00807862	7426	0.0927505	0.0231387	7426	-9.05995	1.69562	7376	-0.0391895	0.00456083
7425	0.133446	0.00807541	7425	0.092826	0.0231364	7425	-9.06321	1.69765	7375	-0.0391606	0.00457113
7424	0.133505	0.00807219	7424	0.0929031	0.0231341	7424	-9.06645	1.69968	7374	-0.0391312	0.00458137
7423	0.133566	0.00806897	7423	0.0929818	0.0231318	7423	-9.06967	1.70173	7373	-0.0391014	0.00459154
7422	0.133628	0.00806574	7422	0.0930622	0.0231296	7422	-9.07285	1.70378	7372	-0.0390711	0.00460164
7421	0.133692	0.0080625	7421	0.0931442	0.0231274	7421	-9.076	1.70583	7371	-0.0390405	0.00461165
7420	0.133757	0.00805926	7420	0.0932279	0.0231253	7420	-9.07912	1.7079	7370	-0.0390094	0.00462158
7419	0.133824	0.008056	7419	0.0933132	0.0231232	7419	-9.08219	1.70997	7369	-0.0389778	0.00463142
7418	0.133893	0.00805274	7418	0.0934002	0.0231211	7418	-9.08521	1.71206	7368	-0.0389458	0.00464115
7417	0.133963	0.00804946	7417	0.0934888	0.0231191	7417	-9.08819	1.71414	7367	-0.0389134	0.00465078
7416	0.134035	0.00804618	7416	0.0935791	0.0231171	7416	-9.09111	1.71624	7366	-0.0388805	0.0046603
7415	0.134108	0.00804287	7415	0.0936711	0.0231152	7415	-9.09398	1.71834	7365	-0.0388471	0.0046697
7414	0.134183	0.00803956	7414	0.0937648	0.0231133	7414	-9.09679	1.72045	7364	-0.0388133	0.00467897
7413	0.134259	0.00803622	7413	0.0938601	0.0231114	7413	-9.09953	1.72256	7363	-0.038779	0.00468811
7412	0.134337	0.00803287	7412	0.0939572	0.0231096	7412	-9.10221	1.72468	7362	-0.0387442	0.00469712
7411	0.134416	0.0080295	7411	0.0940559	0.0231079	7411	-9.10482	1.7268	7361	-0.038709	0.00470598
7410	0.134497	0.00802611	7410	0.0941564	0.0231061	7410	-9.10735	1.72892	7360	-0.0386733	0.00471469
7409	0.13458	0.00802269	7409	0.0942586	0.0231045	7409	-9.1098	1.73105	7359	-0.038637	0.00472324
7408	0.134664	0.00801925	7408	0.0943625	0.0231028	7408	-9.11217	1.73318	7358	-0.0386003	0.00473163
7407	0.134749	0.00801579	7407	0.0944682	0.0231012	7407	-9.11446	1.73531	7357	-0.0385631	0.00473984
7406	0.134836	0.00801229	7406	0.0945755	0.0230997	7406	-9.11665	1.73745	7356	-0.0385254	0.00474789
7405	0.134925	0.00800877	7405	0.0946847	0.0230982	7405	-9.11875	1.73958	7355	-0.0384871	0.00475575
7404	0.135015	0.00800522	7404	0.0947955	0.0230967	7404	-9.12076	1.74172	7354	-0.0384484	0.00476342
7403	0.135107	0.00800163	7403	0.0949082	0.0230953	7403	-9.12266	1.74385	7353	-0.0384091	0.0047709
7402	0.1352	0.007998	7402	0.0950226	0.0230939	7402	-9.12446	1.74598	7352	-0.0383694	0.00477818
7401	0.135295	0.00799434	7401	0.0951388	0.0230925	7401	-9.12616	1.7481	7351	-0.038329	0.00478526
7400	0.135391	0.00799063	7400	0.0952567	0.0230912	7400	-9.12774	1.75023	7350	-0.0382882	0.00479212
7399	0.135489	0.00798689	7399	0.0953765	0.0230899	7399	-9.1292	1.75235	7349	-0.0382468	0.00479876
7398	0.135588	0.0079831	7398	0.095498	0.0230887	7398	-9.13055	1.75446	7348	-0.0382049	0.00480518
7397	0.135689	0.00797926	7397	0.0956213	0.0230875	7397	-9.13177	1.75657	7347	-0.0381624	0.00481137
7396	0.135791	0.00797538	7396	0.0957465	0.0230863	7396	-9.13287	1.75866	7346	-0.0381194	0.00481732
7395	0.135895	0.00797144	7395	0.0958734	0.0230851	7395	-9.13383	1.76075	7345	-0.0380758	0.00482303
7394	0.136	0.00796745	7394	0.0960022	0.0230839	7394	-9.13466	1.76283	7344	-0.0380317	0.0048285
7393	0.136107	0.00796341	7393	0.0961328	0.0230828	7393	-9.13536	1.7649	7343	-0.0379869	0.00483371
7392	0.136216	0.0079593	7392	0.0962652	0.0230817	7392	-9.13591	1.76696	7342	-0.0379417	0.00483867
7391	0.136326	0.00795514	7391	0.0963995	0.0230806	7391	-9.13632	1.76901	7341	-0.0378958	0.00484336
7390	0.136437	0.00795091	7390	0.0965356	0.0230795	7390	-9.13658	1.77104	7340	-0.0378493	0.00484778
7389	0.13655	0.00794662	7389	0.0966736	0.0230784	7389	-9.13669	1.77305	7339	-0.0378023	0.00485193
7388	0.136665	0.00794225	7388	0.0968134	0.0230773	7388	-9.13664	1.77505	7338	-0.0377547	0.0048558
7387	0.136781	0.00793782	7387	0.0969551	0.0230762	7387	-9.13643	1.77703	7337	-0.0377065	0.00485938
7386	0.136898	0.00793331	7386	0.0970987	0.0230751	7386	-9.13606	1.77899	7336	-0.0376577	0.00486267
7385	0.137018	0.00792873	7385	0.0972441	0.023074	7385	-9.13552	1.78093	7335	-0.0376082	0.00486567
7384	0.137138	0.00792407	7384	0.0973915	0.0230729	7384	-9.13481	1.78285	7334	-0.0375582	0.00486837
7383	0.13726	0.00791933	7383	0.0975407	0.0230718	7383	-9.13393	1.78475	7333	-0.0375075	0.00487077
7382	0.137384	0.00791451	7382	0.0976919	0.0230706	7382	-9.13286	1.78662	7332	-0.0374563	0.00487285
7381	0.137509	0.0079096	7381	0.0978449	0.0230694	7381	-9.13162	1.78847	7331	-0.0374044	0.00487463
7380	0.137636	0.00790461	7380	0.0979999	0.0230683	7380	-9.13019	1.79029	7330	-0.0373518	0.00487608
7379	0.137764	0.00789952	7379	0.0981567	0.023067	7379	-9.12857	1.79209	7329	-0.0372987	0.00487723
7378	0.137893	0.00789435	7378	0.0983155	0.0230658	7378	-9.12676	1.79385	7328	-0.037245	0.00487807
7377	0.138024	0.0078891	7377	0.0984762	0.0230645	7377	-9.12476	1.79559	7327	-0.0371906	0.00487862
7376	0.138157	0.00788377	7376	0.0986388	0.0230632	7376	-9.12257	1.79729	7326	-0.0371357	0.00487888
7375	0.138291	0.00787837	7375	0.0988032	0.0230619	7375	-9.12018	1.79897	7325	-0.0370802	0.00487886
7374	0.138426	0.00787289	7374	0.0989695	0.0230606	7374	-9.1176	1.80061	7324	-0.0370242	0.00487856
7373	0.138563	0.00786735	7373	0.0991377	0.0230593	7373	-9.11483	1.80221	7323	-0.0369676	0.004878
7372	0.138701	0.00786176	7372	0.0993076	0.023058	7372	-9.11185	1.80378	7322	-0.0369105	0.00487718
7371	0.138841	0.0078561	7371	0.0994794	0.0230567	7371	-9.10869	1.80531	7321	-0.0368529	0.00487611
7370	0.138982	0.0078504	7370	0.0996531	0.0230554	7370	-9.10532	1.8068	7320	-0.0367947	0.00487479
7369	0.139124	0.00784464	7369	0.0998285	0.0230542	7369	-9.10175	1.80826	7319	-0.0367361	0.00487325
7368	0.139267	0.00783885	7368	0.100006	0.0230529	7368	-9.09799	1.80967	7318	-0.036677	0.00487147
7367	0.139412	0.00783301	7367	0.100185	0.0230517	7367	-9.09402	1.81105	7317	-0.0366174	0.00486948
7366	0.139558	0.00782714	7366	0.100365	0.0230505	7366	-9.08985	1.81238	7316	-0.0365574	0.00486727
7365	0.139706	0.00782123	7365	0.100548	0.0230494	7365	-9.08548	1.81366	7315	-0.036497	0.00486487
7364	0.139855	0.00781531	7364	0.100732	0.0230483	7364	-9.0809	1.8149	7314	-0.0364361	0.00486226
7363	0.140004	0.00780936	7363	0.100918	0.0230472	7363	-9.07612	1.8161	7313	-0.0363748	0.00485947
7362	0.140156	0.00780339	7362	0.101106	0.0230461	7362	-9.07114	1.81724	7312	-0.0363131	0.0048565
7361	0.140308	0.00779741	7361	0.101295	0.0230451	7361	-9.06595	1.81834	7311	-0.036251	0.00485336
7360	0.140461	0.00779141	7360	0.101486	0.0230442	7360	-9.06054	1.81939	7310	-0.0361886	0.00485006
7359	0.140616	0.00778542	7359	0.101679	0.0230433	7359	-9.05494	1.82038	7309	-0.0361257	0.0048466
7358	0.140772	0.00777942	7358	0.101873	0.0230425	7358	-9.04912	1.82132	7308	-0.0360625	0.00484299
7357	0.140929	0.00777342	7357	0.102069	0.0230417	7357	-9.04309	1.82221	7307	-0.035999	0.00483924
7356	0.141087	0.00776743	7356	0.102267	0.023041	7356	-9.03685	1.82304	7306	-0.0359352	0.00483536
7355	0.141246	0.00776145	7355	0.102466	0.0230403	7355	-9.03039	1.82381	7305	-0.035871	0.00483136
7354	0.141406	0.00775549	7354	0.102667	0.0230397	7354	-9.02373	1.82453	7304	-0.0358066	0.00482724
7353	0.141568	0.00774954	7353	0.102869	0.0230392	7353	-9.01684	1.82519	7303	-0.0357418	0.00482302
7352	0.14173	0.00774361	7352	0.103073	0.0230387	7352	-9.00975	1.82578	7302	-0.0356768	0.00481869
7351	0.141893	0.00773771	7351	0.103279	0.0230383	7351	-9.00243	1.82632	7301	-0.0356115	0.00481427
7350	0.142058	0.00773184	7350	0.103486	0.0230379	7350	-8.9949	1.82678	7300	-0.035546	0.00480977
7349	0.142223	0.007726	7349	0.103695	0.0230377	7349	-8.98715	1.82719	7299	-0.0354802	0.00480519
7348	0.142389	0.00772019	7348	0.103905	0.0230375	7348	-8.97918	1.82753	7298	-0.0354142	0.00480054
7347	0.142557	0.00771443	7347	0.104117	0.0230373	7347	-8.97099	1.8278	7297	-0.035348	0.00479583
7346	0.142725	0.0077087	7346	0.10433	0.0230373	7346	-8.96258	1.828	7296	-0.0352816	0.00479107
7345	0.142894	0.00770302	7345	0.104545	0.0230373	7345	-8.95395	1.82813	7295	-0.0352151	0.00478626
7344	0.143064	0.00769739	7344	0.104761	0.0230374	7344	-8.94509	1.82818	7294	-0.0351483	0.00478142
7343	0.143235	0.00769182	7343	0.104979	0.0230375	7343	-8.93601	1.82817	7293	-0.0350814	0.00477654
7342	0.143407	0.00768629	7342	0.105198	0.0230377	7342	-8.92671	1.82808	7292	-0.0350143	0.00477164
7341	0.14358	0.00768082	7341	0.105419	0.023038	7341	-8.91718	1.82791	7291	-0.0349471	0.00476672
7340	0.143753	0.00767542	7340	0.105641	0.0230383	7340	-8.90742	1.82767	7290	-0.0348798	0.0047618
7339	0.143928	0.00767008	7339	0.105865	0.0230387	7339	-8.89743	1.82735	7289	-0.0348123	0.00475687
7338	0.144103	0.0076648	7338	0.10609	0.0230392	7338	-8.88722	1.82695	7288	-0.0347448	0.00475195
7337	0.144279	0.00765959	7337	0.106316	0.0230397	7337	-8.87677	1.82646	7287	-0.0346772	0.00474704
7336	0.144456	0.00765445	7336	0.106544	0.0230403	7336	-8.86609	1.8259	7286	-0.0346095	0.00474215
7335	0.144633	0.00764938	7335	0.106773	0.023041	7335	-8.85518	1.82525	7285	-0.0345418	0.00473729
7334	0.144812	0.00764439	7334	0.107004	0.0230417	7334	-8.84404	1.82451	7284	-0.034474	0.00473245
7333	0.144991	0.00763947	7333	0.107235	0.0230425	7333	-8.83267	1.82369	7283	-0.0344061	0.00472765
7332	0.14517	0.00763464	7332	0.107469	0.0230433	7332	-8.82106	1.82278	7282	-0.0343383	0.00472288
7331	0.145351	0.00762989	7331	0.107703	0.0230442	7331	-8.80921	1.82178	7281	-0.0342704	0.00471814
7330	0.145532	0.00762522	7330	0.107939	0.0230451	7330	-8.79713	1.82069	7280	-0.0342025	0.00471345
7329	0.145713	0.00762063	7329	0.108176	0.0230461	7329	-8.78482	1.81952	7279	-0.0341346	0.00470881
7328	0.145896	0.00761613	7328	0.108414	0.0230471	7328	-8.77227	1.81825	7278	-0.0340668	0.00470421
7327	0.146079	0.00761172	7327	0.108654	0.0230482	7327	-8.75951	1.81691	7277	-0.033999	0.00469967
7326	0.146262	0.0076074	7326	0.108895	0.0230494	7326	-8.74653	1.81547	7276	-0.0339312	0.00469518
7325	0.146447	0.00760317	7325	0.109137	0.0230507	7325	-8.73333	1.81396	7275	-0.0338635	0.00469075
7324	0.146631	0.00759903	7324	0.10938	0.023052	7324	-8.71992	1.81237	7274	-0.0337958	0.00468638
7323	0.146817	0.00759499	7323	0.109624	0.0230534	7323	-8.70631	1.8107	7273	-0.0337282	0.00468207
7322	0.147003	0.00759104	7322	0.10987	0.0230549	7322	-8.6925	1.80895	7272	-0.0336608	0.00467783
7321	0.147189	0.00758718	7321	0.110116	0.0230565	7321	-8.67849	1.80713	7271	-0.0335934	0.00467366
7320	0.147377	0.00758343	7320	0.110364	0.0230581	7320	-8.6643	1.80524	7270	-0.0335261	0.00466956
7319	0.147564	0.00757976	7319	0.110613	0.0230599	7319	-8.64991	1.80328	7269	-0.0334589	0.00466554
7318	0.147753	0.0075762	7318	0.110862	0.0230618	7318	-8.63535	1.80125	7268	-0.0333919	0.00466159
7317	0.147941	0.00757274	7317	0.111113	0.0230637	7317	-8.62061	1.79915	7267	-0.0333251	0.00465772
7316	0.148131	0.00756937	7316	0.111365	0.0230658	7316	-8.60569	1.79699	7266	-0.0332584	0.00465393
7315	0.14832	0.00756611	7315	0.111617	0.0230679	7315	-8.59061	1.79477	7265	-0.0331918	0.00465022
7314	0.148511	0.00756294	7314	0.111871	0.0230702	7314	-8.57536	1.79248	7264	-0.0331255	0.0046466
7313	0.148702	0.00755988	7313	0.112125	0.0230726	7313	-8.55996	1.79014	7263	-0.0330593	0.00464306
7312	0.148893	0.00755691	7312	0.112381	0.0230751	7312	-8.5444	1.78773	7262	-0.0329933	0.00463961
7311	0.149085	0.00755405	7311	0.112637	0.0230777	7311	-8.52869	1.78528	7261	-0.0329276	0.00463626
7310	0.149277	0.00755129	7310	0.112894	0.0230804	7310	-8.51284	1.78277	7260	-0.0328621	0.00463299
7309	0.149469	0.00754863	7309	0.113152	0.0230832	7309	-8.49685	1.78021	7259	-0.0327968	0.00462982
7308	0.149662	0.00754606	7308	0.113411	0.0230861	7308	-8.48072	1.77759	7258	-0.0327318	0.00462674
7307	0.149856	0.0075436	7307	0.11367	0.0230892	7307	-8.46446	1.77494	7257	-0.032667	0.00462375
7306	0.15005	0.00754124	7306	0.11393	0.0230923	7306	-8.44807	1.77223	7256	-0.0326025	0.00462087
7305	0.150244	0.00753897	7305	0.114191	0.0230956	7305	-8.43156	1.76948	7255	-0.0325383	0.00461808
7304	0.150439	0.0075368	7304	0.114453	0.023099	7304	-8.41494	1.76669	7254	-0.0324744	0.00461539
7303	0.150634	0.00753473	7303	0.114715	0.0231025	7303	-8.3982	1.76386	7253	-0.0324108	0.0046128
7302	0.150829	0.00753276	7302	0.114978	0.0231061	7302	-8.38135	1.76098	7252	-0.0323475	0.0046103
7301	0.151025	0.00753088	7301	0.115242	0.0231098	7301	-8.3644	1.75807	7251	-0.0322845	0.00460791
7300	0.151221	0.0075291	7300	0.115506	0.0231137	7300	-8.34735	1.75513	7250	-0.0322219	0.00460563
7299	0.151417	0.00752741	7299	0.115771	0.0231176	7299	-8.33021	1.75215	7249	-0.0321597	0.00460344
7298	0.151614	0.00752581	7298	0.116036	0.0231217	7298	-8.31298	1.74914	7248	-0.0320978	0.00460135
7297	0.151811	0.0075243	7297	0.116302	0.0231258	7297	-8.29566	1.7461	7247	-0.0320362	0.00459937
7296	0.152009	0.00752288	7296	0.116568	0.0231301	7296	-8.27826	1.74303	7246	-0.0319751	0.00459749
7295	0.152206	0.00752154	7295	0.116835	0.0231344	7295	-8.26078	1.73993	7245	-0.0319144	0.00459571
7294	0.152404	0.0075203	7294	0.117102	0.0231389	7294	-8.24324	1.73681	7244	-0.0318541	0.00459403
7293	0.152602	0.00751913	7293	0.11737	0.0231434	7293	-8.22562	1.73367	7243	-0.0317942	0.00459244
7292	0.152801	0.00751805	7292	0.117638	0.0231481	7292	-8.20795	1.7305	7242	-0.0317347	0.00459094
7291	0.152999	0.00751705	7291	0.117906	0.0231528	7291	-8.19022	1.72731	7241	-0.0316757	0.00458953
7290	0.153198	0.00751613	7290	0.118175	0.0231576	7290	-8.17243	1.7241	7240	-0.0316171	0.00458821
7289	0.153398	0.00751529	7289	0.118444	0.0231625	7289	-8.1546	1.72087	7239	-0.031559	0.00458696
7288	0.153597	0.00751452	7288	0.118714	0.0231675	7288	-8.13672	1.71763	7238	-0.0315014	0.0045858
7287	0.153796	0.00751382	7287	0.118983	0.0231726	7287	-8.1188	1.71438	7237	-0.0314443	0.00458471
7286	0.153996	0.00751319	7286	0.119254	0.0231777	7286	-8.10085	1.7111	7236	-0.0313877	0.00458369
7285	0.154196	0.00751263	7285	0.119524	0.0231829	7285	-8.08286	1.70782	7235	-0.0313316	0.00458274
7284	0.154396	0.00751214	7284	0.119794	0.0231881	7284	-8.06486	1.70453	7234	-0.031276	0.00458185
7283	0.154597	0.00751171	7283	0.120065	0.0231935	7283	-8.04682	1.70122	7233	-0.0312209	0.00458103
7282	0.154797	0.00751135	7282	0.120336	0.0231989	7282	-8.02877	1.6979	7232	-0.0311664	0.00458026
7281	0.154997	0.00751106	7281	0.120607	0.0232044	7281	-8.01071	1.69457	7231	-0.0311124	0.00457955
7280	0.155198	0.00751083	7280	0.120878	0.0232099	7280	-7.99264	1.69123	7230	-0.031059	0.00457889
7279	0.155399	0.00751066	7279	0.121149	0.0232156	7279	-7.97456	1.68788	7229	-0.0310062	0.00457828
7278	0.1556	0.00751054	7278	0.121421	0.0232213	7278	-7.95647	1.68452	7228	-0.030954	0.00457771
7277	0.155801	0.00751049	7277	0.121692	0.023227	7277	-7.93839	1.68115	7227	-0.0309024	0.00457719
7276	0.156002	0.00751049	7276	0.121964	0.0232328	7276	-7.92032	1.67778	7226	-0.0308514	0.0045767
7275	0.156203	0.00751055	7275	0.122235	0.0232387	7275	-7.90225	1.67439	7225	-0.030801	0.00457624
7274	0.156404	0.00751066	7274	0.122506	0.0232447	7274	-7.88421	1.671	7224	-0.0307512	0.00457581
7273	0.156605	0.00751082	7273	0.122778	0.0232507	7273	-7.86617	1.6676	7223	-0.0307021	0.00457541
7272	0.156806	0.00751104	7272	0.123049	0.0232568	7272	-7.84817	1.66419	7222	-0.0306537	0.00457504
7271	0.157007	0.0075113	7271	0.12332	0.0232629	7271	-7.83018	1.66077	7221	-0.0306059	0.00457469
7270	0.157209	0.0075116	7270	0.123591	0.0232691	7270	-7.81223	1.65735	7220	-0.0305588	0.00457436
7269	0.15741	0.00751195	7269	0.123862	0.0232753	7269	-7.79432	1.65392	7219	-0.0305123	0.00457407
7268	0.157611	0.00751234	7268	0.124133	0.0232816	7268	-7.77644	1.65048	7218	-0.0304664	0.00457381
7267	0.157812	0.00751276	7267	0.124404	0.0232879	7267	-7.7586	1.64704	7217	-0.0304212	0.00457359
7266	0.158013	0.00751323	7266	0.124674	0.0232942	7266	-7.74081	1.64359	7216	-0.0303767	0.0045734
7265	0.158214	0.00751372	7265	0.124944	0.0233006	7265	-7.72308	1.64013	7215	-0.0303328	0.00457326
7264	0.158415	0.00751425	7264	0.125214	0.023307	7264	-7.7054	1.63667	7214	-0.0302896	0.00457315
7263	0.158616	0.00751481	7263	0.125484	0.0233135	7263	-7.68777	1.6332	7213	-0.0302469	0.00457309
7262	0.158817	0.0075154	7262	0.125753	0.0233199	7262	-7.67021	1.62972	7212	-0.030205	0.00457308
7261	0.159018	0.007516	7261	0.126022	0.0233264	7261	-7.65272	1.62624	7211	-0.0301636	0.00457313
7260	0.159218	0.00751663	7260	0.126291	0.0233329	7260	-7.6353	1.62276	7210	-0.030123	0.00457322
7259	0.159419	0.00751728	7259	0.12656	0.0233394	7259	-7.61796	1.61926	7209	-0.0300829	0.00457337
7258	0.159619	0.00751794	7258	0.126827	0.0233459	7258	-7.60069	1.61576	7208	-0.0300435	0.00457358
7257	0.159819	0.00751862	7257	0.127095	0.0233524	7257	-7.58351	1.61226	7207	-0.0300047	0.00457385
7256	0.160019	0.0075193	7256	0.127362	0.0233589	7256	-7.56642	1.60874	7206	-0.0299665	0.00457419
7255	0.160219	0.00751999	7255	0.127629	0.0233654	7255	-7.54941	1.60522	7205	-0.029929	0.0045746
7254	0.160419	0.00752069	7254	0.127895	0.0233719	7254	-7.53251	1.6017	7204	-0.0298921	0.00457507
7253	0.160618	0.00752138	7253	0.12816	0.0233783	7253	-7.5157	1.59816	7203	-0.0298558	0.00457562
7252	0.160818	0.00752208	7252	0.128426	0.0233847	7252	-7.499	1.59462	7202	-0.0298202	0.00457624
7251	0.161017	0.00752276	7251	0.12869	0.0233911	7251	-7.48241	1.59108	7201	-0.0297852	0.00457695
7250	0.161215	0.00752344	7250	0.128954	0.0233974	7250	-7.46593	1.58752	7200	-0.0297508	0.00457774
7249	0.161414	0.00752411	7249	0.129217	0.0234037	7249	-7.44956	1.58396	7199	-0.029717	0.00457861
7248	0.161612	0.00752476	7248	0.12948	0.0234099	7248	-7.43332	1.58039	7198	-0.0296838	0.00457956
7247	0.16181	0.00752539	7247	0.129742	0.023416	7247	-7.4172	1.57681	7197	-0.0296513	0.00458061
7246	0.162008	0.00752601	7246	0.130003	0.0234221	7246	-7.4012	1.57322	7196	-0.0296193	0.00458176
7245	0.162206	0.00752659	7245	0.130264	0.0234281	7245	-7.38534	1.56963	7195	-0.029588	0.00458299
7244	0.162403	0.00752715	7244	0.130524	0.023434	7244	-7.36961	1.56603	7194	-0.0295573	0.00458433
7243	0.1626	0.00752767	7243	0.130783	0.0234399	7243	-7.354	1.56242	7193	-0.0295272	0.00458577
7242	0.162796	0.00752816	7242	0.131042	0.0234457	7242	-7.33853	1.55881	7192	-0.0294977	0.00458731
7241	0.162992	0.0075286	7241	0.131299	0.0234513	7241	-7.32319	1.55519	7191	-0.0294688	0.00458896
7240	0.163188	0.007529	7240	0.131556	0.0234569	7240	-7.30798	1.55157	7190	-0.0294405	0.00459072
7239	0.163384	0.00752935	7239	0.131812	0.0234624	7239	-7.29291	1.54795	7189	-0.0294129	0.00459259
7238	0.163579	0.00752965	7238	0.132067	0.0234678	7238	-7.27797	1.54432	7188	-0.0293858	0.00459458
7237	0.163774	0.00752989	7237	0.132321	0.0234732	7237	-7.26316	1.5407	7187	-0.0293593	0.00459668
7236	0.163968	0.00753008	7236	0.132574	0.0234784	7236	-7.24848	1.53708	7186	-0.0293334	0.00459891
7235	0.164162	0.0075302	7235	0.132827	0.0234835	7235	-7.23394	1.53345	7185	-0.0293082	0.00460126
7234	0.164355	0.00753025	7234	0.133078	0.0234885	7234	-7.21954	1.52983	7184	-0.0292835	0.00460373
7233	0.164548	0.00753023	7233	0.133328	0.0234933	7233	-7.20527	1.52622	7183	-0.0292594	0.00460633
7232	0.164741	0.00753013	7232	0.133578	0.0234981	7232	-7.19114	1.5226	7182	-0.0292359	0.00460906
7231	0.164933	0.00752995	7231	0.133826	0.0235028	7231	-7.17715	1.51899	7181	-0.029213	0.00461192
7230	0.165124	0.0075297	7230	0.134073	0.0235073	7230	-7.1633	1.51539	7180	-0.0291907	0.00461491
7229	0.165315	0.00752935	7229	0.134319	0.0235117	7229	-7.14958	1.5118	7179	-0.029169	0.00461804
7228	0.165506	0.00752892	7228	0.134564	0.023516	7228	-7.136	1.50821	7178	-0.0291478	0.00462131
7227	0.165696	0.00752839	7227	0.134807	0.0235201	7227	-7.12257	1.50464	7177	-0.0291272	0.00462473
7226	0.165885	0.00752776	7226	0.13505	0.0235241	7226	-7.10927	1.50107	7176	-0.0291073	0.00462828
7225	0.166074	0.00752703	7225	0.135291	0.0235279	7225	-7.09611	1.49751	7175	-0.0290879	0.00463198
7224	0.166263	0.0075262	7224	0.135531	0.0235316	7224	-7.0831	1.49397	7174	-0.0290691	0.00463583
7223	0.16645	0.00752526	7223	0.13577	0.0235352	7223	-7.07023	1.49044	7173	-0.0290508	0.00463983
7222	0.166638	0.00752421	7222	0.136008	0.0235386	7222	-7.0575	1.48693	7172	-0.0290332	0.00464397
7221	0.166824	0.00752305	7221	0.136244	0.0235419	7221	-7.04491	1.48343	7171	-0.0290161	0.00464827
7220	0.16701	0.00752178	7220	0.136479	0.023545	7220	-7.03246	1.47994	7170	-0.0289996	0.00465273
7219	0.167196	0.00752041	7219	0.136713	0.023548	7219	-7.02016	1.47648	7169	-0.0289836	0.00465734
7218	0.16738	0.00751894	7218	0.136945	0.0235508	7218	-7.00798	1.47303	7168	-0.0289682	0.00466211
7217	0.167564	0.00751737	7217	0.137176	0.0235536	7217	-6.99595	1.46961	7167	-0.0289534	0.00466704
7216	0.167748	0.0075157	7216	0.137406	0.0235562	7216	-6.98405	1.4662	7166	-0.0289392	0.00467213
7215	0.167931	0.00751394	7215	0.137635	0.0235587	7215	-6.97229	1.46282	7165	-0.0289255	0.00467738
7214	0.168113	0.00751208	7214	0.137862	0.0235612	7214	-6.96066	1.45946	7164	-0.0289124	0.0046828
7213	0.168295	0.00751015	7213	0.138088	0.0235635	7213	-6.94916	1.45612	7163	-0.0288999	0.00468839
7212	0.168476	0.00750812	7212	0.138313	0.0235657	7212	-6.93779	1.45281	7162	-0.0288879	0.00469414
7211	0.168657	0.00750601	7211	0.138536	0.0235679	7211	-6.92655	1.44953	7161	-0.0288764	0.00470006
7210	0.168837	0.00750383	7210	0.138759	0.02357	7210	-6.91544	1.44627	7160	-0.0288655	0.00470615
7209	0.169016	0.00750156	7209	0.13898	0.023572	7209	-6.90446	1.44304	7159	-0.0288552	0.00471241
7208	0.169195	0.00749923	7208	0.139199	0.023574	7208	-6.8936	1.43984	7158	-0.0288454	0.00471884
7207	0.169373	0.00749683	7207	0.139418	0.0235759	7207	-6.88287	1.43668	7157	-0.0288361	0.00472545
7206	0.16955	0.00749435	7206	0.139635	0.0235778	7206	-6.87226	1.43354	7156	-0.0288273	0.00473223
7205	0.169727	0.00749182	7205	0.13985	0.0235796	7205	-6.86178	1.43044	7155	-0.028819	0.00473918
7204	0.169903	0.00748922	7204	0.140065	0.0235814	7204	-6.85141	1.42738	7154	-0.0288112	0.00474631
7203	0.170079	0.00748657	7203	0.140278	0.0235832	7203	-6.84117	1.42435	7153	-0.0288039	0.00475362
7202	0.170254	0.00748386	7202	0.14049	0.0235849	7202	-6.83104	1.42136	7152	-0.0287971	0.0047611
7201	0.170428	0.0074811	7201	0.140701	0.0235866	7201	-6.82104	1.41841	7151	-0.0287908	0.00476876
7200	0.170602	0.00747829	7200	0.14091	0.0235883	7200	-6.81114	1.41549	7150	-0.0287849	0.0047766
7199	0.170775	0.00747544	7199	0.141118	0.02359	7199	-6.80137	1.41262	7149	-0.0287794	0.00478462
7198	0.170948	0.00747254	7198	0.141325	0.0235917	7198	-6.7917	1.40979	7148	-0.0287744	0.00479281
7197	0.171119	0.00746961	7197	0.141531	0.0235934	7197	-6.78215	1.407	7147	-0.0287698	0.00480118
7196	0.171291	0.00746664	7196	0.141735	0.0235951	7196	-6.77272	1.40426	7146	-0.0287657	0.00480973
7195	0.171461	0.00746364	7195	0.141938	0.0235967	7195	-6.76339	1.40156	7145	-0.0287619	0.00481846
7194	0.171631	0.00746061	7194	0.14214	0.0235984	7194	-6.75417	1.39891	7144	-0.0287586	0.00482736
7193	0.1718	0.00745755	7193	0.14234	0.0236001	7193	-6.74506	1.39631	7143	-0.0287557	0.00483645
7192	0.171969	0.00745447	7192	0.142539	0.0236018	7192	-6.73606	1.39376	7142	-0.0287531	0.0048457
7191	0.172137	0.00745137	7191	0.142737	0.0236036	7191	-6.72716	1.39126	7141	-0.0287509	0.00485514
7190	0.172304	0.00744825	7190	0.142934	0.0236053	7190	-6.71836	1.38881	7140	-0.0287491	0.00486475
7189	0.172471	0.00744512	7189	0.143129	0.0236071	7189	-6.70967	1.38641	7139	-0.0287476	0.00487454
7188	0.172637	0.00744198	7188	0.143323	0.0236089	7188	-6.70109	1.38407	7138	-0.0287465	0.0048845
7187	0.172803	0.00743883	7187	0.143516	0.0236107	7187	-6.6926	1.38178	7137	-0.0287457	0.00489463
7186	0.172967	0.00743567	7186	0.143707	0.0236126	7186	-6.68421	1.37955	7136	-0.0287453	0.00490494
7185	0.173131	0.00743252	7185	0.143898	0.0236145	7185	-6.67592	1.37737	7135	-0.0287452	0.00491541
7184	0.173295	0.00742937	7184	0.144086	0.0236164	7184	-6.66773	1.37525	7134	-0.0287454	0.00492606
7183	0.173458	0.00742621	7183	0.144274	0.0236183	7183	-6.65963	1.3732	7133	-0.0287458	0.00493687
7182	0.17362	0.00742307	7182	0.14446	0.0236203	7182	-6.65163	1.3712	7132	-0.0287466	0.00494786
7181	0.173781	0.00741994	7181	0.144646	0.0236223	7181	-6.64373	1.36926	7131	-0.0287477	0.004959
7180	0.173942	0.00741682	7180	0.144829	0.0236243	7180	-6.63591	1.36739	7130	-0.028749	0.00497031
7179	0.174102	0.00741372	7179	0.145012	0.0236264	7179	-6.62819	1.36558	7129	-0.0287507	0.00498179
7178	0.174262	0.00741064	7178	0.145193	0.0236284	7178	-6.62055	1.36383	7128	-0.0287525	0.00499342
7177	0.174421	0.00740758	7177	0.145373	0.0236306	7177	-6.61301	1.36215	7127	-0.0287546	0.00500521
7176	0.174579	0.00740455	7176	0.145552	0.0236327	7176	-6.60555	1.36054	7126	-0.028757	0.00501716
7175	0.174736	0.00740154	7175	0.145729	0.0236349	7175	-6.59818	1.35899	7125	-0.0287596	0.00502927
7174	0.174893	0.00739857	7174	0.145906	0.0236371	7174	-6.5909	1.35751	7124	-0.0287624	0.00504152
7173	0.175049	0.00739563	7173	0.14608	0.0236393	7173	-6.58369	1.3561	7123	-0.0287654	0.00505392
7172	0.175205	0.00739272	7172	0.146254	0.0236416	7172	-6.57658	1.35476	7122	-0.0287686	0.00506648
7171	0.17536	0.00738986	7171	0.146426	0.0236438	7171	-6.56954	1.35349	7121	-0.028772	0.00507917
7170	0.175514	0.00738704	7170	0.146598	0.0236461	7170	-6.56258	1.35229	7120	-0.0287756	0.00509201
7169	0.175667	0.00738427	7169	0.146767	0.0236484	7169	-6.55571	1.35116	7119	-0.0287794	0.00510499
7168	0.17582	0.00738154	7168	0.146936	0.0236507	7168	-6.54891	1.35011	7118	-0.0287833	0.0051181
7167	0.175972	0.00737887	7167	0.147103	0.0236531	7167	-6.54219	1.34913	7117	-0.0287874	0.00513133
7166	0.176124	0.00737625	7166	0.147269	0.0236554	7166	-6.53554	1.34823	7116	-0.0287917	0.00514468
7165	0.176274	0.00737369	7165	0.147434	0.0236578	7165	-6.52897	1.3474	7115	-0.0287961	0.00515814
7164	0.176424	0.00737119	7164	0.147597	0.0236601	7164	-6.52247	1.34664	7114	-0.0288007	0.00517171
7163	0.176574	0.00736876	7163	0.147759	0.0236625	7163	-6.51605	1.34596	7113	-0.0288053	0.00518538
7162	0.176722	0.00736639	7162	0.14792	0.0236648	7162	-6.50969	1.34536	7112	-0.0288101	0.00519914
7161	0.17687	0.0073641	7161	0.14808	0.0236672	7161	-6.50341	1.34483	7111	-0.028815	0.00521299
7160	0.177018	0.00736188	7160	0.148238	0.0236695	7160	-6.49719	1.34439	7110	-0.0288201	0.00522692
7159	0.177164	0.00735974	7159	0.148395	0.0236719	7159	-6.49104	1.34402	7109	-0.0288252	0.00524092
7158	0.17731	0.0073577	7158	0.148551	0.0236742	7158	-6.48496	1.34373	7108	-0.0288304	0.00525499
7157	0.177456	0.00735575	7157	0.148706	0.0236766	7157	-6.47894	1.34351	7107	-0.0288357	0.00526912
7156	0.1776	0.0073539	7156	0.148859	0.023679	7156	-6.47298	1.34337	7106	-0.0288411	0.00528331
7155	0.177744	0.00735216	7155	0.149011	0.0236814	7155	-6.46709	1.34331	7105	-0.0288465	0.00529754
7154	0.177887	0.00735053	7154	0.149162	0.0236838	7154	-6.46126	1.34333	7104	-0.0288521	0.00531181
7153	0.17803	0.00734903	7153	0.149312	0.0236863	7153	-6.45548	1.34342	7103	-0.0288576	0.00532612
7152	0.178172	0.00734766	7152	0.149461	0.0236887	7152	-6.44977	1.3436	7102	-0.0288632	0.00534045
7151	0.178313	0.00734642	7151	0.149609	0.0236912	7151	-6.44411	1.34384	7101	-0.0288689	0.0053548
7150	0.178454	0.00734532	7150	0.149755	0.0236938	7150	-6.43851	1.34417	7100	-0.0288746	0.00536916
7149	0.178594	0.00734436	7149	0.1499	0.0236964	7149	-6.43296	1.34457	7099	-0.0288803	0.00538353
7148	0.178734	0.00734356	7148	0.150045	0.023699	7148	-6.42747	1.34505	7098	-0.0288861	0.0053979
7147	0.178873	0.00734292	7147	0.150188	0.0237016	7147	-6.42203	1.3456	7097	-0.0288918	0.00541226
7146	0.179011	0.00734244	7146	0.15033	0.0237043	7146	-6.41664	1.34623	7096	-0.0288976	0.0054266
7145	0.179148	0.00734214	7145	0.150471	0.0237071	7145	-6.4113	1.34693	7095	-0.0289033	0.00544092
7144	0.179285	0.00734201	7144	0.150611	0.0237099	7144	-6.40601	1.34771	7094	-0.028909	0.00545521
7143	0.179422	0.00734207	7143	0.15075	0.0237127	7143	-6.40076	1.34856	7093	-0.0289147	0.00546946
7142	0.179557	0.00734232	7142	0.150888	0.0237156	7142	-6.39556	1.34949	7092	-0.0289204	0.00548367
7141	0.179692	0.00734276	7141	0.151025	0.0237186	7141	-6.39041	1.35049	7091	-0.0289261	0.00549782
7140	0.179827	0.0073434	7140	0.151161	0.0237216	7140	-6.3853	1.35156	7090	-0.0289317	0.00551192
7139	0.179961	0.00734425	7139	0.151296	0.0237246	7139	-6.38023	1.35271	7089	-0.0289372	0.00552595
7138	0.180094	0.00734531	7138	0.15143	0.0237277	7138	-6.3752	1.35393	7088	-0.0289427	0.00553991
7137	0.180227	0.00734659	7137	0.151563	0.0237309	7137	-6.37021	1.35522	7087	-0.0289482	0.00555379
7136	0.180359	0.00734809	7136	0.151696	0.0237341	7136	-6.36526	1.35658	7086	-0.0289535	0.00556758
7135	0.180491	0.00734983	7135	0.151827	0.0237374	7135	-6.36035	1.35801	7085	-0.0289588	0.00558127
7134	0.180622	0.00735179	7134	0.151957	0.0237407	7134	-6.35547	1.35951	7084	-0.028964	0.00559487
7133	0.180753	0.007354	7133	0.152087	0.0237441	7133	-6.35063	1.36108	7083	-0.0289691	0.00560835
7132	0.180882	0.00735645	7132	0.152216	0.0237476	7132	-6.34582	1.36272	7082	-0.0289741	0.00562172
7131	0.181012	0.00735915	7131	0.152343	0.0237511	7131	-6.34105	1.36442	7081	-0.028979	0.00563496
7130	0.181141	0.0073621	7130	0.15247	0.0237546	7130	-6.3363	1.3662	7080	-0.0289838	0.00564807
7129	0.181269	0.00736531	7129	0.152596	0.0237582	7129	-6.33158	1.36804	7079	-0.0289884	0.00566105
7128	0.181397	0.00736879	7128	0.152722	0.0237619	7128	-6.32689	1.36995	7078	-0.0289929	0.00567388
7127	0.181524	0.00737254	7127	0.152846	0.0237656	7127	-6.32223	1.37192	7077	-0.0289973	0.00568655
7126	0.181651	0.00737656	7126	0.15297	0.0237694	7126	-6.3176	1.37396	7076	-0.0290015	0.00569907
7125	0.181777	0.00738085	7125	0.153093	0.0237732	7125	-6.31299	1.37606	7075	-0.0290055	0.00571142
7124	0.181902	0.00738543	7124	0.153215	0.0237771	7124	-6.3084	1.37822	7074	-0.0290094	0.0057236
7123	0.182027	0.00739029	7123	0.153336	0.023781	7123	-6.30383	1.38045	7073	-0.0290132	0.0057356
7122	0.182152	0.00739545	7122	0.153457	0.0237849	7122	-6.29929	1.38273	7072	-0.0290167	0.00574741
7121	0.182276	0.0074009	7121	0.153577	0.0237889	7121	-6.29476	1.38508	7071	-0.0290201	0.00575903
7120	0.182399	0.00740664	7120	0.153696	0.023793	7120	-6.29025	1.38749	7070	-0.0290233	0.00577045
7119	0.182523	0.00741269	7119	0.153814	0.023797	7119	-6.28577	1.38996	7069	-0.0290262	0.00578166
7118	0.182645	0.00741904	7118	0.153932	0.0238012	7118	-6.2813	1.39249	7068	-0.029029	0.00579266
7117	0.182767	0.00742569	7117	0.154049	0.0238054	7117	-6.27685	1.39507	7067	-0.0290315	0.00580343
7116	0.182889	0.00743265	7116	0.154166	0.0238096	7116	-6.27242	1.39771	7066	-0.0290338	0.00581398
7115	0.18301	0.00743993	7115	0.154282	0.0238139	7115	-6.26801	1.40041	7065	-0.0290359	0.00582429
7114	0.18313	0.00744751	7114	0.154397	0.0238182	7114	-6.26363	1.40316	7064	-0.0290377	0.00583436
7113	0.18325	0.00745541	7113	0.154512	0.0238227	7113	-6.25926	1.40597	7063	-0.0290393	0.00584419
7112	0.18337	0.00746362	7112	0.154626	0.0238271	7112	-6.25492	1.40883	7062	-0.0290405	0.00585375
7111	0.183489	0.00747216	7111	0.154739	0.0238317	7111	-6.2506	1.41174	7061	-0.0290414	0.00586306
7110	0.183608	0.00748101	7110	0.154852	0.0238363	7110	-6.24631	1.41471	7060	-0.029042	0.0058721
7109	0.183726	0.00749018	7109	0.154964	0.023841	7109	-6.24204	1.41772	7059	-0.0290422	0.00588087
7108	0.183844	0.00749967	7108	0.155076	0.0238457	7108	-6.23779	1.42078	7058	-0.0290421	0.00588935
7107	0.183961	0.00750948	7107	0.155187	0.0238505	7107	-6.23357	1.42389	7057	-0.0290416	0.00589755
7106	0.184078	0.00751962	7106	0.155298	0.0238554	7106	-6.22937	1.42705	7056	-0.0290406	0.00590545
7105	0.184195	0.00753008	7105	0.155408	0.0238604	7105	-6.2252	1.43026	7055	-0.0290393	0.00591305
7104	0.184311	0.00754087	7104	0.155517	0.0238654	7104	-6.22106	1.43351	7054	-0.0290375	0.00592034
7103	0.184426	0.00755197	7103	0.155626	0.0238705	7103	-6.21695	1.4368	7053	-0.0290352	0.00592731
7102	0.184542	0.00756341	7102	0.155735	0.0238757	7102	-6.21286	1.44014	7052	-0.0290324	0.00593397
7101	0.184656	0.00757517	7101	0.155843	0.023881	7101	-6.2088	1.44352	7051	-0.0290292	0.00594029
7100	0.184771	0.00758725	7100	0.155951	0.0238863	7100	-6.20477	1.44695	7050	-0.0290254	0.00594628
7099	0.184885	0.00759965	7099	0.156058	0.0238917	7099	-6.20077	1.45041	7049	-0.0290211	0.00595193
7098	0.184998	0.00761237	7098	0.156165	0.0238972	7098	-6.1968	1.45391	7048	-0.0290162	0.00595723
7097	0.185112	0.00762542	7097	0.156271	0.0239027	7097	-6.19286	1.45745	7047	-0.0290108	0.00596217
7096	0.185224	0.00763879	7096	0.156377	0.0239083	7096	-6.18895	1.46103	7046	-0.0290048	0.00596675
7095	0.185337	0.00765248	7095	0.156483	0.023914	7095	-6.18508	1.46465	7045	-0.0289981	0.00597096
7094	0.185449	0.00766648	7094	0.156588	0.0239197	7094	-6.18123	1.4683	7044	-0.0289909	0.0059748
7093	0.18556	0.0076808	7093	0.156693	0.0239255	7093	-6.17742	1.47198	7043	-0.028983	0.00597825
7092	0.185672	0.00769544	7092	0.156797	0.0239313	7092	-6.17364	1.4757	7042	-0.0289744	0.00598131
7091	0.185782	0.00771039	7091	0.156902	0.0239372	7091	-6.1699	1.47945	7041	-0.0289651	0.00598398
7090	0.185893	0.00772565	7090	0.157005	0.0239431	7090	-6.16619	1.48323	7040	-0.0289551	0.00598625
7089	0.186003	0.00774122	7089	0.157109	0.0239491	7089	-6.16251	1.48704	7039	-0.0289444	0.0059881
7088	0.186113	0.00775709	7088	0.157212	0.0239551	7088	-6.15887	1.49088	7038	-0.028933	0.00598954
7087	0.186222	0.00777327	7087	0.157315	0.0239611	7087	-6.15527	1.49474	7037	-0.0289208	0.00599056
7086	0.186332	0.00778975	7086	0.157418	0.0239672	7086	-6.1517	1.49864	7036	-0.0289079	0.00599115
7085	0.18644	0.00780653	7085	0.15752	0.0239733	7085	-6.14817	1.50256	7035	-0.0288941	0.00599131
7084	0.186549	0.0078236	7084	0.157622	0.0239794	7084	-6.14467	1.5065	7034	-0.0288796	0.00599103
7083	0.186657	0.00784097	7083	0.157724	0.0239856	7083	-6.14122	1.51047	7033	-0.0288642	0.00599034
7082	0.186765	0.00785862	7082	0.157826	0.0239917	7082	-6.1378	1.51446	7032	-0.0288481	0.00598923
7081	0.186872	0.00787656	7081	0.157927	0.0239979	7081	-6.13442	1.51847	7031	-0.0288312	0.00598771
7080	0.186979	0.00789478	7080	0.158028	0.024004	7080	-6.13109	1.52251	7030	-0.0288135	0.00598579
7079	0.187086	0.00791328	7079	0.158129	0.0240101	7079	-6.12779	1.52656	7029	-0.0287951	0.00598348
7078	0.187193	0.00793205	7078	0.15823	0.0240162	7078	-6.12453	1.53063	7028	-0.0287758	0.00598078
7077	0.187299	0.0079511	7077	0.158331	0.0240223	7077	-6.12131	1.53472	7027	-0.0287558	0.0059777
7076	0.187405	0.00797041	7076	0.158431	0.0240284	7076	-6.11814	1.53883	7026	-0.0287351	0.00597424
7075	0.18751	0.00798998	7075	0.158532	0.0240344	7075	-6.11501	1.54295	7025	-0.0287135	0.00597042
7074	0.187616	0.00800981	7074	0.158632	0.0240403	7074	-6.11192	1.54709	7024	-0.0286912	0.00596624
7073	0.187721	0.0080299	7073	0.158732	0.0240463	7073	-6.10887	1.55124	7023	-0.0286682	0.0059617
7072	0.187825	0.00805023	7072	0.158832	0.0240521	7072	-6.10587	1.55541	7022	-0.0286444	0.00595682
7071	0.18793	0.00807081	7071	0.158932	0.0240579	7071	-6.10292	1.55959	7021	-0.0286198	0.0059516
7070	0.188034	0.00809163	7070	0.159032	0.0240636	7070	-6.1	1.56378	7020	-0.0285945	0.00594605
7069	0.188138	0.00811269	7069	0.159132	0.0240692	7069	-6.09714	1.56798	7019	-0.0285684	0.00594018
7068	0.188242	0.00813397	7068	0.159231	0.0240747	7068	-6.09432	1.57219	7018	-0.0285416	0.00593399
7067	0.188345	0.00815549	7067	0.159331	0.0240801	7067	-6.09154	1.57641	7017	-0.028514	0.0059275
7066	0.188449	0.00817722	7066	0.159431	0.0240854	7066	-6.08881	1.58063	7016	-0.0284857	0.0059207
7065	0.188551	0.00819916	7065	0.15953	0.0240906	7065	-6.08613	1.58487	7015	-0.0284567	0.0059136
7064	0.188654	0.00822131	7064	0.15963	0.0240957	7064	-6.08349	1.58911	7014	-0.0284269	0.00590622
7063	0.188757	0.00824365	7063	0.15973	0.0241006	7063	-6.08089	1.59336	7013	-0.0283965	0.00589856
7062	0.188859	0.00826617	7062	0.159829	0.0241054	7062	-6.07832	1.59762	7012	-0.0283652	0.00589063
7061	0.188961	0.00828887	7061	0.159929	0.02411	7061	-6.07579	1.60189	7011	-0.0283333	0.00588243
7060	0.189063	0.00831173	7060	0.160029	0.0241145	7060	-6.07329	1.60616	7010	-0.0283006	0.00587397
7059	0.189164	0.00833475	7059	0.160129	0.0241189	7059	-6.07081	1.61044	7009	-0.0282673	0.00586525
7058	0.189265	0.00835791	7058	0.160229	0.0241231	7058	-6.06836	1.61473	7008	-0.0282332	0.00585629
7057	0.189366	0.00838121	7057	0.16033	0.0241271	7057	-6.06594	1.61903	7007	-0.0281985	0.00584708
7056	0.189467	0.00840464	7056	0.16043	0.024131	7056	-6.06353	1.62333	7006	-0.028163	0.00583764
7055	0.189568	0.00842818	7055	0.160531	0.0241347	7055	-6.06114	1.62764	7005	-0.0281269	0.00582796
7054	0.189668	0.00845183	7054	0.160631	0.0241382	7054	-6.05876	1.63195	7004	-0.0280902	0.00581806
7053	0.189768	0.00847557	7053	0.160732	0.0241416	7053	-6.0564	1.63628	7003	-0.0280528	0.00580793
7052	0.189868	0.0084994	7052	0.160834	0.0241447	7052	-6.05404	1.64061	7002	-0.0280148	0.00579759
7051	0.189967	0.00852331	7051	0.160935	0.0241476	7051	-6.05169	1.64494	7001	-0.0279761	0.00578704
7050	0.190066	0.00854729	7050	0.161037	0.0241503	7050	-6.04935	1.64928	7000	-0.0279368	0.00577628
7049	0.190165	0.00857132	7049	0.161139	0.0241528	7049	-6.047	1.65363	6999	-0.0278969	0.00576533
7048	0.190264	0.0085954	7048	0.161242	0.0241551	7048	-6.04465	1.65798	6998	-0.0278564	0.00575418
7047	0.190363	0.00861951	7047	0.161344	0.0241572	7047	-6.0423	1.66234	6997	-0.0278153	0.00574284
7046	0.190461	0.00864366	7046	0.161448	0.024159	7046	-6.03994	1.66671	6996	-0.0277736	0.00573132
7045	0.190559	0.00866782	7045	0.161551	0.0241606	7045	-6.03757	1.67107	6995	-0.0277314	0.00571962
7044	0.190657	0.00869199	7044	0.161655	0.0241619	7044	-6.03518	1.67545	6994	-0.0276886	0.00570775
7043	0.190755	0.00871616	7043	0.161759	0.0241629	7043	-6.03278	1.67983	6993	-0.0276452	0.00569571
7042	0.190852	0.00874031	7042	0.161864	0.0241637	7042	-6.03036	1.68421	6992	-0.0276013	0.00568351
7041	0.190949	0.00876444	7041	0.161969	0.0241642	7041	-6.02792	1.6886	6991	-0.0275569	0.00567116
7040	0.191046	0.00878855	7040	0.162075	0.0241645	7040	-6.02545	1.69299	6990	-0.0275119	0.00565865
7039	0.191143	0.00881261	7039	0.162181	0.0241644	7039	-6.02296	1.69738	6989	-0.0274664	0.005646
7038	0.191239	0.00883662	7038	0.162287	0.024164	7038	-6.02044	1.70178	6988	-0.0274204	0.00563321
7037	0.191335	0.00886057	7037	0.162394	0.0241634	7037	-6.01788	1.70619	6987	-0.027374	0.00562029
7036	0.191431	0.00888445	7036	0.162502	0.0241624	7036	-6.01529	1.71059	6986	-0.027327	0.00560723
7035	0.191527	0.00890825	7035	0.16261	0.0241611	7035	-6.01266	1.715	6985	-0.0272795	0.00559406
7034	0.191623	0.00893196	7034	0.162719	0.0241595	7034	-6.01	1.71941	6984	-0.0272316	0.00558076
7033	0.191718	0.00895558	7033	0.162828	0.0241575	7033	-6.00729	1.72382	6983	-0.0271832	0.00556735
7032	0.191813	0.00897908	7032	0.162938	0.0241553	7032	-6.00455	1.72824	6982	-0.0271344	0.00555384
7031	0.191907	0.00900246	7031	0.163049	0.0241527	7031	-6.00177	1.73266	6981	-0.0270852	0.00554022
7030	0.192002	0.00902572	7030	0.163159	0.0241499	7030	-5.99896	1.73708	6980	-0.0270355	0.0055265
7029	0.192096	0.00904883	7029	0.163271	0.0241467	7029	-5.99611	1.7415	6979	-0.0269853	0.00551269
7028	0.19219	0.0090718	7028	0.163383	0.0241433	7028	-5.99322	1.74593	6978	-0.0269348	0.00549879
7027	0.192283	0.0090946	7027	0.163495	0.0241396	7027	-5.99029	1.75035	6977	-0.0268839	0.00548481
7026	0.192376	0.00911723	7026	0.163607	0.0241356	7026	-5.98733	1.75478	6976	-0.0268326	0.00547075
7025	0.192469	0.00913968	7025	0.16372	0.0241313	7025	-5.98433	1.75921	6975	-0.0267809	0.00545662
7024	0.192561	0.00916194	7024	0.163834	0.0241267	7024	-5.9813	1.76364	6974	-0.0267288	0.00544242
7023	0.192654	0.00918401	7023	0.163948	0.0241219	7023	-5.97823	1.76807	6973	-0.0266763	0.00542815
7022	0.192745	0.00920586	7022	0.164062	0.0241168	7022	-5.97512	1.7725	6972	-0.0266236	0.00541383
7021	0.192836	0.00922749	7021	0.164177	0.0241114	7021	-5.97198	1.77693	6971	-0.0265704	0.00539945
7020	0.192927	0.00924889	7020	0.164292	0.0241058	7020	-5.96881	1.78136	6970	-0.0265169	0.00538502
7019	0.193018	0.00927005	7019	0.164407	0.0241	7019	-5.9656	1.78579	6969	-0.0264631	0.00537055
7018	0.193108	0.00929096	7018	0.164523	0.0240939	7018	-5.96235	1.79022	6968	-0.026409	0.00535604
7017	0.193198	0.00931162	7017	0.164639	0.0240875	7017	-5.95907	1.79464	6967	-0.0263546	0.00534149
7016	0.193287	0.009332	7016	0.164755	0.0240809	7016	-5.95576	1.79907	6966	-0.0262999	0.00532691
7015	0.193375	0.00935211	7015	0.164871	0.0240741	7015	-5.95241	1.80349	6965	-0.0262449	0.0053123
7014	0.193464	0.00937192	7014	0.164988	0.024067	7014	-5.94902	1.80791	6964	-0.0261896	0.00529766
7013	0.193552	0.00939145	7013	0.165105	0.0240597	7013	-5.94561	1.81232	6963	-0.026134	0.00528301
7012	0.193639	0.00941066	7012	0.165223	0.0240522	7012	-5.94216	1.81674	6962	-0.0260782	0.00526834
7011	0.193726	0.00942957	7011	0.16534	0.0240445	7011	-5.93867	1.82114	6961	-0.0260221	0.00525366
7010	0.193812	0.00944815	7010	0.165458	0.0240366	7010	-5.93516	1.82554	6960	-0.0259658	0.00523898
7009	0.193898	0.00946643	7009	0.165576	0.0240284	7009	-5.93161	1.82994	6959	-0.0259093	0.00522429
7008	0.193983	0.00948439	7008	0.165694	0.0240201	7008	-5.92804	1.83432	6958	-0.0258525	0.0052096
7007	0.194068	0.00950205	7007	0.165812	0.0240116	7007	-5.92445	1.8387	6957	-0.0257956	0.00519491
7006	0.194153	0.00951939	7006	0.165931	0.0240029	7006	-5.92084	1.84307	6956	-0.0257384	0.00518023
7005	0.194237	0.00953643	7005	0.16605	0.023994	7005	-5.91721	1.84743	6955	-0.025681	0.00516556
7004	0.19432	0.00955316	7004	0.166169	0.023985	7004	-5.91356	1.85178	6954	-0.0256235	0.00515091
7003	0.194403	0.00956959	7003	0.166289	0.0239759	7003	-5.9099	1.85611	6953	-0.0255658	0.00513628
7002	0.194486	0.00958571	7002	0.166408	0.0239666	7002	-5.90622	1.86043	6952	-0.0255079	0.00512166
7001	0.194569	0.00960152	7001	0.166528	0.0239571	7001	-5.90254	1.86473	6951	-0.0254498	0.00510707
7000	0.194651	0.00961704	7000	0.166648	0.0239476	7000	-5.89886	1.86902	6950	-0.0253917	0.00509251
6999	0.194732	0.00963225	6999	0.166769	0.0239379	6999	-5.89517	1.87329	6949	-0.0253333	0.00507798
6998	0.194814	0.00964716	6998	0.166889	0.0239281	6998	-5.89148	1.87754	6948	-0.0252749	0.00506348
6997	0.194895	0.00966177	6997	0.16701	0.0239183	6997	-5.88779	1.88178	6947	-0.0252163	0.00504902
6996	0.194975	0.00967608	6996	0.167131	0.0239083	6996	-5.8841	1.88598	6946	-0.0251576	0.0050346
6995	0.195056	0.00969009	6995	0.167252	0.0238983	6995	-5.88042	1.89017	6945	-0.0250989	0.00502022
6994	0.195136	0.0097038	6994	0.167374	0.0238882	6994	-5.87676	1.89433	6944	-0.02504	0.00500588
6993	0.195215	0.00971721	6993	0.167496	0.023878	6993	-5.8731	1.89847	6943	-0.0249811	0.00499159
6992	0.195295	0.00973032	6992	0.167618	0.0238678	6992	-5.86946	1.90258	6942	-0.0249221	0.00497736
6991	0.195374	0.00974314	6991	0.16774	0.0238575	6991	-5.86583	1.90666	6941	-0.024863	0.00496317
6990	0.195453	0.00975566	6990	0.167863	0.0238472	6990	-5.86222	1.91071	6940	-0.0248038	0.00494903
6989	0.195531	0.00976787	6989	0.167986	0.0238368	6989	-5.85864	1.91473	6939	-0.0247446	0.00493494
6988	0.19561	0.00977979	6988	0.168109	0.0238264	6988	-5.85508	1.91871	6938	-0.0246853	0.0049209
6987	0.195688	0.00979141	6987	0.168232	0.023816	6987	-5.85154	1.92266	6937	-0.0246259	0.00490692
6986	0.195765	0.00980274	6986	0.168356	0.0238056	6986	-5.84804	1.92657	6936	-0.0245665	0.004893
6985	0.195843	0.00981376	6985	0.16848	0.0237952	6985	-5.84456	1.93044	6935	-0.024507	0.00487913
6984	0.195921	0.00982448	6984	0.168604	0.0237847	6984	-5.84113	1.93428	6934	-0.0244475	0.00486532
6983	0.195998	0.0098349	6983	0.168729	0.0237743	6983	-5.83772	1.93807	6933	-0.0243879	0.00485156
6982	0.196075	0.00984502	6982	0.168853	0.0237638	6982	-5.83436	1.94181	6932	-0.0243282	0.00483786
6981	0.196152	0.00985484	6981	0.168978	0.0237534	6981	-5.83104	1.94552	6931	-0.0242685	0.00482423
6980	0.196229	0.00986435	6980	0.169103	0.023743	6980	-5.82777	1.94917	6930	-0.0242088	0.00481065
6979	0.196305	0.00987356	6979	0.169229	0.0237326	6979	-5.82454	1.95277	6929	-0.024149	0.00479713
6978	0.196382	0.00988246	6978	0.169355	0.0237222	6978	-5.82136	1.95633	6928	-0.0240891	0.00478367
6977	0.196458	0.00989106	6977	0.169481	0.0237118	6977	-5.81823	1.95983	6927	-0.0240293	0.00477027
6976	0.196534	0.00989934	6976	0.169607	0.0237015	6976	-5.81516	1.96327	6926	-0.0239694	0.00475693
6975	0.19661	0.00990732	6975	0.169734	0.0236912	6975	-5.81214	1.96666	6925	-0.0239094	0.00474366
6974	0.196686	0.00991498	6974	0.169861	0.023681	6974	-5.80918	1.96999	6924	-0.0238494	0.00473044
6973	0.196762	0.00992233	6973	0.169988	0.0236708	6973	-5.80629	1.97326	6923	-0.0237894	0.00471729
6972	0.196838	0.00992936	6972	0.170115	0.0236606	6972	-5.80346	1.97647	6922	-0.0237294	0.0047042
6971	0.196914	0.00993607	6971	0.170243	0.0236505	6971	-5.80069	1.97961	6921	-0.0236693	0.00469117
6970	0.19699	0.00994247	6970	0.170371	0.0236404	6970	-5.798	1.98268	6920	-0.0236093	0.0046782
6969	0.197065	0.00994854	6969	0.170499	0.0236303	6969	-5.79538	1.98569	6919	-0.0235492	0.00466529
6968	0.197141	0.00995428	6968	0.170628	0.0236204	6968	-5.79283	1.98862	6918	-0.023489	0.00465245
6967	0.197217	0.0099597	6967	0.170757	0.0236104	6967	-5.79036	1.99149	6917	-0.0234289	0.00463966
6966	0.197292	0.00996479	6966	0.170886	0.0236005	6966	-5.78797	1.99427	6916	-0.0233688	0.00462694
6965	0.197368	0.00996954	6965	0.171016	0.0235907	6965	-5.78566	1.99698	6915	-0.0233086	0.00461427
6964	0.197444	0.00997396	6964	0.171145	0.0235809	6964	-5.78344	1.99961	6914	-0.0232484	0.00460167
6963	0.197519	0.00997804	6963	0.171275	0.0235712	6963	-5.7813	2.00216	6913	-0.0231883	0.00458912
6962	0.197595	0.00998178	6962	0.171406	0.0235615	6962	-5.77926	2.00463	6912	-0.0231281	0.00457663
6961	0.197671	0.00998517	6961	0.171536	0.0235518	6961	-5.7773	2.00701	6911	-0.0230679	0.0045642
6960	0.197747	0.00998821	6960	0.171667	0.0235423	6960	-5.77544	2.0093	6910	-0.0230077	0.00455183
6959	0.197822	0.00999091	6959	0.171799	0.0235327	6959	-5.77368	2.01151	6909	-0.0229476	0.00453951
6958	0.197898	0.00999325	6958	0.17193	0.0235232	6958	-5.77201	2.01362	6908	-0.0228874	0.00452725
6957	0.197975	0.00999523	6957	0.172062	0.0235138	6957	-5.77045	2.01564	6907	-0.0228272	0.00451504
6956	0.198051	0.00999685	6956	0.172194	0.0235043	6956	-5.769	2.01756	6906	-0.0227671	0.00450289
6955	0.198127	0.0099981	6955	0.172327	0.023495	6955	-5.76765	2.01938	6905	-0.022707	0.00449079
6954	0.198203	0.00999899	6954	0.172459	0.0234856	6954	-5.76641	2.0211	6904	-0.0226469	0.00447874
6953	0.19828	0.0099995	6953	0.172592	0.0234764	6953	-5.76528	2.02272	6903	-0.0225868	0.00446674
6952	0.198357	0.00999964	6952	0.172726	0.0234671	6952	-5.76427	2.02424	6902	-0.0225267	0.00445478
6951	0.198433	0.0099994	6951	0.172859	0.0234579	6951	-5.76337	2.02565	6901	-0.0224666	0.00444288
6950	0.19851	0.00999877	6950	0.172993	0.0234487	6950	-5.7626	2.02695	6900	-0.0224066	0.00443102
6949	0.198588	0.00999776	6949	0.173128	0.0234395	6949	-5.76194	2.02814	6899	-0.0223466	0.00441921
6948	0.198665	0.00999635	6948	0.173262	0.0234303	6948	-5.76142	2.02921	6898	-0.0222867	0.00440744
6947	0.198742	0.00999455	6947	0.173397	0.0234212	6947	-5.76102	2.03017	6897	-0.0222268	0.00439571
6946	0.19882	0.00999235	6946	0.173533	0.0234121	6946	-5.76074	2.03101	6896	-0.0221669	0.00438404
6945	0.198898	0.00998974	6945	0.173668	0.0234029	6945	-5.76061	2.03173	6895	-0.0221072	0.0043724
6944	0.198976	0.00998673	6944	0.173804	0.0233938	6944	-5.7606	2.03234	6894	-0.0220475	0.00436081
6943	0.199055	0.0099833	6943	0.17394	0.0233847	6943	-5.76073	2.03281	6893	-0.0219879	0.00434927
6942	0.199134	0.00997947	6942	0.174077	0.0233756	6942	-5.761	2.03317	6892	-0.0219285	0.00433777
6941	0.199212	0.00997524	6941	0.174214	0.0233666	6941	-5.7614	2.0334	6891	-0.0218691	0.00432632
6940	0.199292	0.00997061	6940	0.174351	0.0233575	6940	-5.76192	2.03351	6890	-0.0218099	0.00431491
6939	0.199371	0.00996558	6939	0.174488	0.0233484	6939	-5.76257	2.0335	6889	-0.0217509	0.00430354
6938	0.19945	0.00996016	6938	0.174626	0.0233394	6938	-5.76334	2.03337	6888	-0.021692	0.00429223
6937	0.19953	0.00995436	6937	0.174763	0.0233304	6937	-5.76423	2.03312	6887	-0.0216333	0.00428095
6936	0.19961	0.00994817	6936	0.174902	0.0233214	6936	-5.76523	2.03275	6886	-0.0215748	0.00426972
6935	0.19969	0.00994161	6935	0.17504	0.0233125	6935	-5.76634	2.03226	6885	-0.0215164	0.00425854
6934	0.19977	0.00993467	6934	0.175178	0.0233035	6934	-5.76756	2.03166	6884	-0.0214583	0.0042474
6933	0.19985	0.00992736	6933	0.175317	0.0232947	6933	-5.76888	2.03094	6883	-0.0214004	0.0042363
6932	0.199931	0.00991969	6932	0.175456	0.0232858	6932	-5.7703	2.0301	6882	-0.0213427	0.00422524
6931	0.200011	0.00991166	6931	0.175595	0.023277	6931	-5.77182	2.02915	6881	-0.0212853	0.00421423
6930	0.200092	0.00990327	6930	0.175734	0.0232682	6930	-5.77344	2.02808	6880	-0.0212281	0.00420326
6929	0.200173	0.00989452	6929	0.175873	0.0232595	6929	-5.77514	2.0269	6879	-0.0211712	0.00419234
6928	0.200254	0.00988543	6928	0.176013	0.0232508	6928	-5.77693	2.02561	6878	-0.0211146	0.00418145
6927	0.200334	0.00987599	6927	0.176152	0.0232422	6927	-5.77881	2.0242	6877	-0.0210583	0.00417061
6926	0.200415	0.00986621	6926	0.176292	0.0232337	6926	-5.78076	2.02268	6876	-0.0210022	0.00415981
6925	0.200496	0.00985609	6925	0.176431	0.0232251	6925	-5.7828	2.02105	6875	-0.0209465	0.00414905
6924	0.200577	0.00984564	6924	0.176571	0.0232167	6924	-5.78491	2.01931	6874	-0.0208912	0.00413833
6923	0.200658	0.00983485	6923	0.176711	0.0232083	6923	-5.78708	2.01746	6873	-0.0208361	0.00412765
6922	0.200739	0.00982374	6922	0.176851	0.0231999	6922	-5.78933	2.01551	6872	-0.0207814	0.004117
6921	0.20082	0.00981231	6921	0.176991	0.0231916	6921	-5.79164	2.01344	6871	-0.0207271	0.0041064
6920	0.200902	0.00980056	6920	0.177131	0.0231834	6920	-5.794	2.01126	6870	-0.0206732	0.00409583
6919	0.200983	0.00978849	6919	0.17727	0.0231752	6919	-5.79643	2.00898	6869	-0.0206196	0.0040853
6918	0.201064	0.0097761	6918	0.17741	0.0231671	6918	-5.79891	2.00659	6868	-0.0205664	0.0040748
6917	0.201145	0.00976341	6917	0.17755	0.023159	6917	-5.80144	2.0041	6867	-0.0205137	0.00406433
6916	0.201226	0.00975041	6916	0.17769	0.023151	6916	-5.80402	2.00149	6866	-0.0204614	0.0040539
6915	0.201306	0.00973711	6915	0.17783	0.023143	6915	-5.80664	1.99879	6865	-0.0204095	0.00404351
6914	0.201387	0.00972351	6914	0.177969	0.0231351	6914	-5.8093	1.99598	6864	-0.020358	0.00403314
6913	0.201468	0.00970961	6913	0.178109	0.0231273	6913	-5.81199	1.99306	6863	-0.0203071	0.0040228
6912	0.201549	0.00969541	6912	0.178248	0.0231195	6912	-5.81473	1.99004	6862	-0.0202566	0.0040125
6911	0.201629	0.00968093	6911	0.178387	0.0231118	6911	-5.81749	1.98692	6861	-0.0202065	0.00400222
6910	0.201709	0.00966615	6910	0.178527	0.0231041	6910	-5.82028	1.9837	6860	-0.020157	0.00399196
6909	0.20179	0.00965109	6909	0.178666	0.0230965	6909	-5.82309	1.98037	6859	-0.020108	0.00398174
6908	0.20187	0.00963574	6908	0.178805	0.0230889	6908	-5.82592	1.97695	6858	-0.0200595	0.00397153
6907	0.20195	0.00962011	6907	0.178943	0.0230814	6907	-5.82877	1.97342	6857	-0.0200115	0.00396136
6906	0.20203	0.0096042	6906	0.179082	0.0230739	6906	-5.83163	1.96979	6856	-0.0199641	0.0039512
6905	0.202109	0.00958802	6905	0.17922	0.0230665	6905	-5.83451	1.96606	6855	-0.0199172	0.00394106
6904	0.202189	0.00957156	6904	0.179359	0.0230591	6904	-5.83739	1.96223	6854	-0.0198709	0.00393095
6903	0.202268	0.00955483	6903	0.179497	0.0230518	6903	-5.84027	1.9583	6853	-0.0198252	0.00392086
6902	0.202347	0.00953783	6902	0.179634	0.0230445	6902	-5.84315	1.95427	6852	-0.0197799	0.0039108
6901	0.202426	0.00952056	6901	0.179772	0.0230372	6901	-5.84603	1.95014	6851	-0.0197353	0.00390076
6900	0.202505	0.00950302	6900	0.179909	0.02303	6900	-5.84891	1.94592	6850	-0.0196912	0.00389075
6899	0.202583	0.00948522	6899	0.180046	0.0230228	6899	-5.85177	1.9416	6849	-0.0196477	0.00388076
6898	0.202662	0.00946716	6898	0.180182	0.0230157	6898	-5.85463	1.93718	6848	-0.0196047	0.0038708
6897	0.20274	0.00944884	6897	0.180319	0.0230086	6897	-5.85748	1.93266	6847	-0.0195624	0.00386087
6896	0.202817	0.00943027	6896	0.180455	0.0230015	6896	-5.86032	1.92806	6846	-0.0195206	0.00385097
6895	0.202895	0.00941146	6895	0.180591	0.0229945	6895	-5.86316	1.92336	6845	-0.0194793	0.0038411
6894	0.202972	0.0093924	6894	0.180726	0.0229875	6894	-5.86599	1.91858	6844	-0.0194387	0.00383126
6893	0.20305	0.0093731	6893	0.180861	0.0229806	6893	-5.86883	1.9137	6843	-0.0193987	0.00382145
6892	0.203127	0.00935356	6892	0.180996	0.0229738	6892	-5.87167	1.90875	6842	-0.0193592	0.00381167
6891	0.203203	0.0093338	6891	0.181131	0.022967	6891	-5.8745	1.90371	6841	-0.0193203	0.00380193
6890	0.20328	0.0093138	6890	0.181265	0.0229602	6890	-5.87734	1.89859	6840	-0.0192821	0.00379222
6889	0.203357	0.00929359	6889	0.181399	0.0229536	6889	-5.88018	1.89339	6839	-0.0192444	0.00378255
6888	0.203433	0.00927315	6888	0.181532	0.0229469	6888	-5.88303	1.88811	6838	-0.0192073	0.00377291
6887	0.203509	0.0092525	6887	0.181666	0.0229404	6887	-5.88589	1.88276	6837	-0.0191709	0.0037633
6886	0.203585	0.00923165	6886	0.181799	0.0229339	6886	-5.88876	1.87734	6836	-0.019135	0.00375374
6885	0.203661	0.00921058	6885	0.181931	0.0229275	6885	-5.89163	1.87185	6835	-0.0190998	0.00374421
6884	0.203736	0.00918931	6884	0.182063	0.0229212	6884	-5.89452	1.86628	6834	-0.0190652	0.00373472
6883	0.203812	0.00916784	6883	0.182195	0.0229149	6883	-5.89742	1.86065	6833	-0.0190312	0.00372528
6882	0.203887	0.00914617	6882	0.182327	0.0229087	6882	-5.90033	1.85496	6832	-0.0189978	0.00371587
6881	0.203963	0.00912432	6881	0.182458	0.0229026	6881	-5.90326	1.8492	6831	-0.0189651	0.0037065
6880	0.204038	0.00910227	6880	0.182589	0.0228966	6880	-5.90621	1.84338	6830	-0.0189329	0.00369718
6879	0.204113	0.00908004	6879	0.182719	0.0228906	6879	-5.90917	1.83751	6829	-0.0189014	0.0036879
6878	0.204188	0.00905763	6878	0.182849	0.0228847	6878	-5.91216	1.83157	6828	-0.0188706	0.00367866
6877	0.204263	0.00903505	6877	0.182978	0.0228789	6877	-5.91516	1.82558	6827	-0.0188404	0.00366947
6876	0.204337	0.00901228	6876	0.183108	0.0228731	6876	-5.91819	1.81954	6826	-0.0188108	0.00366032
6875	0.204412	0.00898935	6875	0.183236	0.0228675	6875	-5.92124	1.81345	6825	-0.0187819	0.00365121
6874	0.204487	0.00896625	6874	0.183365	0.0228619	6874	-5.92432	1.80731	6824	-0.0187536	0.00364216
6873	0.204561	0.00894299	6873	0.183493	0.0228564	6873	-5.92743	1.80112	6823	-0.018726	0.00363315
6872	0.204636	0.00891957	6872	0.18362	0.022851	6872	-5.93056	1.79489	6822	-0.018699	0.00362418
6871	0.20471	0.00889598	6871	0.183748	0.0228456	6871	-5.93373	1.78861	6821	-0.0186727	0.00361527
6870	0.204784	0.00887225	6870	0.183874	0.0228403	6870	-5.93692	1.7823	6820	-0.0186471	0.0036064
6869	0.204858	0.00884836	6869	0.184001	0.0228351	6869	-5.94015	1.77594	6819	-0.0186221	0.00359758
6868	0.204933	0.00882432	6868	0.184127	0.0228299	6868	-5.94341	1.76955	6818	-0.0185978	0.00358881
6867	0.205007	0.00880014	6867	0.184252	0.0228248	6867	-5.94671	1.76313	6817	-0.0185741	0.00358009
6866	0.205081	0.00877581	6866	0.184377	0.0228198	6866	-5.95004	1.75667	6816	-0.0185511	0.00357142
6865	0.205155	0.00875135	6865	0.184502	0.0228149	6865	-5.95341	1.75018	6815	-0.0185289	0.00356279
6864	0.205229	0.00872674	6864	0.184626	0.02281	6864	-5.95683	1.74367	6814	-0.0185072	0.00355422
6863	0.205303	0.00870201	6863	0.184749	0.0228051	6863	-5.96028	1.73712	6813	-0.0184863	0.0035457
6862	0.205377	0.00867714	6862	0.184872	0.0228004	6862	-5.96378	1.73055	6812	-0.0184661	0.00353723
6861	0.205451	0.00865214	6861	0.184995	0.0227956	6861	-5.96732	1.72396	6811	-0.0184465	0.00352881
6860	0.205525	0.00862701	6860	0.185117	0.022791	6860	-5.9709	1.71735	6810	-0.0184277	0.00352043
6859	0.205599	0.00860176	6859	0.185239	0.0227863	6859	-5.97454	1.71072	6809	-0.0184095	0.0035121
6858	0.205673	0.00857638	6858	0.18536	0.0227818	6858	-5.97822	1.70407	6808	-0.018392	0.00350381
6857	0.205747	0.00855088	6857	0.185481	0.0227772	6857	-5.98195	1.69741	6807	-0.0183752	0.00349556
6856	0.205821	0.00852527	6856	0.185601	0.0227727	6856	-5.98573	1.69073	6806	-0.0183592	0.00348735
6855	0.205895	0.00849955	6855	0.185721	0.0227683	6855	-5.98956	1.68404	6805	-0.0183438	0.00347917
6854	0.205969	0.00847372	6854	0.18584	0.0227638	6854	-5.99344	1.67735	6804	-0.0183291	0.00347103
6853	0.206043	0.00844779	6853	0.185959	0.0227595	6853	-5.99737	1.67064	6803	-0.0183151	0.00346292
6852	0.206117	0.00842176	6852	0.186077	0.0227552	6852	-6.00135	1.66393	6802	-0.0183018	0.00345485
6851	0.206191	0.00839565	6851	0.186195	0.0227509	6851	-6.00538	1.65721	6801	-0.0182892	0.0034468
6850	0.206265	0.00836945	6850	0.186312	0.0227467	6850	-6.00946	1.65049	6800	-0.0182773	0.00343879
6849	0.206339	0.00834318	6849	0.186429	0.0227425	6849	-6.01358	1.64376	6799	-0.0182661	0.00343079
6848	0.206413	0.00831684	6848	0.186545	0.0227384	6848	-6.01775	1.63704	6798	-0.0182557	0.00342283
6847	0.206487	0.00829044	6847	0.18666	0.0227343	6847	-6.02196	1.63031	6797	-0.0182459	0.00341488
6846	0.206561	0.00826398	6846	0.186775	0.0227303	6846	-6.02622	1.62359	6796	-0.0182368	0.00340696
6845	0.206635	0.00823747	6845	0.186889	0.0227263	6845	-6.03053	1.61687	6795	-0.0182285	0.00339905
6844	0.206709	0.00821091	6844	0.187002	0.0227224	6844	-6.03488	1.61016	6794	-0.0182209	0.00339117
6843	0.206782	0.00818432	6843	0.187115	0.0227186	6843	-6.03927	1.60346	6793	-0.018214	0.00338329
6842	0.206856	0.00815769	6842	0.187227	0.0227148	6842	-6.0437	1.59677	6792	-0.0182078	0.00337543
6841	0.206929	0.00813104	6841	0.187339	0.0227111	6841	-6.04818	1.59008	6791	-0.0182023	0.00336758
6840	0.207003	0.00810437	6840	0.18745	0.0227074	6840	-6.0527	1.58341	6790	-0.0181975	0.00335974
6839	0.207076	0.00807769	6839	0.18756	0.0227038	6839	-6.05726	1.57675	6789	-0.0181935	0.00335191
6838	0.207149	0.008051	6838	0.187669	0.0227002	6838	-6.06186	1.57011	6788	-0.0181902	0.00334409
6837	0.207222	0.00802432	6837	0.187778	0.0226967	6837	-6.0665	1.56348	6787	-0.0181876	0.00333627
6836	0.207295	0.00799763	6836	0.187886	0.0226932	6836	-6.07117	1.55688	6786	-0.0181857	0.00332845
6835	0.207368	0.00797097	6835	0.187994	0.0226898	6835	-6.07589	1.55029	6785	-0.0181845	0.00332063
6834	0.20744	0.00794432	6834	0.1881	0.0226865	6834	-6.08064	1.54372	6784	-0.0181841	0.00331281
6833	0.207513	0.00791769	6833	0.188206	0.0226832	6833	-6.08544	1.53718	6783	-0.0181844	0.00330499
6832	0.207585	0.0078911	6832	0.188311	0.0226799	6832	-6.09027	1.53066	6782	-0.0181855	0.00329717
6831	0.207657	0.00786455	6831	0.188415	0.0226767	6831	-6.09513	1.52417	6781	-0.0181873	0.00328934
6830	0.207729	0.00783804	6830	0.188519	0.0226736	6830	-6.10003	1.5177	6780	-0.0181898	0.0032815
6829	0.207801	0.00781158	6829	0.188622	0.0226705	6829	-6.10497	1.51127	6779	-0.018193	0.00327366
6828	0.207873	0.00778517	6828	0.188724	0.0226674	6828	-6.10994	1.50486	6778	-0.018197	0.0032658
6827	0.207944	0.00775883	6827	0.188825	0.0226643	6827	-6.11494	1.49849	6777	-0.0182017	0.00325794
6826	0.208015	0.00773256	6826	0.188925	0.0226613	6826	-6.11998	1.49215	6776	-0.0182072	0.00325007
6825	0.208086	0.00770636	6825	0.189025	0.0226583	6825	-6.12505	1.48585	6775	-0.0182133	0.00324219
6824	0.208157	0.00768024	6824	0.189123	0.0226554	6824	-6.13015	1.47958	6774	-0.0182202	0.00323431
6823	0.208227	0.00765421	6823	0.189221	0.0226524	6823	-6.13528	1.47335	6773	-0.0182278	0.00322644
6822	0.208298	0.00762828	6822	0.189318	0.0226495	6822	-6.14044	1.46716	6772	-0.0182361	0.00321857
6821	0.208368	0.00760244	6821	0.189414	0.0226466	6821	-6.14564	1.46101	6771	-0.0182451	0.00321071
6820	0.208438	0.0075767	6820	0.189509	0.0226437	6820	-6.15086	1.4549	6770	-0.0182547	0.00320286
6819	0.208507	0.00755108	6819	0.189604	0.0226408	6819	-6.15611	1.44884	6769	-0.0182651	0.00319503
6818	0.208576	0.00752557	6818	0.189697	0.0226379	6818	-6.16139	1.44282	6768	-0.0182761	0.00318722
6817	0.208646	0.00750018	6817	0.189789	0.022635	6817	-6.1667	1.43684	6767	-0.0182878	0.00317944
6816	0.208714	0.00747492	6816	0.189881	0.0226321	6816	-6.17203	1.43092	6766	-0.0183001	0.00317169
6815	0.208783	0.00744979	6815	0.189971	0.0226292	6815	-6.1774	1.42504	6765	-0.018313	0.00316398
6814	0.208851	0.0074248	6814	0.190061	0.0226263	6814	-6.18278	1.41921	6764	-0.0183266	0.0031563
6813	0.208919	0.00739996	6813	0.19015	0.0226234	6813	-6.1882	1.41343	6763	-0.0183409	0.00314867
6812	0.208986	0.00737526	6812	0.190237	0.0226204	6812	-6.19363	1.4077	6762	-0.0183557	0.00314108
6811	0.209053	0.00735071	6811	0.190324	0.0226174	6811	-6.19909	1.40203	6761	-0.0183712	0.00313355
6810	0.20912	0.00732633	6810	0.19041	0.0226144	6810	-6.20457	1.3964	6760	-0.0183872	0.00312608
6809	0.209187	0.0073021	6809	0.190494	0.0226114	6809	-6.21008	1.39083	6759	-0.0184039	0.00311867
6808	0.209253	0.00727804	6808	0.190578	0.0226083	6808	-6.2156	1.38532	6758	-0.0184212	0.00311132
6807	0.209319	0.00725415	6807	0.190661	0.0226053	6807	-6.22114	1.37986	6757	-0.018439	0.00310405
6806	0.209385	0.00723043	6806	0.190743	0.0226022	6806	-6.22669	1.37445	6756	-0.0184574	0.00309686
6805	0.20945	0.00720689	6805	0.190823	0.0225991	6805	-6.23226	1.3691	6755	-0.0184764	0.00308976
6804	0.209515	0.00718354	6804	0.190903	0.022596	6804	-6.23785	1.3638	6754	-0.0184959	0.00308274
6803	0.20958	0.00716037	6803	0.190982	0.0225928	6803	-6.24345	1.35856	6753	-0.018516	0.00307581
6802	0.209644	0.0071374	6802	0.191059	0.0225897	6802	-6.24906	1.35338	6752	-0.0185366	0.00306899
6801	0.209708	0.00711462	6801	0.191136	0.0225865	6801	-6.25468	1.34825	6751	-0.0185578	0.00306227
6800	0.209772	0.00709205	6800	0.191212	0.0225833	6800	-6.26031	1.34319	6750	-0.0185794	0.00305566
6799	0.209836	0.00706968	6799	0.191287	0.0225801	6799	-6.26594	1.33817	6749	-0.0186016	0.00304916
6798	0.209899	0.00704751	6798	0.19136	0.0225768	6798	-6.27159	1.33322	6748	-0.0186244	0.00304279
6797	0.209961	0.00702556	6797	0.191433	0.0225736	6797	-6.27724	1.32833	6747	-0.0186476	0.00303655
6796	0.210024	0.00700383	6796	0.191504	0.0225703	6796	-6.28289	1.32349	6746	-0.0186713	0.00303043
6795	0.210086	0.00698232	6795	0.191575	0.022567	6795	-6.28855	1.31871	6745	-0.0186955	0.00302446
6794	0.210147	0.00696104	6794	0.191644	0.0225637	6794	-6.29421	1.31399	6744	-0.0187202	0.00301863
6793	0.210208	0.00693999	6793	0.191713	0.0225603	6793	-6.29987	1.30933	6743	-0.0187453	0.00301295
6792	0.210269	0.00691916	6792	0.19178	0.0225569	6792	-6.30553	1.30473	6742	-0.0187709	0.00300743
6791	0.21033	0.00689858	6791	0.191847	0.0225535	6791	-6.31119	1.30019	6741	-0.018797	0.00300207
6790	0.21039	0.00687824	6790	0.191912	0.0225501	6790	-6.31684	1.29571	6740	-0.0188235	0.00299688
6789	0.21045	0.00685814	6789	0.191976	0.0225466	6789	-6.32249	1.29129	6739	-0.0188505	0.00299186
6788	0.21051	0.00683829	6788	0.192039	0.0225431	6788	-6.32814	1.28693	6738	-0.0188778	0.00298702
6787	0.210569	0.00681868	6787	0.192102	0.0225396	6787	-6.33378	1.28263	6737	-0.0189057	0.00298237
6786	0.210628	0.00679934	6786	0.192163	0.022536	6786	-6.33941	1.27839	6736	-0.0189339	0.00297791
6785	0.210686	0.00678025	6785	0.192223	0.0225323	6785	-6.34503	1.27421	6735	-0.0189625	0.00297364
6784	0.210744	0.00676143	6784	0.192281	0.0225287	6784	-6.35064	1.27008	6734	-0.0189916	0.00296958
6783	0.210802	0.00674287	6783	0.192339	0.0225249	6783	-6.35624	1.26602	6733	-0.019021	0.00296572
6782	0.210859	0.00672457	6782	0.192396	0.0225212	6782	-6.36182	1.26202	6732	-0.0190508	0.00296208
6781	0.210916	0.00670655	6781	0.192452	0.0225173	6781	-6.3674	1.25807	6731	-0.019081	0.00295865
6780	0.210972	0.00668881	6780	0.192506	0.0225135	6780	-6.37295	1.25419	6730	-0.0191115	0.00295544
6779	0.211028	0.00667133	6779	0.19256	0.0225095	6779	-6.37849	1.25036	6729	-0.0191425	0.00295245
6778	0.211084	0.00665414	6778	0.192612	0.0225055	6778	-6.38401	1.2466	6728	-0.0191737	0.00294969
6777	0.211139	0.00663723	6777	0.192663	0.0225015	6777	-6.38952	1.24289	6727	-0.0192053	0.00294715
6776	0.211194	0.00662061	6776	0.192713	0.0224974	6776	-6.395	1.23924	6726	-0.0192372	0.00294486
6775	0.211249	0.00660426	6775	0.192762	0.0224932	6775	-6.40045	1.23565	6725	-0.0192695	0.0029428
6774	0.211303	0.00658821	6774	0.19281	0.022489	6774	-6.40588	1.23211	6724	-0.0193021	0.00294098
6773	0.211357	0.00657244	6773	0.192857	0.0224847	6773	-6.41128	1.22863	6723	-0.0193349	0.00293941
6772	0.21141	0.00655696	6772	0.192903	0.0224804	6772	-6.41665	1.22521	6722	-0.0193681	0.00293809
6771	0.211463	0.00654178	6771	0.192948	0.0224761	6771	-6.42199	1.22184	6721	-0.0194015	0.00293702
6770	0.211516	0.00652688	6770	0.192991	0.0224717	6770	-6.42728	1.21853	6720	-0.0194353	0.0029362
6769	0.211568	0.00651227	6769	0.193034	0.0224673	6769	-6.43254	1.21527	6719	-0.0194693	0.00293565
6768	0.21162	0.00649796	6768	0.193076	0.0224628	6768	-6.43776	1.21207	6718	-0.0195035	0.00293536
6767	0.211672	0.00648394	6767	0.193116	0.0224584	6767	-6.44293	1.20892	6717	-0.019538	0.00293533
6766	0.211723	0.00647022	6766	0.193156	0.0224539	6766	-6.44805	1.20582	6716	-0.0195728	0.00293557
6765	0.211773	0.0064568	6765	0.193194	0.0224494	6765	-6.45313	1.20277	6715	-0.0196077	0.00293609
6764	0.211824	0.00644367	6764	0.193232	0.0224449	6764	-6.45815	1.19977	6714	-0.019643	0.00293688
6763	0.211874	0.00643083	6763	0.193269	0.0224404	6763	-6.46312	1.19683	6713	-0.0196784	0.00293794
6762	0.211923	0.0064183	6762	0.193304	0.0224359	6762	-6.46803	1.19393	6712	-0.019714	0.00293929
6761	0.211973	0.00640606	6761	0.193339	0.0224313	6761	-6.47288	1.19108	6711	-0.0197498	0.00294092
6760	0.212022	0.00639412	6760	0.193373	0.0224268	6760	-6.47767	1.18828	6710	-0.0197859	0.00294283
6759	0.21207	0.00638248	6759	0.193405	0.0224223	6759	-6.48239	1.18553	6709	-0.0198221	0.00294503
6758	0.212118	0.00637114	6758	0.193437	0.0224178	6758	-6.48705	1.18282	6708	-0.0198584	0.00294752
6757	0.212166	0.00636009	6757	0.193468	0.0224133	6757	-6.49164	1.18016	6707	-0.019895	0.0029503
6756	0.212213	0.00634935	6756	0.193498	0.0224088	6756	-6.49615	1.17754	6706	-0.0199317	0.00295338
6755	0.21226	0.0063389	6755	0.193527	0.0224043	6755	-6.50059	1.17497	6705	-0.0199685	0.00295675
6754	0.212307	0.00632876	6754	0.193555	0.0223998	6754	-6.50495	1.17244	6704	-0.0200055	0.00296042
6753	0.212353	0.00631891	6753	0.193582	0.0223953	6753	-6.50923	1.16995	6703	-0.0200426	0.00296439
6752	0.212399	0.00630936	6752	0.193609	0.0223909	6752	-6.51343	1.1675	6702	-0.0200798	0.00296865
6751	0.212445	0.0063001	6751	0.193634	0.0223865	6751	-6.51755	1.16509	6701	-0.0201171	0.00297322
6750	0.21249	0.00629115	6750	0.193659	0.0223821	6750	-6.52157	1.16273	6700	-0.0201546	0.0029781
6749	0.212534	0.00628249	6749	0.193682	0.0223777	6749	-6.52551	1.1604	6699	-0.0201921	0.00298328
6748	0.212579	0.00627412	6748	0.193705	0.0223733	6748	-6.52935	1.15811	6698	-0.0202297	0.00298876
6747	0.212623	0.00626605	6747	0.193727	0.022369	6747	-6.5331	1.15585	6697	-0.0202674	0.00299455
6746	0.212667	0.00625827	6746	0.193748	0.0223647	6746	-6.53675	1.15363	6696	-0.0203052	0.00300064
6745	0.21271	0.00625079	6745	0.193768	0.0223604	6745	-6.5403	1.15145	6695	-0.020343	0.00300705
6744	0.212753	0.0062436	6744	0.193788	0.0223561	6744	-6.54375	1.1493	6694	-0.0203808	0.00301376
6743	0.212796	0.0062367	6743	0.193807	0.0223518	6743	-6.54709	1.14718	6693	-0.0204187	0.00302077
6742	0.212838	0.00623008	6742	0.193824	0.0223476	6742	-6.55032	1.1451	6692	-0.0204567	0.00302809
6741	0.21288	0.00622376	6741	0.193841	0.0223434	6741	-6.55344	1.14304	6691	-0.0204946	0.00303571
6740	0.212921	0.00621773	6740	0.193858	0.0223393	6740	-6.55645	1.14102	6690	-0.0205325	0.00304363
6739	0.212963	0.00621197	6739	0.193873	0.0223351	6739	-6.55935	1.13902	6689	-0.0205705	0.00305185
6738	0.213003	0.00620651	6738	0.193888	0.022331	6738	-6.56212	1.13705	6688	-0.0206084	0.00306036
6737	0.213044	0.00620132	6737	0.193902	0.0223269	6737	-6.56478	1.13511	6687	-0.0206463	0.00306917
6736	0.213084	0.00619642	6736	0.193915	0.0223228	6736	-6.56731	1.1332	6686	-0.0206842	0.00307828
6735	0.213124	0.0061918	6735	0.193927	0.0223188	6735	-6.56972	1.13131	6685	-0.0207221	0.00308767
6734	0.213163	0.00618745	6734	0.193939	0.0223148	6734	-6.572	1.12944	6684	-0.0207598	0.00309735
6733	0.213202	0.00618338	6733	0.19395	0.0223108	6733	-6.57415	1.1276	6683	-0.0207976	0.00310732
6732	0.213241	0.00617959	6732	0.19396	0.0223068	6732	-6.57617	1.12579	6682	-0.0208352	0.00311756
6731	0.21328	0.00617608	6731	0.193969	0.0223029	6731	-6.57807	1.124	6681	-0.0208728	0.00312809
6730	0.213318	0.00617284	6730	0.193978	0.022299	6730	-6.57983	1.12223	6680	-0.0209102	0.0031389
6729	0.213355	0.00616988	6729	0.193986	0.0222952	6729	-6.58147	1.12049	6679	-0.0209476	0.00314998
6728	0.213393	0.0061672	6728	0.193994	0.0222914	6728	-6.58299	1.11877	6678	-0.0209848	0.00316133
6727	0.21343	0.00616479	6727	0.194	0.0222877	6727	-6.58438	1.11708	6677	-0.021022	0.00317295
6726	0.213466	0.00616266	6726	0.194006	0.022284	6726	-6.58564	1.11542	6676	-0.0210589	0.00318483
6725	0.213503	0.00616081	6725	0.194011	0.0222805	6725	-6.58677	1.11378	6675	-0.0210958	0.00319698
6724	0.213538	0.00615922	6724	0.194016	0.022277	6724	-6.58778	1.11217	6674	-0.0211325	0.00320939
6723	0.213574	0.00615792	6723	0.19402	0.0222735	6723	-6.58866	1.11058	6673	-0.021169	0.00322205
6722	0.213609	0.00615689	6722	0.194023	0.0222702	6722	-6.58942	1.10902	6672	-0.0212054	0.00323497
6721	0.213644	0.00615613	6721	0.194026	0.0222669	6721	-6.59006	1.10749	6671	-0.0212415	0.00324813
6720	0.213678	0.00615564	6720	0.194028	0.0222638	6720	-6.59057	1.10598	6670	-0.0212775	0.00326154
6719	0.213713	0.00615542	6719	0.194029	0.0222607	6719	-6.59095	1.10451	6669	-0.0213133	0.00327519
6718	0.213746	0.00615548	6718	0.19403	0.0222577	6718	-6.59121	1.10306	6668	-0.0213488	0.00328908
6717	0.21378	0.0061558	6717	0.19403	0.0222548	6717	-6.59135	1.10164	6667	-0.0213841	0.00330321
6716	0.213813	0.0061564	6716	0.19403	0.0222521	6716	-6.59136	1.10025	6666	-0.0214192	0.00331757
6715	0.213845	0.00615726	6715	0.194029	0.0222494	6715	-6.59125	1.09888	6665	-0.0214541	0.00333215
6714	0.213878	0.00615838	6714	0.194027	0.0222468	6714	-6.59101	1.09755	6664	-0.0214887	0.00334696
6713	0.213909	0.00615977	6713	0.194025	0.0222444	6713	-6.59066	1.09625	6663	-0.021523	0.00336199
6712	0.213941	0.00616142	6712	0.194022	0.0222421	6712	-6.59017	1.09498	6662	-0.021557	0.00337724
6711	0.213972	0.00616333	6711	0.194019	0.0222399	6711	-6.58957	1.09373	6661	-0.0215908	0.0033927
6710	0.214003	0.00616551	6710	0.194015	0.0222378	6710	-6.58885	1.09252	6660	-0.0216242	0.00340837
6709	0.214033	0.00616794	6709	0.19401	0.0222358	6709	-6.588	1.09134	6659	-0.0216574	0.00342425
6708	0.214063	0.00617063	6708	0.194005	0.0222339	6708	-6.58703	1.09019	6658	-0.0216902	0.00344032
6707	0.214093	0.00617357	6707	0.194	0.0222322	6707	-6.58594	1.08908	6657	-0.0217227	0.0034566
6706	0.214122	0.00617677	6706	0.193994	0.0222306	6706	-6.58473	1.08799	6656	-0.0217549	0.00347307
6705	0.214151	0.00618021	6705	0.193987	0.0222292	6705	-6.5834	1.08694	6655	-0.0217867	0.00348973
6704	0.21418	0.00618391	6704	0.19398	0.0222278	6704	-6.58194	1.08592	6654	-0.0218182	0.00350658
6703	0.214208	0.00618785	6703	0.193972	0.0222266	6703	-6.58037	1.08494	6653	-0.0218493	0.00352362
6702	0.214236	0.00619203	6702	0.193964	0.0222255	6702	-6.57868	1.08398	6652	-0.02188	0.00354083
6701	0.214263	0.00619646	6701	0.193955	0.0222246	6701	-6.57686	1.08307	6651	-0.0219104	0.00355822
6700	0.21429	0.00620112	6700	0.193946	0.0222237	6700	-6.57493	1.08218	6650	-0.0219403	0.00357578
6699	0.214317	0.00620603	6699	0.193936	0.022223	6699	-6.57288	1.08133	6649	-0.0219699	0.00359351
6698	0.214343	0.00621116	6698	0.193926	0.0222225	6698	-6.57071	1.08052	6648	-0.021999	0.0036114
6697	0.214369	0.00621653	6697	0.193915	0.0222221	6697	-6.56841	1.07974	6647	-0.0220278	0.00362945
6696	0.214395	0.00622213	6696	0.193904	0.0222217	6696	-6.56601	1.07899	6646	-0.0220561	0.00364765
6695	0.21442	0.00622796	6695	0.193893	0.0222216	6695	-6.56348	1.07829	6645	-0.022084	0.00366601
6694	0.214445	0.006234	6694	0.193881	0.0222215	6694	-6.56083	1.07761	6644	-0.0221115	0.0036845
6693	0.214469	0.00624027	6693	0.193868	0.0222216	6693	-6.55807	1.07698	6643	-0.0221385	0.00370314
6692	0.214493	0.00624674	6692	0.193855	0.0222219	6692	-6.55519	1.07638	6642	-0.0221651	0.00372191
6691	0.214516	0.00625343	6691	0.193842	0.0222223	6691	-6.55219	1.07581	6641	-0.0221913	0.00374081
6690	0.21454	0.00626032	6690	0.193828	0.0222228	6690	-6.54908	1.07528	6640	-0.022217	0.00375984
6689	0.214562	0.00626741	6689	0.193814	0.0222235	6689	-6.54586	1.07479	6639	-0.0222423	0.00377899
6688	0.214585	0.00627469	6688	0.1938	0.0222244	6688	-6.54252	1.07433	6638	-0.0222671	0.00379826
6687	0.214607	0.00628217	6687	0.193785	0.0222254	6687	-6.53907	1.07391	6637	-0.0222914	0.00381763
6686	0.214628	0.00628982	6686	0.193769	0.0222266	6686	-6.5355	1.07352	6636	-0.0223153	0.00383712
6685	0.214649	0.00629766	6685	0.193754	0.0222279	6685	-6.53183	1.07317	6635	-0.0223387	0.00385671
6684	0.21467	0.00630567	6684	0.193737	0.0222294	6684	-6.52804	1.07286	6634	-0.0223616	0.0038764
6683	0.21469	0.00631384	6683	0.193721	0.0222311	6683	-6.52414	1.07258	6633	-0.0223841	0.00389618
6682	0.21471	0.00632219	6682	0.193704	0.022233	6682	-6.52013	1.07234	6632	-0.022406	0.00391606
6681	0.214729	0.00633069	6681	0.193687	0.022235	6681	-6.51602	1.07213	6631	-0.0224275	0.00393601
6680	0.214748	0.00633934	6680	0.193669	0.0222373	6680	-6.51179	1.07196	6630	-0.0224484	0.00395605
6679	0.214767	0.00634814	6679	0.193651	0.0222397	6679	-6.50746	1.07182	6629	-0.0224689	0.00397617
6678	0.214785	0.00635708	6678	0.193633	0.0222423	6678	-6.50302	1.07171	6628	-0.0224888	0.00399635
6677	0.214802	0.00636616	6677	0.193614	0.022245	6677	-6.49847	1.07165	6627	-0.0225082	0.00401661
6676	0.21482	0.00637537	6676	0.193595	0.022248	6676	-6.49381	1.07161	6626	-0.0225271	0.00403692
6675	0.214836	0.00638471	6675	0.193576	0.0222512	6675	-6.48906	1.07161	6625	-0.0225455	0.0040573
6674	0.214852	0.00639417	6674	0.193556	0.0222545	6674	-6.48419	1.07165	6624	-0.0225633	0.00407773
6673	0.214868	0.00640374	6673	0.193536	0.022258	6673	-6.47922	1.07172	6623	-0.0225806	0.0040982
6672	0.214883	0.00641342	6672	0.193516	0.0222617	6672	-6.47415	1.07182	6622	-0.0225974	0.00411872
6671	0.214898	0.00642321	6671	0.193495	0.0222656	6671	-6.46898	1.07196	6621	-0.0226136	0.00413929
6670	0.214913	0.00643309	6670	0.193474	0.0222697	6670	-6.4637	1.07213	6620	-0.0226292	0.00415989
6669	0.214926	0.00644306	6669	0.193453	0.0222739	6669	-6.45833	1.07233	6619	-0.0226443	0.00418052
6668	0.21494	0.00645312	6668	0.193431	0.0222784	6668	-6.45285	1.07257	6618	-0.0226588	0.00420118
6667	0.214953	0.00646326	6667	0.193409	0.022283	6667	-6.44727	1.07284	6617	-0.0226728	0.00422186
6666	0.214965	0.00647347	6666	0.193387	0.0222878	6666	-6.44159	1.07314	6616	-0.0226861	0.00424256
6665	0.214977	0.00648376	6665	0.193365	0.0222928	6665	-6.43582	1.07347	6615	-0.0226989	0.00426327
6664	0.214988	0.0064941	6664	0.193342	0.022298	6664	-6.42994	1.07383	6614	-0.0227111	0.004284
6663	0.214999	0.00650451	6663	0.193319	0.0223033	6663	-6.42397	1.07423	6613	-0.0227227	0.00430472
6662	0.215009	0.00651496	6662	0.193296	0.0223088	6662	-6.4179	1.07465	6612	-0.0227337	0.00432545
6661	0.215019	0.00652546	6661	0.193273	0.0223145	6661	-6.41174	1.07511	6611	-0.0227441	0.00434616
6660	0.215029	0.006536	6660	0.193249	0.0223203	6660	-6.40548	1.0756	6610	-0.0227538	0.00436686
6659	0.215037	0.00654658	6659	0.193225	0.0223263	6659	-6.39912	1.07611	6609	-0.0227629	0.00438753
6658	0.215046	0.00655718	6658	0.193201	0.0223325	6658	-6.39268	1.07666	6608	-0.0227713	0.00440818
6657	0.215053	0.00656781	6657	0.193177	0.0223389	6657	-6.38613	1.07723	6607	-0.0227791	0.00442879
6656	0.215061	0.00657845	6656	0.193152	0.0223453	6656	-6.3795	1.07783	6606	-0.0227862	0.00444936
6655	0.215067	0.00658911	6655	0.193128	0.022352	6655	-6.37277	1.07846	6605	-0.0227927	0.00446989
6654	0.215074	0.00659978	6654	0.193103	0.0223588	6654	-6.36595	1.07912	6604	-0.0227984	0.00449036
6653	0.215079	0.00661044	6653	0.193078	0.0223657	6653	-6.35904	1.0798	6603	-0.0228035	0.00451077
6652	0.215084	0.0066211	6652	0.193052	0.0223728	6652	-6.35204	1.08051	6602	-0.0228078	0.00453112
6651	0.215089	0.00663175	6651	0.193027	0.02238	6651	-6.34495	1.08125	6601	-0.0228115	0.00455139
6650	0.215093	0.00664239	6650	0.193001	0.0223873	6650	-6.33777	1.08201	6600	-0.0228144	0.00457159
6649	0.215096	0.00665301	6649	0.192975	0.0223948	6649	-6.33051	1.08279	6599	-0.0228166	0.0045917
6648	0.215099	0.00666363	6648	0.192949	0.0224024	6648	-6.32316	1.0836	6598	-0.022818	0.00461173
6647	0.215101	0.00667422	6647	0.192923	0.0224102	6647	-6.31573	1.08443	6597	-0.0228186	0.00463165
6646	0.215103	0.00668479	6646	0.192896	0.0224181	6646	-6.30821	1.08528	6596	-0.0228186	0.00465148
6645	0.215104	0.00669534	6645	0.19287	0.0224261	6645	-6.30062	1.08616	6595	-0.0228177	0.00467119
6644	0.215105	0.00670586	6644	0.192843	0.0224343	6644	-6.29294	1.08705	6594	-0.022816	0.0046908
6643	0.215105	0.00671636	6643	0.192817	0.0224426	6643	-6.28519	1.08797	6593	-0.0228136	0.00471028
6642	0.215105	0.00672683	6642	0.19279	0.0224511	6642	-6.27736	1.0889	6592	-0.0228103	0.00472963
6641	0.215104	0.00673726	6641	0.192763	0.0224598	6641	-6.26945	1.08986	6591	-0.0228063	0.00474885
6640	0.215103	0.00674767	6640	0.192736	0.0224685	6640	-6.26147	1.09083	6590	-0.0228014	0.00476793
6639	0.215101	0.00675804	6639	0.192709	0.0224774	6639	-6.25342	1.09181	6589	-0.0227957	0.00478687
6638	0.215099	0.00676837	6638	0.192681	0.0224865	6638	-6.2453	1.09282	6588	-0.0227891	0.00480565
6637	0.215096	0.00677867	6637	0.192654	0.0224957	6637	-6.23711	1.09383	6587	-0.0227817	0.00482428
6636	0.215093	0.00678892	6636	0.192627	0.0225051	6636	-6.22886	1.09487	6586	-0.0227735	0.00484275
6635	0.215089	0.00679912	6635	0.1926	0.0225146	6635	-6.22053	1.09591	6585	-0.0227643	0.00486104
6634	0.215084	0.00680929	6634	0.192572	0.0225242	6634	-6.21214	1.09697	6584	-0.0227543	0.00487916
6633	0.21508	0.0068194	6633	0.192545	0.022534	6633	-6.20369	1.09804	6583	-0.0227434	0.0048971
6632	0.215074	0.00682946	6632	0.192517	0.0225439	6632	-6.19518	1.09911	6582	-0.0227316	0.00491485
6631	0.215069	0.00683947	6631	0.19249	0.022554	6631	-6.1866	1.1002	6581	-0.0227189	0.00493241
6630	0.215062	0.00684942	6630	0.192462	0.0225642	6630	-6.17797	1.1013	6580	-0.0227053	0.00494977
6629	0.215056	0.00685932	6629	0.192435	0.0225745	6629	-6.16928	1.10241	6579	-0.0226907	0.00496692
6628	0.215048	0.00686915	6628	0.192408	0.0225849	6628	-6.16054	1.10352	6578	-0.0226752	0.00498386
6627	0.215041	0.00687893	6627	0.19238	0.0225955	6627	-6.15174	1.10464	6577	-0.0226588	0.00500059
6626	0.215033	0.00688863	6626	0.192353	0.0226062	6626	-6.14288	1.10576	6576	-0.0226414	0.00501709
6625	0.215024	0.00689827	6625	0.192326	0.022617	6625	-6.13398	1.10689	6575	-0.022623	0.00503336
6624	0.215015	0.00690784	6624	0.192298	0.022628	6624	-6.12502	1.10802	6574	-0.0226037	0.0050494
6623	0.215006	0.00691734	6623	0.192271	0.0226391	6623	-6.11602	1.10915	6573	-0.0225834	0.0050652
6622	0.214996	0.00692676	6622	0.192244	0.0226502	6622	-6.10697	1.11028	6572	-0.0225621	0.00508075
6621	0.214985	0.0069361	6621	0.192217	0.0226615	6621	-6.09787	1.11142	6571	-0.0225398	0.00509604
6620	0.214974	0.00694536	6620	0.19219	0.0226729	6620	-6.08873	1.11255	6570	-0.0225166	0.00511107
6619	0.214963	0.00695454	6619	0.192163	0.0226844	6619	-6.07954	1.11368	6569	-0.0224924	0.00512582
6618	0.214951	0.00696364	6618	0.192136	0.022696	6618	-6.07032	1.11481	6568	-0.0224671	0.00514031
6617	0.214939	0.00697265	6617	0.19211	0.0227077	6617	-6.06105	1.11593	6567	-0.0224409	0.0051545
6616	0.214927	0.00698156	6616	0.192083	0.0227194	6616	-6.05175	1.11706	6566	-0.0224137	0.00516841
6615	0.214914	0.00699038	6615	0.192057	0.0227313	6615	-6.04241	1.11817	6565	-0.0223855	0.00518202
6614	0.2149	0.00699911	6614	0.192031	0.0227432	6614	-6.03303	1.11928	6564	-0.0223563	0.00519532
6613	0.214886	0.00700774	6613	0.192005	0.0227552	6613	-6.02362	1.12039	6563	-0.0223261	0.00520831
6612	0.214872	0.00701626	6612	0.191979	0.0227673	6612	-6.01416	1.12148	6562	-0.0222949	0.00522099
6611	0.214858	0.00702469	6611	0.191953	0.0227795	6611	-6.00467	1.12257	6561	-0.0222627	0.00523333
6610	0.214842	0.007033	6610	0.191927	0.0227917	6610	-5.99513	1.12365	6560	-0.0222294	0.00524535
6609	0.214827	0.00704121	6609	0.191902	0.022804	6609	-5.98556	1.12472	6559	-0.0221951	0.00525702
6608	0.214811	0.0070493	6608	0.191877	0.0228164	6608	-5.97594	1.12578	6558	-0.0221599	0.00526835
6607	0.214794	0.00705728	6607	0.191852	0.0228288	6607	-5.96629	1.12684	6557	-0.0221236	0.00527933
6606	0.214777	0.00706514	6606	0.191827	0.0228414	6606	-5.95659	1.12788	6556	-0.0220862	0.00528995
6605	0.21476	0.00707288	6605	0.191803	0.0228539	6605	-5.94685	1.12891	6555	-0.0220478	0.0053002
6604	0.214742	0.00708049	6604	0.191778	0.0228665	6604	-5.93707	1.12992	6554	-0.0220084	0.00531007
6603	0.214724	0.00708798	6603	0.191754	0.0228792	6603	-5.92724	1.13093	6553	-0.021968	0.00531957
6602	0.214706	0.00709534	6602	0.19173	0.0228919	6602	-5.91737	1.13192	6552	-0.0219265	0.00532868
6601	0.214686	0.00710256	6601	0.191707	0.0229047	6601	-5.90745	1.1329	6551	-0.021884	0.00533739
6600	0.214667	0.00710965	6600	0.191683	0.0229175	6600	-5.89749	1.13386	6550	-0.0218404	0.00534571
6599	0.214647	0.00711659	6599	0.19166	0.0229304	6599	-5.88749	1.13481	6549	-0.0217958	0.00535362
6598	0.214627	0.00712339	6598	0.191638	0.0229432	6598	-5.87743	1.13574	6548	-0.0217501	0.00536111
6597	0.214606	0.00713004	6597	0.191615	0.0229561	6597	-5.86733	1.13666	6547	-0.0217034	0.00536819
6596	0.214584	0.00713655	6596	0.191593	0.0229691	6596	-5.85719	1.13756	6546	-0.0216556	0.00537483
6595	0.214563	0.00714289	6595	0.191571	0.022982	6595	-5.84699	1.13844	6545	-0.0216067	0.00538105
6594	0.21454	0.00714909	6594	0.191549	0.0229949	6594	-5.83675	1.1393	6544	-0.0215568	0.00538682
6593	0.214518	0.00715512	6593	0.191528	0.0230079	6593	-5.82646	1.14014	6543	-0.0215058	0.00539215
6592	0.214494	0.00716098	6592	0.191507	0.0230208	6592	-5.81611	1.14097	6542	-0.0214538	0.00539702
6591	0.214471	0.00716667	6591	0.191487	0.0230338	6591	-5.80572	1.14177	6541	-0.0214006	0.00540144
6590	0.214447	0.0071722	6590	0.191466	0.0230467	6590	-5.79528	1.14255	6540	-0.0213464	0.00540539
6589	0.214422	0.00717755	6589	0.191446	0.0230596	6589	-5.78479	1.14331	6539	-0.0212911	0.00540887
6588	0.214397	0.00718272	6588	0.191427	0.0230725	6588	-5.77424	1.14405	6538	-0.0212347	0.00541187
6587	0.214372	0.0071877	6587	0.191408	0.0230854	6587	-5.76364	1.14477	6537	-0.0211772	0.00541439
6586	0.214346	0.0071925	6586	0.191389	0.0230982	6586	-5.75299	1.14546	6536	-0.0211187	0.00541644
6585	0.214319	0.00719711	6585	0.191371	0.0231109	6585	-5.74229	1.14613	6535	-0.021059	0.00541802
6584	0.214292	0.00720152	6584	0.191353	0.0231236	6584	-5.73153	1.14677	6534	-0.0209984	0.00541914
6583	0.214265	0.00720573	6583	0.191335	0.0231363	6583	-5.72072	1.14738	6533	-0.0209367	0.00541981
6582	0.214237	0.00720975	6582	0.191318	0.0231488	6582	-5.70985	1.14797	6532	-0.0208741	0.00542003
6581	0.214209	0.00721355	6581	0.191301	0.0231613	6581	-5.69893	1.14854	6531	-0.0208104	0.00541982
6580	0.21418	0.00721715	6580	0.191285	0.0231737	6580	-5.68795	1.14907	6530	-0.0207458	0.00541919
6579	0.214151	0.00722054	6579	0.191269	0.023186	6579	-5.67691	1.14958	6529	-0.0206802	0.00541813
6578	0.214121	0.00722371	6578	0.191254	0.0231982	6578	-5.66582	1.15005	6528	-0.0206138	0.00541666
6577	0.214091	0.00722665	6577	0.191239	0.0232103	6577	-5.65467	1.1505	6527	-0.0205463	0.00541479
6576	0.21406	0.00722938	6576	0.191224	0.0232222	6576	-5.64346	1.15092	6526	-0.020478	0.00541253
6575	0.214029	0.00723188	6575	0.19121	0.0232341	6575	-5.63219	1.1513	6525	-0.0204089	0.00540988
6574	0.213997	0.00723415	6574	0.191197	0.0232458	6574	-5.62086	1.15166	6524	-0.0203388	0.00540685
6573	0.213965	0.0072362	6573	0.191184	0.0232574	6573	-5.60948	1.15198	6523	-0.0202679	0.00540344
6572	0.213932	0.00723804	6572	0.191171	0.0232688	6572	-5.59805	1.15228	6522	-0.0201962	0.00539968
6571	0.213899	0.00723966	6571	0.191159	0.0232801	6571	-5.58657	1.15254	6521	-0.0201237	0.00539556
6570	0.213866	0.00724107	6570	0.191148	0.0232912	6570	-5.57504	1.15278	6520	-0.0200504	0.00539109
6569	0.213832	0.00724227	6569	0.191137	0.0233022	6569	-5.56347	1.15298	6519	-0.0199763	0.00538629
6568	0.213798	0.00724327	6568	0.191127	0.023313	6568	-5.55185	1.15316	6518	-0.0199015	0.00538115
6567	0.213763	0.00724407	6567	0.191117	0.0233237	6567	-5.54019	1.15331	6517	-0.0198259	0.00537569
6566	0.213728	0.00724467	6566	0.191108	0.0233342	6566	-5.52849	1.15343	6516	-0.0197496	0.00536991
6565	0.213693	0.00724507	6565	0.1911	0.0233445	6565	-5.51676	1.15352	6515	-0.0196726	0.00536383
6564	0.213658	0.00724529	6564	0.191092	0.0233546	6564	-5.50499	1.15358	6514	-0.0195949	0.00535744
6563	0.213622	0.00724531	6563	0.191085	0.0233646	6563	-5.49319	1.15362	6513	-0.0195166	0.00535076
6562	0.213585	0.00724515	6562	0.191079	0.0233744	6562	-5.48136	1.15363	6512	-0.0194376	0.0053438
6561	0.213549	0.00724481	6561	0.191074	0.023384	6561	-5.4695	1.15361	6511	-0.0193579	0.00533656
6560	0.213512	0.00724429	6560	0.191069	0.0233934	6560	-5.45761	1.15356	6510	-0.0192777	0.00532905
6559	0.213475	0.0072436	6559	0.191065	0.0234025	6559	-5.4457	1.15349	6509	-0.0191969	0.00532128
6558	0.213437	0.00724273	6558	0.191061	0.0234115	6558	-5.43377	1.15339	6508	-0.0191154	0.00531326
6557	0.2134	0.00724169	6557	0.191059	0.0234203	6557	-5.42182	1.15327	6507	-0.0190335	0.00530498
6556	0.213362	0.00724049	6556	0.191057	0.0234288	6556	-5.40986	1.15312	6506	-0.0189509	0.00529647
6555	0.213324	0.00723912	6555	0.191056	0.0234371	6555	-5.39788	1.15294	6505	-0.0188679	0.00528772
6554	0.213286	0.0072376	6554	0.191056	0.0234452	6554	-5.38589	1.15274	6504	-0.0187843	0.00527875
6553	0.213247	0.00723591	6553	0.191057	0.023453	6553	-5.37388	1.15251	6503	-0.0187003	0.00526956
6552	0.213209	0.00723407	6552	0.191059	0.0234605	6552	-5.36187	1.15226	6502	-0.0186157	0.00526016
[truncated: 1,002 more rows]

## Sheet: Siple Dome Splines
SD 15N Spline Age (yr)	SD 15N Spline (per mil)	SD 15N Spline Error (per mil)	SD O2/N2 Spline Age (yr)	SD O2/N2 Spline (per mil)	SD O2/N2 Spline Error (per mil)
17000	0.243082	0.0219768	17000	-9.61502	3.69333
16999	0.243079	0.0218959	16999	-9.61926	3.66165
16998	0.243077	0.0218154	16998	-9.6235	3.63019
16997	0.243074	0.0217351	16997	-9.62776	3.59895
16996	0.243071	0.0216551	16996	-9.63202	3.56793
16995	0.243068	0.0215753	16995	-9.6363	3.53713
16994	0.243064	0.0214958	16994	-9.64058	3.50654
16993	0.24306	0.0214166	16993	-9.64487	3.47617
16992	0.243057	0.0213376	16992	-9.64917	3.44602
16991	0.243052	0.0212589	16991	-9.65348	3.41608
16990	0.243048	0.0211804	16990	-9.6578	3.38636
16989	0.243044	0.0211021	16989	-9.66212	3.35685
16988	0.243039	0.0210242	16988	-9.66645	3.32755
16987	0.243034	0.0209464	16987	-9.67079	3.29847
16986	0.243029	0.0208689	16986	-9.67514	3.2696
16985	0.243024	0.0207916	16985	-9.6795	3.24094
16984	0.243018	0.0207146	16984	-9.68386	3.2125
16983	0.243013	0.0206378	16983	-9.68823	3.18426
16982	0.243007	0.0205612	16982	-9.69261	3.15624
16981	0.243001	0.0204849	16981	-9.697	3.12843
16980	0.242994	0.0204088	16980	-9.70139	3.10082
16979	0.242988	0.0203329	16979	-9.70579	3.07343
16978	0.242981	0.0202572	16978	-9.7102	3.04624
16977	0.242974	0.0201818	16977	-9.71461	3.01926
16976	0.242967	0.0201065	16976	-9.71903	2.99249
16975	0.24296	0.0200315	16975	-9.72346	2.96593
16974	0.242953	0.0199568	16974	-9.72789	2.93957
16973	0.242945	0.0198822	16973	-9.73233	2.91342
16972	0.242937	0.0198078	16972	-9.73677	2.88747
16971	0.24293	0.0197337	16971	-9.74122	2.86173
16970	0.242921	0.0196598	16970	-9.74568	2.83619
16969	0.242913	0.019586	16969	-9.75014	2.81086
16968	0.242905	0.0195125	16968	-9.7546	2.78573
16967	0.242896	0.0194392	16967	-9.75908	2.7608
16966	0.242887	0.0193661	16966	-9.76355	2.73607
16965	0.242878	0.0192932	16965	-9.76803	2.71155
16964	0.242869	0.0192205	16964	-9.77252	2.68723
16963	0.242859	0.0191481	16963	-9.77701	2.66311
16962	0.24285	0.0190758	16962	-9.78151	2.63919
16961	0.24284	0.0190037	16961	-9.78601	2.61547
16960	0.24283	0.0189318	16960	-9.79051	2.59195
16959	0.24282	0.0188601	16959	-9.79502	2.56863
16958	0.24281	0.0187886	16958	-9.79954	2.5455
16957	0.242799	0.0187173	16957	-9.80405	2.52258
16956	0.242789	0.0186462	16956	-9.80858	2.49985
16955	0.242778	0.0185753	16955	-9.8131	2.47732
16954	0.242767	0.0185046	16954	-9.81763	2.45499
16953	0.242756	0.0184341	16953	-9.82216	2.43285
16952	0.242745	0.0183638	16952	-9.8267	2.41091
16951	0.242734	0.0182936	16951	-9.83123	2.38917
16950	0.242722	0.0182237	16950	-9.83578	2.36762
16949	0.24271	0.018154	16949	-9.84032	2.34626
16948	0.242698	0.0180844	16948	-9.84487	2.3251
16947	0.242686	0.018015	16947	-9.84942	2.30414
16946	0.242674	0.0179459	16946	-9.85397	2.28336
16945	0.242662	0.0178769	16945	-9.85852	2.26278
16944	0.242649	0.0178081	16944	-9.86308	2.24239
16943	0.242637	0.0177395	16943	-9.86764	2.2222
16942	0.242624	0.017671	16942	-9.8722	2.2022
16941	0.242611	0.0176028	16941	-9.87676	2.18238
16940	0.242598	0.0175347	16940	-9.88133	2.16276
16939	0.242585	0.0174669	16939	-9.88589	2.14333
16938	0.242571	0.0173992	16938	-9.89046	2.12409
16937	0.242558	0.0173317	16937	-9.89503	2.10504
16936	0.242544	0.0172644	16936	-9.8996	2.08617
16935	0.24253	0.0171973	16935	-9.90417	2.0675
16934	0.242516	0.0171303	16934	-9.90874	2.04902
16933	0.242502	0.0170636	16933	-9.91331	2.03072
16932	0.242488	0.016997	16932	-9.91788	2.01261
16931	0.242473	0.0169306	16931	-9.92246	1.99469
16930	0.242459	0.0168644	16930	-9.92703	1.97695
16929	0.242444	0.0167984	16929	-9.9316	1.95941
16928	0.242429	0.0167326	16928	-9.93618	1.94204
16927	0.242414	0.0166669	16927	-9.94075	1.92487
16926	0.242399	0.0166015	16926	-9.94533	1.90788
16925	0.242384	0.0165362	16925	-9.9499	1.89107
16924	0.242369	0.0164711	16924	-9.95447	1.87445
16923	0.242353	0.0164062	16923	-9.95905	1.85802
16922	0.242337	0.0163415	16922	-9.96362	1.84176
16921	0.242322	0.0162769	16921	-9.96819	1.82569
16920	0.242306	0.0162126	16920	-9.97276	1.80981
16919	0.24229	0.0161484	16919	-9.97733	1.79411
16918	0.242274	0.0160844	16918	-9.9819	1.77858
16917	0.242258	0.0160206	16917	-9.98646	1.76325
16916	0.242241	0.015957	16916	-9.99103	1.74809
16915	0.242225	0.0158936	16915	-9.99559	1.73311
16914	0.242208	0.0158303	16914	-10.0002	1.71832
16913	0.242191	0.0157672	16913	-10.0047	1.7037
16912	0.242174	0.0157044	16912	-10.0093	1.68927
16911	0.242157	0.0156417	16911	-10.0138	1.67502
16910	0.24214	0.0155791	16910	-10.0184	1.66094
16909	0.242123	0.0155168	16909	-10.0229	1.64704
16908	0.242106	0.0154547	16908	-10.0275	1.63333
16907	0.242088	0.0153927	16907	-10.032	1.61979
16906	0.242071	0.0153309	16906	-10.0366	1.60642
16905	0.242053	0.0152694	16905	-10.0411	1.59324
16904	0.242035	0.015208	16904	-10.0456	1.58023
16903	0.242018	0.0151467	16903	-10.0502	1.5674
16902	0.242	0.0150857	16902	-10.0547	1.55474
16901	0.241981	0.0150249	16901	-10.0592	1.54226
16900	0.241963	0.0149642	16900	-10.0638	1.52996
16899	0.241945	0.0149037	16899	-10.0683	1.51783
16898	0.241927	0.0148434	16898	-10.0728	1.50587
16897	0.241908	0.0147833	16897	-10.0773	1.49409
16896	0.241889	0.0147234	16896	-10.0818	1.48248
16895	0.241871	0.0146637	16895	-10.0863	1.47105
16894	0.241852	0.0146042	16894	-10.0908	1.45978
16893	0.241833	0.0145448	16893	-10.0953	1.44869
16892	0.241814	0.0144856	16892	-10.0998	1.43777
16891	0.241795	0.0144267	16891	-10.1043	1.42702
16890	0.241776	0.0143679	16890	-10.1087	1.41644
16889	0.241756	0.0143093	16889	-10.1132	1.40603
16888	0.241737	0.0142508	16888	-10.1177	1.39579
16887	0.241718	0.0141926	16887	-10.1222	1.38572
16886	0.241698	0.0141346	16886	-10.1266	1.37581
16885	0.241678	0.0140767	16885	-10.1311	1.36608
16884	0.241659	0.0140191	16884	-10.1355	1.35651
16883	0.241639	0.0139616	16883	-10.14	1.34711
16882	0.241619	0.0139043	16882	-10.1444	1.33787
16881	0.241599	0.0138472	16881	-10.1488	1.3288
16880	0.241579	0.0137903	16880	-10.1532	1.31989
16879	0.241559	0.0137336	16879	-10.1577	1.31114
16878	0.241538	0.013677	16878	-10.1621	1.30256
16877	0.241518	0.0136207	16877	-10.1665	1.29415
16876	0.241498	0.0135645	16876	-10.1709	1.28589
16875	0.241477	0.0135086	16875	-10.1752	1.27779
16874	0.241457	0.0134528	16874	-10.1796	1.26986
16873	0.241436	0.0133972	16873	-10.184	1.26208
16872	0.241415	0.0133418	16872	-10.1884	1.25447
16871	0.241394	0.0132866	16871	-10.1927	1.24701
16870	0.241373	0.0132316	16870	-10.1971	1.23971
16869	0.241353	0.0131768	16869	-10.2014	1.23257
16868	0.241332	0.0131222	16868	-10.2058	1.22558
16867	0.24131	0.0130678	16867	-10.2101	1.21874
16866	0.241289	0.0130135	16866	-10.2144	1.21206
16865	0.241268	0.0129595	16865	-10.2187	1.20554
16864	0.241247	0.0129056	16864	-10.223	1.19916
16863	0.241226	0.012852	16863	-10.2273	1.19294
16862	0.241204	0.0127985	16862	-10.2316	1.18687
16861	0.241183	0.0127452	16861	-10.2359	1.18094
16860	0.241162	0.0126922	16860	-10.2402	1.17517
16859	0.24114	0.0126393	16859	-10.2444	1.16954
16858	0.241119	0.0125867	16858	-10.2487	1.16406
16857	0.241098	0.0125342	16857	-10.253	1.15872
16856	0.241077	0.012482	16856	-10.2572	1.15353
16855	0.241055	0.0124299	16855	-10.2614	1.14848
16854	0.241034	0.0123781	16854	-10.2657	1.14357
16853	0.241013	0.0123265	16853	-10.2699	1.1388
16852	0.240992	0.012275	16852	-10.2741	1.13417
16851	0.240971	0.0122238	16851	-10.2783	1.12968
16850	0.24095	0.0121728	16850	-10.2826	1.12533
16849	0.240929	0.0121221	16849	-10.2868	1.12111
16848	0.240908	0.0120715	16848	-10.2909	1.11703
16847	0.240887	0.0120211	16847	-10.2951	1.11308
16846	0.240866	0.011971	16846	-10.2993	1.10927
16845	0.240846	0.0119211	16845	-10.3035	1.10558
16844	0.240825	0.0118713	16844	-10.3077	1.10203
16843	0.240805	0.0118218	16843	-10.3118	1.0986
16842	0.240784	0.0117726	16842	-10.316	1.09531
16841	0.240764	0.0117235	16841	-10.3201	1.09213
16840	0.240744	0.0116747	16840	-10.3243	1.08909
16839	0.240724	0.0116261	16839	-10.3284	1.08616
16838	0.240705	0.0115777	16838	-10.3326	1.08336
16837	0.240685	0.0115295	16837	-10.3367	1.08068
16836	0.240666	0.0114815	16836	-10.3408	1.07812
16835	0.240647	0.0114338	16835	-10.3449	1.07567
16834	0.240628	0.0113863	16834	-10.349	1.07335
16833	0.240609	0.011339	16833	-10.3532	1.07113
16832	0.24059	0.0112919	16832	-10.3573	1.06904
16831	0.240572	0.0112451	16831	-10.3614	1.06705
16830	0.240553	0.0111985	16830	-10.3655	1.06518
16829	0.240535	0.0111521	16829	-10.3695	1.06342
16828	0.240517	0.0111059	16828	-10.3736	1.06176
16827	0.2405	0.01106	16827	-10.3777	1.06022
16826	0.240483	0.0110143	16826	-10.3818	1.05878
16825	0.240465	0.0109688	16825	-10.3858	1.05744
16824	0.240449	0.0109235	16824	-10.3899	1.05621
16823	0.240432	0.0108785	16823	-10.394	1.05508
16822	0.240416	0.0108337	16822	-10.398	1.05405
16821	0.2404	0.0107891	16821	-10.4021	1.05313
16820	0.240384	0.0107447	16820	-10.4061	1.0523
16819	0.240368	0.0107006	16819	-10.4102	1.05156
16818	0.240353	0.0106567	16818	-10.4142	1.05092
16817	0.240338	0.010613	16817	-10.4183	1.05038
16816	0.240324	0.0105695	16816	-10.4223	1.04993
16815	0.24031	0.0105262	16815	-10.4263	1.04957
16814	0.240296	0.0104832	16814	-10.4303	1.04931
16813	0.240282	0.0104404	16813	-10.4344	1.04913
16812	0.240269	0.0103978	16812	-10.4384	1.04904
16811	0.240256	0.0103555	16811	-10.4424	1.04904
16810	0.240244	0.0103133	16810	-10.4464	1.04912
16809	0.240231	0.0102714	16809	-10.4504	1.04929
16808	0.24022	0.0102297	16808	-10.4544	1.04954
16807	0.240208	0.0101882	16807	-10.4584	1.04988
16806	0.240197	0.010147	16806	-10.4624	1.0503
16805	0.240186	0.0101059	16805	-10.4664	1.05079
16804	0.240176	0.010065	16804	-10.4704	1.05137
16803	0.240166	0.0100244	16803	-10.4744	1.05202
16802	0.240157	0.00998399	16802	-10.4784	1.05276
16801	0.240148	0.00994378	16801	-10.4824	1.05356
16800	0.240139	0.00990378	16800	-10.4863	1.05445
16799	0.240131	0.00986398	16799	-10.4903	1.0554
16798	0.240124	0.00982439	16798	-10.4943	1.05644
16797	0.240116	0.009785	16797	-10.4983	1.05754
16796	0.24011	0.00974581	16796	-10.5022	1.05871
16795	0.240103	0.00970683	16795	-10.5062	1.05996
16794	0.240097	0.00966804	16794	-10.5102	1.06127
16793	0.240092	0.00962945	16793	-10.5141	1.06265
16792	0.240087	0.00959105	16792	-10.5181	1.06411
16791	0.240083	0.00955285	16791	-10.5221	1.06562
16790	0.240079	0.00951484	16790	-10.526	1.06721
16789	0.240076	0.00947702	16789	-10.53	1.06886
16788	0.240073	0.00943939	16788	-10.5339	1.07057
16787	0.24007	0.00940195	16787	-10.5379	1.07235
16786	0.240069	0.00936469	16786	-10.5418	1.07419
16785	0.240067	0.00932762	16785	-10.5458	1.07609
16784	0.240066	0.00929073	16784	-10.5497	1.07805
16783	0.240066	0.00925402	16783	-10.5537	1.08007
16782	0.240066	0.0092175	16782	-10.5576	1.08215
16781	0.240067	0.00918115	16781	-10.5616	1.08428
16780	0.240068	0.00914499	16780	-10.5655	1.08647
16779	0.24007	0.009109	16779	-10.5695	1.08872
16778	0.240072	0.00907318	16778	-10.5734	1.09102
16777	0.240074	0.00903754	16777	-10.5774	1.09337
16776	0.240077	0.00900208	16776	-10.5813	1.09577
16775	0.240081	0.00896679	16775	-10.5853	1.09823
16774	0.240085	0.00893167	16774	-10.5892	1.10074
16773	0.24009	0.00889672	16773	-10.5932	1.10329
16772	0.240095	0.00886194	16772	-10.5971	1.1059
16771	0.2401	0.00882733	16771	-10.6011	1.10855
16770	0.240107	0.00879288	16770	-10.605	1.11125
16769	0.240113	0.0087586	16769	-10.609	1.11399
16768	0.24012	0.00872449	16768	-10.6129	1.11678
16767	0.240128	0.00869053	16767	-10.6169	1.11962
16766	0.240136	0.00865674	16766	-10.6208	1.12249
16765	0.240144	0.00862312	16765	-10.6248	1.12541
16764	0.240153	0.00858965	16764	-10.6287	1.12837
16763	0.240163	0.00855634	16763	-10.6327	1.13137
16762	0.240173	0.00852319	16762	-10.6366	1.13441
16761	0.240183	0.0084902	16761	-10.6406	1.13749
16760	0.240194	0.00845736	16760	-10.6446	1.14061
16759	0.240206	0.00842467	16759	-10.6485	1.14376
16758	0.240218	0.00839215	16758	-10.6525	1.14695
16757	0.24023	0.00835977	16757	-10.6565	1.15018
16756	0.240243	0.00832754	16756	-10.6604	1.15344
16755	0.240256	0.00829547	16755	-10.6644	1.15674
16754	0.24027	0.00826354	16754	-10.6684	1.16007
16753	0.240284	0.00823176	16753	-10.6724	1.16343
16752	0.240299	0.00820013	16752	-10.6764	1.16683
16751	0.240315	0.00816864	16751	-10.6804	1.17025
16750	0.24033	0.0081373	16750	-10.6843	1.17371
16749	0.240347	0.0081061	16749	-10.6883	1.17719
16748	0.240363	0.00807505	16748	-10.6923	1.18071
16747	0.240381	0.00804414	16747	-10.6963	1.18425
16746	0.240398	0.00801336	16746	-10.7004	1.18782
16745	0.240416	0.00798273	16745	-10.7044	1.19142
16744	0.240435	0.00795223	16744	-10.7084	1.19504
16743	0.240454	0.00792187	16743	-10.7124	1.19869
16742	0.240474	0.00789165	16742	-10.7164	1.20236
16741	0.240494	0.00786156	16741	-10.7205	1.20606
16740	0.240514	0.00783161	16740	-10.7245	1.20978
16739	0.240535	0.00780178	16739	-10.7285	1.21353
16738	0.240557	0.00777209	16738	-10.7326	1.2173
16737	0.240579	0.00774253	16737	-10.7366	1.22109
16736	0.240601	0.0077131	16736	-10.7407	1.2249
16735	0.240624	0.0076838	16735	-10.7447	1.22873
16734	0.240648	0.00765462	16734	-10.7488	1.23258
16733	0.240671	0.00762557	16733	-10.7529	1.23646
16732	0.240696	0.00759665	16732	-10.7569	1.24035
16731	0.24072	0.00756784	16731	-10.761	1.24426
16730	0.240746	0.00753916	16730	-10.7651	1.24818
16729	0.240771	0.00751061	16729	-10.7692	1.25213
16728	0.240798	0.00748217	16728	-10.7733	1.25609
16727	0.240824	0.00745385	16727	-10.7774	1.26007
16726	0.240851	0.00742565	16726	-10.7815	1.26406
16725	0.240879	0.00739757	16725	-10.7856	1.26808
16724	0.240907	0.0073696	16724	-10.7898	1.2721
16723	0.240935	0.00734175	16723	-10.7939	1.27614
16722	0.240964	0.00731401	16722	-10.7981	1.2802
16721	0.240994	0.00728639	16721	-10.8022	1.28426
16720	0.241024	0.00725888	16720	-10.8064	1.28835
16719	0.241054	0.00723148	16719	-10.8105	1.29244
16718	0.241085	0.00720418	16718	-10.8147	1.29655
16717	0.241116	0.007177	16717	-10.8189	1.30067
16716	0.241148	0.00714993	16716	-10.8231	1.3048
16715	0.24118	0.00712296	16715	-10.8273	1.30894
16714	0.241213	0.0070961	16714	-10.8315	1.3131
16713	0.241246	0.00706934	16713	-10.8357	1.31726
16712	0.241279	0.00704269	16712	-10.8399	1.32144
16711	0.241313	0.00701614	16711	-10.8441	1.32563
16710	0.241348	0.0069897	16710	-10.8484	1.32982
16709	0.241383	0.00696336	16709	-10.8526	1.33403
16708	0.241418	0.00693712	16708	-10.8568	1.33825
16707	0.241454	0.00691098	16707	-10.8611	1.34247
16706	0.24149	0.00688495	16706	-10.8654	1.3467
16705	0.241527	0.00685903	16705	-10.8696	1.35094
16704	0.241564	0.00683321	16704	-10.8739	1.35519
16703	0.241601	0.0068075	16703	-10.8781	1.35945
16702	0.241639	0.00678189	16702	-10.8824	1.36371
16701	0.241677	0.00675639	16701	-10.8866	1.36797
16700	0.241716	0.006731	16700	-10.8909	1.37224
16699	0.241755	0.00670572	16699	-10.8951	1.37652
16698	0.241794	0.00668055	16698	-10.8993	1.3808
16697	0.241834	0.00665549	16697	-10.9035	1.38508
16696	0.241874	0.00663054	16696	-10.9077	1.38936
16695	0.241914	0.00660571	16695	-10.9119	1.39365
16694	0.241955	0.00658099	16694	-10.916	1.39794
16693	0.241996	0.00655638	16693	-10.9202	1.40222
16692	0.242037	0.00653188	16692	-10.9243	1.40651
16691	0.242078	0.0065075	16691	-10.9284	1.41079
16690	0.24212	0.00648324	16690	-10.9325	1.41508
16689	0.242163	0.0064591	16689	-10.9365	1.41936
16688	0.242205	0.00643507	16688	-10.9405	1.42363
16687	0.242248	0.00641116	16687	-10.9445	1.4279
16686	0.242291	0.00638738	16686	-10.9485	1.43217
16685	0.242334	0.00636371	16685	-10.9524	1.43643
16684	0.242377	0.00634016	16684	-10.9563	1.44068
16683	0.242421	0.00631674	16683	-10.9602	1.44493
16682	0.242465	0.00629344	16682	-10.964	1.44916
16681	0.242509	0.00627027	16681	-10.9678	1.45339
16680	0.242554	0.00624722	16680	-10.9716	1.45761
16679	0.242598	0.00622429	16679	-10.9753	1.46181
16678	0.242643	0.00620149	16678	-10.979	1.466
16677	0.242688	0.00617882	16677	-10.9826	1.47018
16676	0.242733	0.00615628	16676	-10.9862	1.47434
16675	0.242779	0.00613387	16675	-10.9897	1.47848
16674	0.242824	0.00611158	16674	-10.9932	1.48261
16673	0.24287	0.00608943	16673	-10.9966	1.48673
16672	0.242916	0.0060674	16672	-11	1.49082
16671	0.242961	0.00604551	16671	-11.0033	1.49489
16670	0.243008	0.00602375	16670	-11.0066	1.49895
16669	0.243054	0.00600213	16669	-11.0098	1.50298
16668	0.2431	0.00598063	16668	-11.013	1.50698
16667	0.243147	0.00595927	16667	-11.0161	1.51097
16666	0.243193	0.00593805	16666	-11.0191	1.51492
16665	0.24324	0.00591696	16665	-11.0221	1.51885
16664	0.243286	0.005896	16664	-11.025	1.52276
16663	0.243333	0.00587518	16663	-11.0278	1.52663
16662	0.24338	0.0058545	16662	-11.0306	1.53048
16661	0.243427	0.00583395	16661	-11.0333	1.53429
16660	0.243474	0.00581354	16660	-11.0359	1.53808
16659	0.243521	0.00579327	16659	-11.0385	1.54183
16658	0.243568	0.00577313	16658	-11.041	1.54554
16657	0.243615	0.00575313	16657	-11.0434	1.54922
16656	0.243662	0.00573327	16656	-11.0457	1.55286
16655	0.243709	0.00571355	16655	-11.0479	1.55647
16654	0.243757	0.00569396	16654	-11.0501	1.56004
16653	0.243804	0.00567451	16653	-11.0522	1.56356
16652	0.243851	0.0056552	16652	-11.0542	1.56705
16651	0.243898	0.00563602	16651	-11.0561	1.57049
16650	0.243945	0.00561698	16650	-11.0579	1.57389
16649	0.243992	0.00559808	16649	-11.0597	1.57725
16648	0.244039	0.00557931	16648	-11.0613	1.58056
16647	0.244086	0.00556068	16647	-11.0629	1.58382
16646	0.244133	0.00554219	16646	-11.0644	1.58703
16645	0.24418	0.00552383	16645	-11.0657	1.5902
16644	0.244226	0.0055056	16644	-11.067	1.59331
16643	0.244273	0.00548751	16643	-11.0682	1.59638
16642	0.24432	0.00546956	16642	-11.0692	1.59939
16641	0.244366	0.00545173	16641	-11.0702	1.60235
16640	0.244412	0.00543404	16640	-11.0711	1.60525
16639	0.244459	0.00541648	16639	-11.0718	1.6081
16638	0.244505	0.00539905	16638	-11.0725	1.61089
16637	0.244551	0.00538175	16637	-11.073	1.61362
16636	0.244597	0.00536458	16636	-11.0735	1.6163
16635	0.244642	0.00534754	16635	-11.0738	1.61891
16634	0.244688	0.00533062	16634	-11.074	1.62147
16633	0.244733	0.00531383	16633	-11.0741	1.62396
16632	0.244778	0.00529717	16632	-11.0741	1.62639
16631	0.244823	0.00528063	16631	-11.074	1.62875
16630	0.244868	0.00526421	16630	-11.0737	1.63105
16629	0.244913	0.00524791	16629	-11.0733	1.63329
16628	0.244957	0.00523173	16628	-11.0728	1.63546
16627	0.245001	0.00521567	16627	-11.0722	1.63756
16626	0.245045	0.00519972	16626	-11.0715	1.63959
16625	0.245089	0.00518389	16625	-11.0706	1.64156
16624	0.245133	0.00516818	16624	-11.0696	1.64345
16623	0.245176	0.00515258	16623	-11.0685	1.64528
16622	0.245219	0.00513709	16622	-11.0672	1.64703
16621	0.245262	0.00512171	16621	-11.0658	1.64872
16620	0.245304	0.00510643	16620	-11.0643	1.65034
16619	0.245347	0.00509127	16619	-11.0627	1.65189
16618	0.245389	0.00507621	16618	-11.0609	1.65338
16617	0.24543	0.00506126	16617	-11.059	1.6548
16616	0.245472	0.00504641	16616	-11.0571	1.65616
16615	0.245513	0.00503167	16615	-11.055	1.65745
16614	0.245554	0.00501703	16614	-11.0528	1.65869
16613	0.245595	0.00500249	16613	-11.0505	1.65986
16612	0.245635	0.00498804	16612	-11.0481	1.66098
16611	0.245676	0.0049737	16611	-11.0455	1.66203
16610	0.245715	0.00495946	16610	-11.0429	1.66303
16609	0.245755	0.00494531	16609	-11.0402	1.66397
16608	0.245795	0.00493126	16608	-11.0374	1.66486
16607	0.245834	0.0049173	16607	-11.0345	1.66569
16606	0.245872	0.00490344	16606	-11.0316	1.66647
16605	0.245911	0.00488967	16605	-11.0285	1.66719
16604	0.245949	0.00487599	16604	-11.0253	1.66787
16603	0.245987	0.0048624	16603	-11.0221	1.66849
16602	0.246025	0.0048489	16602	-11.0188	1.66906
16601	0.246062	0.00483549	16601	-11.0154	1.66958
16600	0.246099	0.00482217	16600	-11.012	1.67005
16599	0.246136	0.00480893	16599	-11.0084	1.67048
16598	0.246173	0.00479578	16598	-11.0048	1.67085
16597	0.246209	0.00478271	16597	-11.0011	1.67118
16596	0.246245	0.00476972	16596	-10.9974	1.67147
16595	0.24628	0.00475682	16595	-10.9936	1.67171
16594	0.246316	0.00474399	16594	-10.9898	1.6719
16593	0.246351	0.00473125	16593	-10.9858	1.67205
16592	0.246386	0.00471858	16592	-10.9819	1.67216
16591	0.24642	0.00470599	16591	-10.9779	1.67223
16590	0.246454	0.00469347	16590	-10.9738	1.67225
16589	0.246488	0.00468103	16589	-10.9697	1.67223
16588	0.246521	0.00466867	16588	-10.9655	1.67217
16587	0.246554	0.00465637	16587	-10.9613	1.67207
16586	0.246587	0.00464415	16586	-10.9571	1.67193
16585	0.24662	0.004632	16585	-10.9528	1.67175
16584	0.246652	0.00461991	16584	-10.9485	1.67154
16583	0.246684	0.0046079	16583	-10.9441	1.67128
16582	0.246715	0.00459594	16582	-10.9397	1.67098
16581	0.246747	0.00458406	16581	-10.9353	1.67065
16580	0.246777	0.00457224	16580	-10.9309	1.67028
16579	0.246808	0.00456048	16579	-10.9264	1.66987
16578	0.246838	0.00454878	16578	-10.9219	1.66942
16577	0.246868	0.00453714	16577	-10.9175	1.66894
16576	0.246898	0.00452556	16576	-10.9129	1.66842
16575	0.246927	0.00451403	16575	-10.9084	1.66786
16574	0.246956	0.00450257	16574	-10.9039	1.66727
16573	0.246984	0.00449115	16573	-10.8993	1.66664
16572	0.247012	0.00447979	16572	-10.8948	1.66597
16571	0.24704	0.00446848	16571	-10.8902	1.66527
16570	0.247068	0.00445722	16570	-10.8857	1.66453
16569	0.247095	0.00444601	16569	-10.8811	1.66375
16568	0.247122	0.00443485	16568	-10.8766	1.66294
16567	0.247148	0.00442373	16567	-10.8721	1.66209
16566	0.247174	0.00441266	16566	-10.8675	1.6612
16565	0.2472	0.00440163	16565	-10.863	1.66028
16564	0.247225	0.00439064	16564	-10.8585	1.65932
16563	0.24725	0.00437969	16563	-10.854	1.65832
16562	0.247275	0.00436878	16562	-10.8495	1.65729
16561	0.247299	0.00435791	16561	-10.8451	1.65621
16560	0.247323	0.00434707	16560	-10.8407	1.6551
16559	0.247346	0.00433626	16559	-10.8363	1.65395
16558	0.247369	0.00432549	16558	-10.8319	1.65276
16557	0.247392	0.00431475	16557	-10.8276	1.65154
16556	0.247414	0.00430404	16556	-10.8232	1.65027
16555	0.247436	0.00429336	16555	-10.819	1.64896
16554	0.247458	0.0042827	16554	-10.8147	1.64762
16553	0.247479	0.00427207	16553	-10.8106	1.64623
16552	0.2475	0.00426146	16552	-10.8064	1.6448
16551	0.247521	0.00425087	16551	-10.8023	1.64333
16550	0.247541	0.0042403	16550	-10.7982	1.64182
16549	0.24756	0.00422975	16549	-10.7942	1.64026
16548	0.24758	0.00421921	16548	-10.7903	1.63866
16547	0.247598	0.00420869	16547	-10.7864	1.63702
16546	0.247617	0.00419819	16546	-10.7826	1.63533
16545	0.247635	0.00418769	16545	-10.7788	1.6336
16544	0.247653	0.00417721	16544	-10.7751	1.63182
16543	0.24767	0.00416673	16543	-10.7714	1.63
16542	0.247687	0.00415627	16542	-10.7678	1.62812
16541	0.247703	0.0041458	16541	-10.7643	1.6262
16540	0.247719	0.00413535	16540	-10.7609	1.62423
16539	0.247735	0.00412489	16539	-10.7575	1.62221
16538	0.24775	0.00411443	16538	-10.7542	1.62014
16537	0.247765	0.00410398	16537	-10.751	1.61802
16536	0.24778	0.00409352	16536	-10.7479	1.61585
16535	0.247794	0.00408306	16535	-10.7449	1.61362
16534	0.247807	0.00407259	16534	-10.7419	1.61135
16533	0.24782	0.00406211	16533	-10.7391	1.60901
16532	0.247833	0.00405163	16532	-10.7363	1.60663
16531	0.247845	0.00404114	16531	-10.7336	1.60418
16530	0.247857	0.00403064	16530	-10.731	1.60168
16529	0.247869	0.00402012	16529	-10.7286	1.59913
16528	0.24788	0.00400959	16528	-10.7262	1.59651
16527	0.24789	0.00399905	16527	-10.7239	1.59384
16526	0.2479	0.0039885	16526	-10.7217	1.59112
16525	0.24791	0.00397795	16525	-10.7196	1.58834
16524	0.247919	0.00396738	16524	-10.7176	1.58551
16523	0.247928	0.0039568	16523	-10.7157	1.58263
16522	0.247937	0.00394622	16522	-10.7139	1.5797
16521	0.247945	0.00393564	16521	-10.7121	1.57672
16520	0.247953	0.00392504	16520	-10.7105	1.57368
16519	0.24796	0.00391445	16519	-10.7089	1.57061
16518	0.247967	0.00390385	16518	-10.7074	1.56748
16517	0.247974	0.00389325	16517	-10.706	1.56431
16516	0.24798	0.00388265	16516	-10.7047	1.56109
16515	0.247986	0.00387204	16515	-10.7035	1.55784
16514	0.247992	0.00386144	16514	-10.7023	1.55454
16513	0.247997	0.00385084	16513	-10.7012	1.5512
16512	0.248002	0.00384025	16512	-10.7002	1.54782
16511	0.248006	0.00382966	16511	-10.6993	1.5444
16510	0.24801	0.00381907	16510	-10.6984	1.54094
16509	0.248014	0.00380849	16509	-10.6976	1.53745
16508	0.248018	0.00379792	16508	-10.6968	1.53392
16507	0.248021	0.00378736	16507	-10.6962	1.53036
16506	0.248024	0.00377681	16506	-10.6956	1.52677
16505	0.248026	0.00376627	16505	-10.695	1.52315
16504	0.248029	0.00375574	16504	-10.6945	1.5195
16503	0.248031	0.00374522	16503	-10.6941	1.51582
16502	0.248032	0.00373472	16502	-10.6938	1.51211
16501	0.248034	0.00372423	16501	-10.6934	1.50838
16500	0.248035	0.00371376	16500	-10.6932	1.50462
16499	0.248036	0.0037033	16499	-10.693	1.50084
16498	0.248036	0.00369286	16498	-10.6929	1.49704
16497	0.248036	0.00368245	16497	-10.6928	1.49322
16496	0.248036	0.00367205	16496	-10.6927	1.48937
16495	0.248036	0.00366167	16495	-10.6927	1.48552
16494	0.248036	0.00365132	16494	-10.6928	1.48164
16493	0.248035	0.00364098	16493	-10.6929	1.47775
16492	0.248034	0.00363067	16492	-10.693	1.47385
16491	0.248033	0.00362039	16491	-10.6932	1.46993
16490	0.248031	0.00361013	16490	-10.6934	1.46601
16489	0.248029	0.0035999	16489	-10.6937	1.46207
16488	0.248027	0.00358969	16488	-10.694	1.45812
16487	0.248025	0.00357952	16487	-10.6943	1.45417
16486	0.248023	0.00356937	16486	-10.6947	1.45022
16485	0.24802	0.00355924	16485	-10.6951	1.44625
16484	0.248017	0.00354915	16484	-10.6955	1.44229
16483	0.248014	0.00353909	16483	-10.696	1.43832
16482	0.248011	0.00352907	16482	-10.6965	1.43436
16481	0.248008	0.00351907	16481	-10.697	1.43039
16480	0.248004	0.0035091	16480	-10.6976	1.42643
16479	0.248	0.00349917	16479	-10.6981	1.42247
16478	0.247996	0.00348927	16478	-10.6987	1.41851
16477	0.247992	0.0034794	16477	-10.6993	1.41456
16476	0.247988	0.00346957	16476	-10.7	1.41062
16475	0.247984	0.00345977	16475	-10.7006	1.40668
16474	0.247979	0.00345	16474	-10.7013	1.40276
16473	0.247974	0.00344028	16473	-10.702	1.39884
16472	0.247969	0.00343058	16472	-10.7027	1.39494
16471	0.247964	0.00342092	16471	-10.7034	1.39105
16470	0.247959	0.0034113	16470	-10.7041	1.38717
16469	0.247954	0.00340171	16469	-10.7048	1.38331
16468	0.247948	0.00339216	16468	-10.7055	1.37947
16467	0.247943	0.00338264	16467	-10.7063	1.37564
16466	0.247937	0.00337316	16466	-10.707	1.37183
16465	0.247931	0.00336372	16465	-10.7078	1.36804
16464	0.247925	0.00335431	16464	-10.7085	1.36427
16463	0.247919	0.00334493	16463	-10.7092	1.36053
16462	0.247913	0.0033356	16462	-10.71	1.3568
16461	0.247907	0.00332629	16461	-10.7107	1.3531
16460	0.247901	0.00331703	16460	-10.7115	1.34943
16459	0.247894	0.00330779	16459	-10.7122	1.34577
16458	0.247888	0.0032986	16458	-10.7129	1.34215
16457	0.247881	0.00328943	16457	-10.7136	1.33855
16456	0.247875	0.0032803	16456	-10.7143	1.33498
16455	0.247868	0.00327121	16455	-10.715	1.33144
16454	0.247861	0.00326215	16454	-10.7157	1.32793
16453	0.247854	0.00325312	16453	-10.7163	1.32445
16452	0.247848	0.00324412	16452	-10.717	1.321
16451	0.247841	0.00323515	16451	-10.7176	1.31759
16450	0.247834	0.00322622	16450	-10.7182	1.3142
16449	0.247827	0.00321732	16449	-10.7188	1.31085
16448	0.24782	0.00320845	16448	-10.7193	1.30753
16447	0.247813	0.00319961	16447	-10.7199	1.30425
16446	0.247806	0.0031908	16446	-10.7204	1.301
16445	0.247799	0.00318201	16445	-10.7209	1.29779
16444	0.247792	0.00317326	16444	-10.7213	1.29461
16443	0.247785	0.00316454	16443	-10.7218	1.29146
16442	0.247778	0.00315585	16442	-10.7222	1.28835
16441	0.24777	0.00314719	16441	-10.7225	1.28527
16440	0.247763	0.00313856	16440	-10.7229	1.28222
16439	0.247756	0.00312997	16439	-10.7232	1.27921
16438	0.247749	0.0031214	16438	-10.7235	1.27623
16437	0.247742	0.00311287	16437	-10.7237	1.27329
16436	0.247734	0.00310437	16436	-10.7239	1.27037
16435	0.247727	0.0030959	16435	-10.7241	1.26749
16434	0.247719	0.00308746	16434	-10.7243	1.26464
16433	0.247712	0.00307906	16433	-10.7244	1.26183
16432	0.247705	0.00307069	16432	-10.7245	1.25904
16431	0.247697	0.00306235	16431	-10.7246	1.25628
16430	0.24769	0.00305405	16430	-10.7246	1.25356
16429	0.247682	0.00304579	16429	-10.7246	1.25087
16428	0.247674	0.00303756	16428	-10.7245	1.2482
16427	0.247667	0.00302936	16427	-10.7244	1.24557
16426	0.247659	0.0030212	16426	-10.7243	1.24297
16425	0.247651	0.00301308	16425	-10.7241	1.24039
16424	0.247644	0.003005	16424	-10.7239	1.23784
16423	0.247636	0.00299695	16423	-10.7237	1.23533
16422	0.247628	0.00298895	16422	-10.7234	1.23284
16421	0.24762	0.00298098	16421	-10.7231	1.23037
16420	0.247612	0.00297306	16420	-10.7227	1.22794
16419	0.247604	0.00296517	16419	-10.7223	1.22553
16418	0.247596	0.00295732	16418	-10.7219	1.22314
16417	0.247588	0.00294952	16417	-10.7214	1.22079
16416	0.24758	0.00294176	16416	-10.7209	1.21845
16415	0.247572	0.00293404	16415	-10.7203	1.21614
16414	0.247563	0.00292636	16414	-10.7197	1.21386
16413	0.247555	0.00291873	16413	-10.719	1.2116
16412	0.247547	0.00291114	16412	-10.7183	1.20936
16411	0.247538	0.0029036	16411	-10.7175	1.20714
16410	0.24753	0.00289611	16410	-10.7167	1.20494
16409	0.247521	0.00288866	16409	-10.7159	1.20277
16408	0.247513	0.00288126	16408	-10.7149	1.20061
16407	0.247504	0.0028739	16407	-10.714	1.19848
16406	0.247495	0.00286659	16406	-10.713	1.19636
16405	0.247487	0.00285933	16405	-10.7119	1.19427
16404	0.247478	0.00285213	16404	-10.7108	1.19219
16403	0.247469	0.00284497	16403	-10.7097	1.19012
16402	0.24746	0.00283786	16402	-10.7085	1.18808
16401	0.247451	0.0028308	16401	-10.7072	1.18604
16400	0.247442	0.00282379	16400	-10.7059	1.18403
16399	0.247433	0.00281683	16399	-10.7045	1.18202
16398	0.247424	0.00280993	16398	-10.7031	1.18003
16397	0.247414	0.00280308	16397	-10.7016	1.17806
16396	0.247405	0.00279628	16396	-10.7001	1.17609
16395	0.247396	0.00278954	16395	-10.6985	1.17414
16394	0.247386	0.00278285	16394	-10.6968	1.17219
16393	0.247377	0.00277621	16393	-10.6951	1.17025
16392	0.247367	0.00276963	16392	-10.6934	1.16833
16391	0.247357	0.0027631	16391	-10.6916	1.16641
16390	0.247348	0.00275663	16390	-10.6897	1.16449
16389	0.247338	0.00275022	16389	-10.6877	1.16259
16388	0.247328	0.00274386	16388	-10.6857	1.16068
16387	0.247318	0.00273756	16387	-10.6837	1.15879
16386	0.247308	0.00273132	16386	-10.6815	1.15689
16385	0.247298	0.00272513	16385	-10.6793	1.155
16384	0.247287	0.002719	16384	-10.6771	1.15311
16383	0.247277	0.00271293	16383	-10.6748	1.15122
16382	0.247267	0.00270692	16382	-10.6724	1.14933
16381	0.247256	0.00270096	16381	-10.6699	1.14743
16380	0.247246	0.00269507	16380	-10.6674	1.14554
16379	0.247235	0.00268923	16379	-10.6649	1.14364
16378	0.247224	0.00268345	16378	-10.6622	1.14174
16377	0.247214	0.00267773	16377	-10.6595	1.13983
16376	0.247203	0.00267207	16376	-10.6567	1.13792
16375	0.247192	0.00266647	16375	-10.6539	1.136
16374	0.247181	0.00266093	16374	-10.6509	1.13407
16373	0.24717	0.00265545	16373	-10.648	1.13214
16372	0.247158	0.00265003	16372	-10.6449	1.13019
16371	0.247147	0.00264466	16371	-10.6418	1.12824
16370	0.247136	0.00263936	16370	-10.6386	1.12627
16369	0.247124	0.00263412	16369	-10.6353	1.12429
16368	0.247113	0.00262894	16368	-10.6319	1.1223
16367	0.247101	0.00262382	16367	-10.6285	1.12029
16366	0.247089	0.00261876	16366	-10.625	1.11827
16365	0.247077	0.00261376	16365	-10.6215	1.11623
16364	0.247065	0.00260882	16364	-10.6178	1.11417
16363	0.247053	0.00260394	16363	-10.6141	1.1121
16362	0.247041	0.00259912	16362	-10.6103	1.11001
16361	0.247029	0.00259436	16361	-10.6064	1.10789
16360	0.247016	0.00258966	16360	-10.6025	1.10576
16359	0.247004	0.00258502	16359	-10.5984	1.10361
16358	0.246991	0.00258044	16358	-10.5943	1.10143
16357	0.246979	0.00257593	16357	-10.5901	1.09923
16356	0.246966	0.00257147	16356	-10.5859	1.09701
16355	0.246953	0.00256707	16355	-10.5815	1.09477
16354	0.24694	0.00256274	16354	-10.5771	1.0925
16353	0.246927	0.00255847	16353	-10.5726	1.09022
16352	0.246914	0.00255425	16352	-10.5681	1.08791
16351	0.246901	0.0025501	16351	-10.5635	1.08558
16350	0.246888	0.00254601	16350	-10.5588	1.08323
16349	0.246874	0.00254199	16349	-10.554	1.08087
16348	0.246861	0.00253802	16348	-10.5492	1.07848
16347	0.246848	0.00253411	16347	-10.5443	1.07607
16346	0.246834	0.00253027	16346	-10.5394	1.07364
16345	0.24682	0.00252649	16345	-10.5344	1.07119
16344	0.246807	0.00252278	16344	-10.5294	1.06873
16343	0.246793	0.00251912	16343	-10.5243	1.06624
16342	0.246779	0.00251553	16342	-10.5191	1.06374
16341	0.246765	0.002512	16341	-10.5139	1.06122
16340	0.246752	0.00250854	16340	-10.5087	1.05869
16339	0.246738	0.00250513	16339	-10.5034	1.05614
16338	0.246724	0.0025018	16338	-10.4981	1.05357
16337	0.24671	0.00249852	16337	-10.4927	1.05099
16336	0.246696	0.00249531	16336	-10.4873	1.04839
16335	0.246682	0.00249217	16335	-10.4818	1.04577
16334	0.246667	0.00248909	16334	-10.4763	1.04315
16333	0.246653	0.00248607	16333	-10.4708	1.04051
16332	0.246639	0.00248312	16332	-10.4652	1.03785
16331	0.246625	0.00248023	16331	-10.4596	1.03519
16330	0.246611	0.00247741	16330	-10.4539	1.03251
16329	0.246597	0.00247466	16329	-10.4483	1.02982
16328	0.246582	0.00247196	16328	-10.4426	1.02712
16327	0.246568	0.00246934	16327	-10.4368	1.02441
16326	0.246554	0.00246678	16326	-10.4311	1.02168
16325	0.24654	0.00246429	16325	-10.4253	1.01895
16324	0.246525	0.00246186	16324	-10.4195	1.01622
16323	0.246511	0.00245949	16323	-10.4137	1.01347
16322	0.246497	0.0024572	16322	-10.4079	1.01071
16321	0.246483	0.00245497	16321	-10.402	1.00795
16320	0.246469	0.0024528	16320	-10.3962	1.00518
16319	0.246454	0.0024507	16319	-10.3903	1.00241
16318	0.24644	0.00244867	16318	-10.3844	0.99963
16317	0.246426	0.0024467	16317	-10.3785	0.996846
16316	0.246412	0.0024448	16316	-10.3726	0.994057
16315	0.246398	0.00244297	16315	-10.3667	0.991265
16314	0.246384	0.0024412	16314	-10.3608	0.98847
16313	0.24637	0.0024395	16313	-10.3548	0.985672
16312	0.246356	0.00243786	16312	-10.3489	0.982872
16311	0.246342	0.00243629	16311	-10.343	0.980071
16310	0.246328	0.00243478	16310	-10.3371	0.977269
16309	0.246314	0.00243334	16309	-10.3312	0.974467
16308	0.2463	0.00243196	16308	-10.3253	0.971666
16307	0.246286	0.00243065	16307	-10.3194	0.968865
16306	0.246272	0.0024294	16306	-10.3135	0.966065
16305	0.246259	0.00242822	16305	-10.3076	0.963267
16304	0.246245	0.0024271	16304	-10.3017	0.960472
16303	0.246232	0.00242604	16303	-10.2959	0.95768
16302	0.246218	0.00242505	16302	-10.29	0.954891
16301	0.246205	0.00242413	16301	-10.2842	0.952106
16300	0.246191	0.00242326	16300	-10.2784	0.949326
16299	0.246178	0.00242246	16299	-10.2726	0.946551
16298	0.246165	0.00242172	16298	-10.2668	0.943781
16297	0.246152	0.00242104	16297	-10.2611	0.941017
16296	0.246139	0.00242042	16296	-10.2554	0.93826
16295	0.246126	0.00241987	16295	-10.2497	0.93551
16294	0.246113	0.00241938	16294	-10.2441	0.932767
16293	0.2461	0.00241894	16293	-10.2384	0.930031
16292	0.246087	0.00241857	16292	-10.2329	0.927304
16291	0.246075	0.00241826	16291	-10.2273	0.924586
16290	0.246062	0.002418	16290	-10.2218	0.921877
16289	0.24605	0.00241781	16289	-10.2163	0.919177
16288	0.246037	0.00241767	16288	-10.2109	0.916487
16287	0.246025	0.00241759	16287	-10.2055	0.913807
16286	0.246013	0.00241757	16286	-10.2001	0.911138
16285	0.246001	0.00241761	16285	-10.1948	0.90848
16284	0.245989	0.0024177	16284	-10.1895	0.905833
16283	0.245978	0.00241785	16283	-10.1843	0.903198
16282	0.245966	0.00241805	16282	-10.1791	0.900575
16281	0.245955	0.00241831	16281	-10.174	0.897963
16280	0.245943	0.00241863	16280	-10.169	0.895365
16279	0.245932	0.00241899	16279	-10.164	0.892779
16278	0.245921	0.00241941	16278	-10.159	0.890206
16277	0.24591	0.00241989	16277	-10.1541	0.887647
16276	0.245899	0.00242042	16276	-10.1493	0.885101
16275	0.245889	0.002421	16275	-10.1445	0.882569
16274	0.245878	0.00242163	16274	-10.1398	0.88005
16273	0.245868	0.00242231	16273	-10.1351	0.877546
16272	0.245858	0.00242304	16272	-10.1306	0.875056
16271	0.245848	0.00242382	16271	-10.1261	0.87258
16270	0.245838	0.00242465	16270	-10.1216	0.870119
16269	0.245828	0.00242554	16269	-10.1172	0.867673
16268	0.245818	0.00242647	16268	-10.113	0.865241
16267	0.245809	0.00242745	16267	-10.1087	0.862824
16266	0.2458	0.00242847	16266	-10.1046	0.860423
16265	0.245791	0.00242955	16265	-10.1005	0.858036
16264	0.245782	0.00243067	16264	-10.0965	0.855664
16263	0.245773	0.00243184	16263	-10.0926	0.853307
16262	0.245765	0.00243305	16262	-10.0888	0.850966
16261	0.245756	0.00243431	16261	-10.0851	0.848639
16260	0.245748	0.00243562	16260	-10.0814	0.846328
16259	0.24574	0.00243698	16259	-10.0779	0.844031
16258	0.245732	0.00243838	16258	-10.0744	0.84175
16257	0.245725	0.00243982	16257	-10.071	0.839484
16256	0.245718	0.00244131	16256	-10.0678	0.837232
16255	0.24571	0.00244284	16255	-10.0646	0.834995
16254	0.245703	0.00244442	16254	-10.0615	0.832773
16253	0.245697	0.00244604	16253	-10.0585	0.830565
16252	0.24569	0.00244771	16252	-10.0556	0.828372
16251	0.245684	0.00244943	16251	-10.0528	0.826193
16250	0.245678	0.00245118	16250	-10.0501	0.824028
16249	0.245672	0.00245299	16249	-10.0475	0.821877
16248	0.245666	0.00245483	16248	-10.0451	0.81974
16247	0.245661	0.00245672	16247	-10.0427	0.817617
16246	0.245656	0.00245866	16246	-10.0405	0.815507
16245	0.245651	0.00246065	16245	-10.0383	0.81341
16244	0.245646	0.00246268	16244	-10.0363	0.811326
16243	0.245641	0.00246475	16243	-10.0344	0.809256
16242	0.245637	0.00246689	16242	-10.0326	0.807199
16241	0.245633	0.00246907	16241	-10.0309	0.805155
16240	0.245629	0.00247131	16240	-10.0293	0.803125
16239	0.245626	0.00247361	16239	-10.0279	0.801108
16238	0.245622	0.00247597	16238	-10.0265	0.799105
16237	0.245619	0.00247839	16237	-10.0253	0.797115
16236	0.245616	0.00248088	16236	-10.0242	0.79514
16235	0.245613	0.00248343	16235	-10.0232	0.793178
16234	0.245611	0.00248606	16234	-10.0223	0.79123
16233	0.245608	0.00248875	16233	-10.0215	0.789296
16232	0.245606	0.00249151	16232	-10.0209	0.787376
16231	0.245604	0.00249436	16231	-10.0203	0.785471
16230	0.245603	0.00249728	16230	-10.0199	0.783581
16229	0.245601	0.00250027	16229	-10.0196	0.781705
16228	0.2456	0.00250336	16228	-10.0194	0.779843
16227	0.245598	0.00250652	16227	-10.0193	0.777997
16226	0.245597	0.00250977	16226	-10.0194	0.776166
16225	0.245597	0.00251311	16225	-10.0196	0.774351
16224	0.245596	0.00251653	16224	-10.0198	0.772551
16223	0.245595	0.00252006	16223	-10.0202	0.770767
16222	0.245595	0.00252367	16222	-10.0208	0.768998
16221	0.245595	0.00252738	16221	-10.0214	0.767246
16220	0.245595	0.00253119	16220	-10.0222	0.765511
16219	0.245595	0.00253509	16219	-10.023	0.763791
16218	0.245596	0.0025391	16218	-10.024	0.762089
16217	0.245596	0.00254321	16217	-10.0252	0.760404
16216	0.245597	0.00254743	16216	-10.0264	0.758736
16215	0.245598	0.00255175	16215	-10.0278	0.757085
16214	0.245599	0.00255618	16214	-10.0293	0.755453
16213	0.2456	0.00256072	16213	-10.0309	0.753838
16212	0.245601	0.00256537	16212	-10.0326	0.752242
16211	0.245603	0.00257014	16211	-10.0344	0.750664
16210	0.245604	0.00257502	16210	-10.0364	0.749105
16209	0.245606	0.00258001	16209	-10.0385	0.747565
16208	0.245608	0.00258513	16208	-10.0407	0.746044
16207	0.24561	0.00259036	16207	-10.043	0.744543
16206	0.245612	0.00259571	16206	-10.0455	0.743062
16205	0.245614	0.00260119	16205	-10.0481	0.741601
16204	0.245617	0.00260678	16204	-10.0508	0.740161
16203	0.245619	0.0026125	16203	-10.0536	0.738741
16202	0.245622	0.00261834	16202	-10.0566	0.737343
16201	0.245625	0.00262432	16201	-10.0597	0.735966
16200	0.245628	0.00263041	16200	-10.0629	0.73461
16199	0.245631	0.00263664	16199	-10.0662	0.733277
16198	0.245634	0.00264299	16198	-10.0696	0.731966
16197	0.245637	0.00264948	16197	-10.0732	0.730678
16196	0.245641	0.00265609	16196	-10.0769	0.729412
16195	0.245644	0.00266283	16195	-10.0808	0.72817
16194	0.245648	0.0026697	16194	-10.0847	0.726951
16193	0.245652	0.00267669	16193	-10.0888	0.725756
16192	0.245655	0.00268381	16192	-10.093	0.724585
16191	0.245659	0.00269105	16191	-10.0973	0.723438
16190	0.245663	0.00269841	16190	-10.1018	0.722315
16189	0.245667	0.00270589	16189	-10.1064	0.721217
16188	0.245672	0.00271349	16188	-10.1111	0.720143
16187	0.245676	0.00272121	16187	-10.1159	0.719095
16186	0.24568	0.00272904	16186	-10.1208	0.718073
16185	0.245685	0.00273699	16185	-10.1259	0.717077
16184	0.245689	0.00274504	16184	-10.1311	0.716106
16183	0.245694	0.00275321	16183	-10.1364	0.715163
16182	0.245699	0.00276149	16182	-10.1418	0.714246
16181	0.245704	0.00276988	16181	-10.1473	0.713356
16180	0.245708	0.00277837	16180	-10.153	0.712494
16179	0.245713	0.00278696	16179	-10.1588	0.71166
16178	0.245718	0.00279565	16178	-10.1647	0.710854
16177	0.245724	0.00280445	16177	-10.1707	0.710076
16176	0.245729	0.00281333	16176	-10.1768	0.709327
16175	0.245734	0.00282232	16175	-10.1831	0.708608
16174	0.245739	0.0028314	16174	-10.1894	0.707919
16173	0.245745	0.00284056	16173	-10.1959	0.707259
16172	0.24575	0.00284982	16172	-10.2025	0.70663
16171	0.245756	0.00285916	16171	-10.2093	0.706032
16170	0.245761	0.00286858	16170	-10.2161	0.705465
16169	0.245767	0.00287808	16169	-10.223	0.704929
16168	0.245773	0.00288767	16168	-10.2301	0.704425
16167	0.245779	0.00289733	16167	-10.2373	0.703954
16166	0.245784	0.00290706	16166	-10.2446	0.703515
16165	0.24579	0.00291686	16165	-10.252	0.70311
16164	0.245796	0.00292673	16164	-10.2595	0.702737
16163	0.245802	0.00293667	16163	-10.2672	0.702399
16162	0.245808	0.00294667	16162	-10.2749	0.702095
16161	0.245814	0.00295673	16161	-10.2828	0.701825
16160	0.24582	0.00296685	16160	-10.2907	0.701591
16159	0.245827	0.00297703	16159	-10.2988	0.701391
16158	0.245833	0.00298726	16158	-10.307	0.701228
16157	0.245839	0.00299753	16157	-10.3153	0.7011
16156	0.245845	0.00300786	16156	-10.3238	0.701009
16155	0.245852	0.00301823	16155	-10.3323	0.700955
16154	0.245858	0.00302864	16154	-10.3409	0.700938
16153	0.245864	0.00303909	16153	-10.3497	0.700958
16152	0.245871	0.00304958	16152	-10.3585	0.701017
16151	0.245877	0.0030601	16151	-10.3675	0.701113
16150	0.245884	0.00307065	16150	-10.3766	0.701248
16149	0.24589	0.00308123	16149	-10.3857	0.701422
16148	0.245896	0.00309184	16148	-10.395	0.701636
16147	0.245903	0.00310247	16147	-10.4044	0.701888
16146	0.245909	0.00311311	16146	-10.4139	0.702181
16145	0.245916	0.00312378	16145	-10.4236	0.702514
16144	0.245923	0.00313445	16144	-10.4333	0.702888
16143	0.245929	0.00314514	16143	-10.4431	0.703302
16142	0.245936	0.00315584	16142	-10.453	0.703757
16141	0.245942	0.00316655	16141	-10.4631	0.704254
16140	0.245949	0.00317725	16140	-10.4732	0.704793
16139	0.245955	0.00318796	16139	-10.4834	0.705374
16138	0.245962	0.00319866	16138	-10.4938	0.705996
16137	0.245969	0.00320936	16137	-10.5042	0.706662
16136	0.245975	0.00322005	16136	-10.5148	0.70737
16135	0.245982	0.00323073	16135	-10.5254	0.708121
16134	0.245988	0.00324139	16134	-10.5362	0.708916
16133	0.245995	0.00325204	16133	-10.5471	0.709754
16132	0.246001	0.00326267	16132	-10.558	0.710636
16131	0.246008	0.00327328	16131	-10.5691	0.711562
16130	0.246014	0.00328387	16130	-10.5802	0.712532
16129	0.246021	0.00329443	16129	-10.5915	0.713546
16128	0.246027	0.00330495	16128	-10.6029	0.714605
16127	0.246034	0.00331545	16127	-10.6143	0.715709
16126	0.24604	0.00332591	16126	-10.6259	0.716858
16125	0.246047	0.00333634	16125	-10.6376	0.718052
16124	0.246053	0.00334672	16124	-10.6493	0.719291
16123	0.246059	0.00335706	16123	-10.6612	0.720575
16122	0.246066	0.00336736	16122	-10.6732	0.721906
16121	0.246072	0.00337761	16121	-10.6852	0.723282
16120	0.246078	0.00338781	16120	-10.6974	0.724704
16119	0.246085	0.00339796	16119	-10.7096	0.726172
16118	0.246091	0.00340806	16118	-10.722	0.727686
16117	0.246097	0.0034181	16117	-10.7344	0.729246
16116	0.246103	0.00342808	16116	-10.747	0.730853
16115	0.246109	0.003438	16115	-10.7596	0.732506
16114	0.246115	0.00344786	16114	-10.7723	0.734206
16113	0.246121	0.00345765	16113	-10.7851	0.735952
16112	0.246127	0.00346738	16112	-10.7981	0.737745
16111	0.246133	0.00347703	16111	-10.8111	0.739585
16110	0.246139	0.00348662	16110	-10.8242	0.741472
16109	0.246145	0.00349613	16109	-10.8374	0.743405
16108	0.24615	0.00350556	16108	-10.8507	0.745386
16107	0.246156	0.00351492	16107	-10.8641	0.747414
16106	0.246162	0.00352421	16106	-10.8775	0.749488
16105	0.246167	0.00353341	16105	-10.8911	0.75161
16104	0.246173	0.00354253	16104	-10.9048	0.753779
16103	0.246178	0.00355156	16103	-10.9185	0.755995
16102	0.246184	0.00356051	16102	-10.9324	0.758258
16101	0.246189	0.00356937	16101	-10.9463	0.760569
16100	0.246194	0.00357815	16100	-10.9603	0.762927
16099	0.246199	0.00358683	16099	-10.9744	0.765332
16098	0.246204	0.00359543	16098	-10.9886	0.767784
16097	0.246209	0.00360393	16097	-11.0029	0.770283
16096	0.246214	0.00361233	16096	-11.0173	0.77283
16095	0.246219	0.00362065	16095	-11.0318	0.775424
16094	0.246224	0.00362887	16094	-11.0463	0.778065
16093	0.246229	0.00363699	16093	-11.061	0.780752
16092	0.246233	0.00364502	16092	-11.0757	0.783485
16091	0.246238	0.00365296	16091	-11.0905	0.786264
16090	0.246242	0.00366081	16090	-11.1054	0.789088
16089	0.246247	0.00366856	16089	-11.1204	0.791957
16088	0.246251	0.00367622	16088	-11.1355	0.79487
16087	0.246256	0.00368379	16087	-11.1507	0.797827
16086	0.24626	0.00369127	16086	-11.1659	0.800827
16085	0.246265	0.00369866	16085	-11.1813	0.803871
16084	0.246269	0.00370595	16084	-11.1967	0.806956
16083	0.246273	0.00371316	16083	-11.2122	0.810084
16082	0.246278	0.00372027	16082	-11.2278	0.813253
16081	0.246282	0.00372729	16081	-11.2434	0.816462
16080	0.246287	0.00373422	16080	-11.2592	0.819713
16079	0.246291	0.00374106	16079	-11.275	0.823003
16078	0.246296	0.0037478	16078	-11.2909	0.826333
16077	0.2463	0.00375445	16077	-11.3069	0.829701
16076	0.246305	0.00376101	16076	-11.323	0.833108
16075	0.246309	0.00376748	16075	-11.3392	0.836553
16074	0.246314	0.00377385	16074	-11.3554	0.840035
16073	0.246319	0.00378013	16073	-11.3718	0.843554
16072	0.246323	0.00378631	16072	-11.3882	0.847109
16071	0.246328	0.00379239	16071	-11.4047	0.850699
16070	0.246333	0.00379838	16070	-11.4212	0.854325
16069	0.246338	0.00380427	16069	-11.4379	0.857986
16068	0.246343	0.00381006	16068	-11.4546	0.86168
16067	0.246349	0.00381575	16067	-11.4714	0.865408
16066	0.246354	0.00382134	16066	-11.4883	0.869169
16065	0.24636	0.00382683	16065	-11.5053	0.872962
16064	0.246365	0.00383221	16064	-11.5223	0.876788
16063	0.246371	0.00383749	16063	-11.5395	0.880644
16062	0.246377	0.00384267	16062	-11.5567	0.884531
16061	0.246383	0.00384774	16061	-11.5739	0.888449
16060	0.246389	0.0038527	16060	-11.5913	0.892396
16059	0.246395	0.00385754	16059	-11.6087	0.896372
16058	0.246402	0.00386228	16058	-11.6262	0.900376
16057	0.246408	0.0038669	16057	-11.6438	0.904409
16056	0.246415	0.00387141	16056	-11.6615	0.908469
16055	0.246422	0.00387581	16055	-11.6792	0.912555
16054	0.246429	0.00388008	16054	-11.6971	0.916669
16053	0.246437	0.00388424	16053	-11.7149	0.920808
16052	0.246444	0.00388827	16052	-11.7329	0.924972
16051	0.246452	0.00389217	16051	-11.7509	0.929161
16050	0.24646	0.00389596	16050	-11.7691	0.933374
16049	0.246468	0.00389961	16049	-11.7872	0.93761
16048	0.246477	0.00390314	16048	-11.8055	0.94187
16047	0.246486	0.00390653	16047	-11.8238	0.946153
16046	0.246494	0.00390979	16046	-11.8423	0.950457
16045	0.246504	0.00391291	16045	-11.8607	0.954783
16044	0.246513	0.0039159	16044	-11.8793	0.959131
16043	0.246523	0.00391874	16043	-11.8979	0.963498
16042	0.246533	0.00392144	16042	-11.9166	0.967886
16041	0.246543	0.003924	16041	-11.9354	0.972294
16040	0.246553	0.00392641	16040	-11.9542	0.97672
16039	0.246564	0.00392867	16039	-11.9731	0.981165
16038	0.246575	0.00393078	16038	-11.9921	0.985628
16037	0.246587	0.00393274	16037	-12.0112	0.990109
16036	0.246598	0.00393454	16036	-12.0303	0.994607
16035	0.24661	0.00393618	16035	-12.0495	0.999122
16034	0.246623	0.00393766	16034	-12.0687	1.00365
16033	0.246635	0.00393897	16033	-12.0881	1.0082
16032	0.246648	0.00394013	16032	-12.1075	1.01276
16031	0.246662	0.00394111	16031	-12.1269	1.01734
16030	0.246675	0.00394192	16030	-12.1465	1.02193
16029	0.246689	0.00394257	16029	-12.1661	1.02654
16028	0.246704	0.00394304	16028	-12.1857	1.03116
16027	0.246718	0.00394333	16027	-12.2055	1.03579
16026	0.246734	0.00394346	16026	-12.2253	1.04044
16025	0.246749	0.00394343	16025	-12.2451	1.04509
16024	0.246765	0.00394323	16024	-12.2651	1.04976
16023	0.246781	0.00394287	16023	-12.2851	1.05443
16022	0.246797	0.00394235	16022	-12.3052	1.05912
16021	0.246814	0.00394169	16021	-12.3254	1.06381
16020	0.246831	0.00394087	16020	-12.3456	1.06851
16019	0.246849	0.0039399	16019	-12.3659	1.07321
16018	0.246866	0.0039388	16018	-12.3863	1.07792
16017	0.246884	0.00393755	16017	-12.4068	1.08263
16016	0.246903	0.00393617	16016	-12.4273	1.08734
16015	0.246921	0.00393466	16015	-12.4479	1.09206
16014	0.24694	0.00393302	16014	-12.4686	1.09677
16013	0.24696	0.00393126	16013	-12.4894	1.10149
16012	0.246979	0.00392937	16012	-12.5103	1.1062
16011	0.246999	0.00392737	16011	-12.5312	1.11091
16010	0.247019	0.00392525	16010	-12.5522	1.11562
16009	0.247039	0.00392303	16009	-12.5733	1.12032
16008	0.24706	0.0039207	16008	-12.5945	1.12502
16007	0.247081	0.00391827	16007	-12.6158	1.12971
16006	0.247102	0.00391574	16006	-12.6371	1.13439
16005	0.247124	0.00391312	16005	-12.6586	1.13906
16004	0.247146	0.00391041	16004	-12.6801	1.14372
16003	0.247168	0.00390762	16003	-12.7017	1.14837
16002	0.24719	0.00390474	16002	-12.7234	1.15301
16001	0.247212	0.00390179	16001	-12.7452	1.15763
16000	0.247235	0.00389877	16000	-12.7671	1.16224
15999	0.247258	0.00389568	15999	-12.789	1.16683
15998	0.247281	0.00389253	15998	-12.8111	1.17141
15997	0.247305	0.00388932	15997	-12.8333	1.17596
15996	0.247329	0.00388605	15996	-12.8555	1.1805
15995	0.247352	0.00388274	15995	-12.8778	1.18501
15994	0.247377	0.00387937	15994	-12.9003	1.18951
15993	0.247401	0.00387597	15993	-12.9228	1.19398
15992	0.247426	0.00387253	15992	-12.9454	1.19842
15991	0.24745	0.00386906	15991	-12.9681	1.20284
15990	0.247475	0.00386556	15990	-12.991	1.20724
15989	0.247501	0.00386204	15989	-13.0139	1.2116
15988	0.247526	0.0038585	15988	-13.0369	1.21594
15987	0.247552	0.00385494	15987	-13.06	1.22024
15986	0.247577	0.00385138	15986	-13.0832	1.22452
15985	0.247603	0.00384781	15985	-13.1065	1.22876
15984	0.247629	0.00384424	15984	-13.13	1.23296
15983	0.247656	0.00384068	15983	-13.1535	1.23713
15982	0.247682	0.00383713	15982	-13.1771	1.24127
15981	0.247709	0.00383359	15981	-13.2009	1.24536
15980	0.247736	0.00383007	15980	-13.2247	1.24942
15979	0.247763	0.00382657	15979	-13.2486	1.25344
15978	0.24779	0.0038231	15978	-13.2727	1.25741
15977	0.247817	0.00381966	15977	-13.2968	1.26134
15976	0.247845	0.00381626	15976	-13.3211	1.26523
15975	0.247872	0.00381291	15975	-13.3455	1.26907
15974	0.2479	0.00380959	15974	-13.37	1.27287
15973	0.247928	0.00380634	15973	-13.3946	1.27662
15972	0.247956	0.00380313	15972	-13.4193	1.28032
15971	0.247984	0.00379999	15971	-13.4441	1.28397
15970	0.248012	0.00379692	15970	-13.469	1.28757
15969	0.24804	0.00379391	15969	-13.4941	1.29111
15968	0.248069	0.00379098	15968	-13.5193	1.2946
15967	0.248097	0.00378813	15967	-13.5445	1.29804
15966	0.248126	0.00378537	15966	-13.5699	1.30142
15965	0.248155	0.00378269	15965	-13.5955	1.30475
15964	0.248184	0.00378011	15964	-13.6211	1.30801
15963	0.248213	0.00377762	15963	-13.6468	1.31122
15962	0.248242	0.00377524	15962	-13.6727	1.31436
15961	0.248271	0.00377296	15961	-13.6987	1.31745
15960	0.2483	0.0037708	15960	-13.7248	1.32047
15959	0.24833	0.00376875	15959	-13.7511	1.32342
15958	0.248359	0.00376683	15958	-13.7774	1.32632
15957	0.248389	0.00376502	15957	-13.8039	1.32914
15956	0.248418	0.00376335	15956	-13.8305	1.3319
15955	0.248448	0.00376182	15955	-13.8572	1.33459
15954	0.248478	0.00376042	15954	-13.8841	1.33721
15953	0.248507	0.00375917	15953	-13.9111	1.33976
15952	0.248537	0.00375806	15952	-13.9382	1.34223
15951	0.248567	0.0037571	15951	-13.9654	1.34464
15950	0.248597	0.0037563	15950	-13.9928	1.34697
15949	0.248627	0.00375566	15949	-14.0203	1.34923
15948	0.248657	0.00375518	15948	-14.0479	1.35141
15947	0.248687	0.00375487	15947	-14.0757	1.35352
15946	0.248717	0.00375474	15946	-14.1036	1.35554
15945	0.248747	0.00375478	15945	-14.1316	1.35749
15944	0.248777	0.003755	15944	-14.1598	1.35936
15943	0.248807	0.00375541	15943	-14.1881	1.36115
15942	0.248837	0.003756	15942	-14.2165	1.36286
15941	0.248867	0.00375679	15941	-14.2451	1.36449
15940	0.248897	0.00375777	15940	-14.2738	1.36604
15939	0.248927	0.00375895	15939	-14.3026	1.3675
15938	0.248957	0.00376034	15938	-14.3316	1.36888
15937	0.248987	0.00376193	15937	-14.3607	1.37017
15936	0.249018	0.00376373	15936	-14.39	1.37138
15935	0.249048	0.00376575	15935	-14.4194	1.3725
15934	0.249078	0.00376798	15934	-14.4489	1.37353
15933	0.249108	0.00377043	15933	-14.4786	1.37448
15932	0.249138	0.00377311	15932	-14.5084	1.37535
15931	0.249168	0.003776	15931	-14.5384	1.37614
15930	0.249197	0.00377912	15930	-14.5685	1.37685
15929	0.249227	0.00378246	15929	-14.5987	1.37748
15928	0.249257	0.00378602	15928	-14.629	1.37803
15927	0.249287	0.00378981	15927	-14.6595	1.37851
15926	0.249317	0.00379383	15926	-14.69	1.37892
15925	0.249346	0.00379807	15925	-14.7207	1.37925
15924	0.249376	0.00380255	15924	-14.7515	1.37952
15923	0.249406	0.00380725	15923	-14.7824	1.37973
15922	0.249435	0.00381218	15922	-14.8134	1.37986
15921	0.249464	0.00381733	15921	-14.8445	1.37994
15920	0.249494	0.00382273	15920	-14.8756	1.37995
15919	0.249523	0.00382835	15919	-14.9069	1.37991
15918	0.249552	0.0038342	15918	-14.9383	1.37981
15917	0.249581	0.00384029	15917	-14.9698	1.37965
15916	0.24961	0.0038466	15916	-15.0013	1.37944
15915	0.249639	0.00385315	15915	-15.0329	1.37917
15914	0.249668	0.00385994	15914	-15.0646	1.37886
15913	0.249697	0.00386695	15913	-15.0964	1.3785
15912	0.249725	0.0038742	15912	-15.1282	1.37809
15911	0.249754	0.00388168	15911	-15.1601	1.37764
15910	0.249782	0.0038894	15910	-15.1921	1.37714
15909	0.249811	0.00389735	15909	-15.2242	1.37661
15908	0.249839	0.00390553	15908	-15.2562	1.37603
15907	0.249867	0.00391395	15907	-15.2884	1.37542
15906	0.249895	0.00392259	15906	-15.3206	1.37477
15905	0.249922	0.00393148	15905	-15.3528	1.37408
15904	0.24995	0.00394059	15904	-15.3851	1.37337
15903	0.249978	0.00394993	15903	-15.4174	1.37262
15902	0.250005	0.00395951	15902	-15.4498	1.37184
15901	0.250032	0.00396932	15901	-15.4822	1.37104
15900	0.250059	0.00397936	15900	-15.5146	1.37021
15899	0.250086	0.00398963	15899	-15.5471	1.36935
15898	0.250113	0.00400013	15898	-15.5796	1.36847
15897	0.250139	0.00401086	15897	-15.6121	1.36757
15896	0.250166	0.00402182	15896	-15.6446	1.36665
15895	0.250192	0.00403301	15895	-15.6772	1.36572
15894	0.250218	0.00404442	15894	-15.7097	1.36476
15893	0.250244	0.00405606	15893	-15.7423	1.36379
15892	0.25027	0.00406793	15892	-15.7748	1.36281
15891	0.250295	0.00408002	15891	-15.8074	1.36181
15890	0.250321	0.00409234	15890	-15.84	1.36081
15889	0.250346	0.00410488	15889	-15.8725	1.35979
15888	0.250371	0.00411765	15888	-15.9051	1.35876
15887	0.250395	0.00413064	15887	-15.9376	1.35773
15886	0.25042	0.00414385	15886	-15.9701	1.35669
15885	0.250444	0.00415728	15885	-16.0026	1.35565
15884	0.250468	0.00417093	15884	-16.0351	1.35461
15883	0.250492	0.0041848	15883	-16.0676	1.35356
15882	0.250516	0.00419889	15882	-16.1	1.35251
15881	0.25054	0.0042132	15881	-16.1324	1.35146
15880	0.250563	0.00422772	15880	-16.1648	1.35042
15879	0.250586	0.00424246	15879	-16.1971	1.34937
15878	0.250609	0.00425741	15878	-16.2294	1.34833
15877	0.250631	0.00427258	15877	-16.2617	1.34729
15876	0.250653	0.00428796	15876	-16.2939	1.34626
15875	0.250675	0.00430355	15875	-16.3261	1.34524
15874	0.250697	0.00431936	15874	-16.3582	1.34422
15873	0.250719	0.00433537	15873	-16.3902	1.34321
15872	0.25074	0.00435159	15872	-16.4222	1.34221
15871	0.250761	0.00436803	15871	-16.4541	1.34122
15870	0.250782	0.00438467	15870	-16.486	1.34024
15869	0.250802	0.00440151	15869	-16.5177	1.33927
15868	0.250822	0.00441857	15868	-16.5494	1.33831
15867	0.250842	0.00443583	15867	-16.5811	1.33736
15866	0.250862	0.00445329	15866	-16.6126	1.33643
15865	0.250881	0.00447096	15865	-16.6441	1.33551
15864	0.250901	0.00448883	15864	-16.6755	1.33461
15863	0.250919	0.00450691	15863	-16.7068	1.33372
15862	0.250938	0.00452519	15862	-16.738	1.33284
15861	0.250956	0.00454366	15861	-16.7691	1.33198
15860	0.250974	0.00456234	15860	-16.8001	1.33114
15859	0.250991	0.00458122	15859	-16.831	1.33032
15858	0.251009	0.0046003	15858	-16.8618	1.32951
15857	0.251026	0.00461958	15857	-16.8925	1.32871
15856	0.251042	0.00463906	15856	-16.9231	1.32794
15855	0.251059	0.00465873	15855	-16.9536	1.32718
15854	0.251075	0.00467861	15854	-16.9839	1.32644
15853	0.25109	0.00469868	15853	-17.0141	1.32571
15852	0.251106	0.00471895	15852	-17.0442	1.32501
15851	0.251121	0.00473941	15851	-17.0742	1.32432
15850	0.251135	0.00476008	15850	-17.1041	1.32365
15849	0.251149	0.00478094	15849	-17.1338	1.323
15848	0.251163	0.00480199	15848	-17.1633	1.32237
15847	0.251177	0.00482325	15847	-17.1928	1.32175
15846	0.25119	0.00484469	15846	-17.222	1.32115
15845	0.251203	0.00486634	15845	-17.2512	1.32057
15844	0.251216	0.00488818	15844	-17.2802	1.32
15843	0.251228	0.0049102	15843	-17.309	1.31945
15842	0.251239	0.00493243	15842	-17.3377	1.31892
15841	0.251251	0.00495484	15841	-17.3662	1.3184
15840	0.251262	0.00497743	15840	-17.3946	1.31789
15839	0.251272	0.00500022	15839	-17.4228	1.31739
15838	0.251282	0.00502318	15838	-17.4509	1.31691
15837	0.251292	0.00504633	15837	-17.4788	1.31644
15836	0.251301	0.00506967	15836	-17.5065	1.31599
15835	0.25131	0.00509318	15835	-17.5341	1.31554
15834	0.251318	0.00511687	15834	-17.5615	1.3151
15833	0.251326	0.00514073	15833	-17.5888	1.31467
15832	0.251333	0.00516477	15832	-17.6158	1.31425
15831	0.25134	0.00518898	15831	-17.6427	1.31383
15830	0.251346	0.00521336	15830	-17.6695	1.31342
15829	0.251352	0.00523791	15829	-17.696	1.31302
15828	0.251357	0.00526263	15828	-17.7224	1.31262
15827	0.251362	0.00528751	15827	-17.7486	1.31223
15826	0.251366	0.00531256	15826	-17.7746	1.31184
15825	0.25137	0.00533777	15825	-17.8005	1.31145
15824	0.251373	0.00536313	15824	-17.8262	1.31106
15823	0.251375	0.00538865	15823	-17.8516	1.31067
15822	0.251377	0.00541433	15822	-17.8769	1.31028
15821	0.251379	0.00544017	15821	-17.902	1.30989
15820	0.25138	0.00546615	15820	-17.927	1.3095
15819	0.25138	0.00549228	15819	-17.9517	1.30911
15818	0.251379	0.00551856	15818	-17.9762	1.30871
15817	0.251378	0.00554499	15817	-18.0006	1.3083
15816	0.251377	0.00557156	15816	-18.0247	1.30789
15815	0.251374	0.00559827	15815	-18.0486	1.30747
15814	0.251371	0.00562512	15814	-18.0724	1.30705
15813	0.251368	0.00565211	15813	-18.0959	1.30661
15812	0.251364	0.00567923	15812	-18.1193	1.30616
15811	0.251359	0.00570649	15811	-18.1424	1.30571
15810	0.251353	0.00573388	15810	-18.1653	1.30524
15809	0.251347	0.0057614	15809	-18.1881	1.30475
15808	0.25134	0.00578905	15808	-18.2106	1.30426
15807	0.251332	0.00581682	15807	-18.2329	1.30374
15806	0.251324	0.00584472	15806	-18.255	1.30322
15805	0.251315	0.00587274	15805	-18.2768	1.30267
15804	0.251305	0.00590088	15804	-18.2985	1.3021
15803	0.251294	0.00592914	15803	-18.3199	1.30152
15802	0.251283	0.00595752	15802	-18.3411	1.30091
15801	0.251271	0.00598601	15801	-18.3621	1.30029
15800	0.251258	0.00601461	15800	-18.3829	1.29964
15799	0.251244	0.00604333	15799	-18.4034	1.29896
15798	0.25123	0.00607215	15798	-18.4238	1.29826
15797	0.251214	0.00610109	15797	-18.4438	1.29754
15796	0.251198	0.00613013	15796	-18.4637	1.29678
15795	0.251181	0.00615928	15795	-18.4833	1.296
15794	0.251164	0.00618853	15794	-18.5027	1.29519
15793	0.251145	0.00621788	15793	-18.5219	1.29435
15792	0.251126	0.00624733	15792	-18.5408	1.29348
15791	0.251105	0.00627689	15791	-18.5595	1.29258
15790	0.251084	0.00630654	15790	-18.5779	1.29164
15789	0.251062	0.00633629	15789	-18.5961	1.29066
15788	0.25104	0.00636613	15788	-18.6141	1.28965
15787	0.251016	0.00639607	15787	-18.6318	1.28861
15786	0.250991	0.0064261	15786	-18.6492	1.28752
15785	0.250966	0.00645622	15785	-18.6664	1.2864
15784	0.250939	0.00648644	15784	-18.6834	1.28524
15783	0.250912	0.00651675	15783	-18.7001	1.28403
15782	0.250884	0.00654714	15782	-18.7165	1.28279
15781	0.250854	0.00657763	15781	-18.7327	1.2815
15780	0.250824	0.0066082	15780	-18.7487	1.28017
15779	0.250793	0.00663886	15779	-18.7644	1.2788
15778	0.250761	0.0066696	15778	-18.7798	1.27739
15777	0.250728	0.00670044	15777	-18.795	1.27594
15776	0.250694	0.00673135	15776	-18.8099	1.27445
15775	0.250659	0.00676236	15775	-18.8246	1.27292
15774	0.250624	0.00679344	15774	-18.8391	1.27136
15773	0.250587	0.00682461	15773	-18.8533	1.26975
15772	0.250549	0.00685586	15772	-18.8673	1.26811
15771	0.250511	0.00688719	15771	-18.881	1.26644
15770	0.250471	0.00691861	15770	-18.8945	1.26472
15769	0.25043	0.0069501	15769	-18.9077	1.26298
15768	0.250389	0.00698167	15768	-18.9207	1.26119
15767	0.250347	0.00701332	15767	-18.9335	1.25938
15766	0.250303	0.00704505	15766	-18.946	1.25753
15765	0.250259	0.00707685	15765	-18.9583	1.25565
15764	0.250213	0.00710873	15764	-18.9704	1.25374
15763	0.250167	0.00714069	15763	-18.9823	1.2518
15762	0.25012	0.00717272	15762	-18.9939	1.24983
15761	0.250072	0.00720483	15761	-19.0052	1.24783
15760	0.250023	0.00723701	15760	-19.0164	1.2458
15759	0.249972	0.00726926	15759	-19.0273	1.24375
15758	0.249921	0.00730158	15758	-19.038	1.24167
15757	0.249869	0.00733398	15757	-19.0485	1.23956
15756	0.249816	0.00736644	15756	-19.0587	1.23743
15755	0.249762	0.00739898	15755	-19.0688	1.23528
15754	0.249707	0.00743158	15754	-19.0786	1.2331
15753	0.249651	0.00746426	15753	-19.0882	1.23091
15752	0.249594	0.007497	15752	-19.0975	1.22869
15751	0.249536	0.00752981	15751	-19.1067	1.22645
15750	0.249477	0.00756268	15750	-19.1156	1.22419
15749	0.249418	0.00759562	15749	-19.1243	1.22192
15748	0.249357	0.00762863	15748	-19.1328	1.21963
15747	0.249295	0.0076617	15747	-19.1411	1.21732
15746	0.249232	0.00769484	15746	-19.1492	1.215
15745	0.249168	0.00772804	15745	-19.1571	1.21266
15744	0.249103	0.00776131	15744	-19.1648	1.21031
15743	0.249038	0.00779464	15743	-19.1722	1.20795
15742	0.248971	0.00782803	15742	-19.1795	1.20558
15741	0.248903	0.00786149	15741	-19.1865	1.2032
15740	0.248834	0.00789501	15740	-19.1934	1.20081
15739	0.248764	0.00792859	15739	-19.2	1.19842
15738	0.248694	0.00796223	15738	-19.2064	1.19601
15737	0.248622	0.00799593	15737	-19.2127	1.19361
15736	0.248549	0.0080297	15736	-19.2187	1.19119
15735	0.248475	0.00806353	15735	-19.2246	1.18878
15734	0.2484	0.00809741	15734	-19.2302	1.18636
15733	0.248324	0.00813136	15733	-19.2357	1.18394
15732	0.248248	0.00816538	15732	-19.2409	1.18153
15731	0.24817	0.00819945	15731	-19.246	1.17911
15730	0.248091	0.00823359	15730	-19.2508	1.17669
15729	0.248011	0.00826779	15729	-19.2555	1.17428
15728	0.24793	0.00830205	15728	-19.26	1.17188
15727	0.247848	0.00833638	15727	-19.2643	1.16948
15726	0.247765	0.00837076	15726	-19.2684	1.16708
15725	0.247681	0.00840522	15725	-19.2724	1.1647
15724	0.247597	0.00843973	15724	-19.2761	1.16232
15723	0.247511	0.00847431	15723	-19.2797	1.15996
15722	0.247424	0.00850896	15722	-19.2831	1.1576
15721	0.247336	0.00854368	15721	-19.2863	1.15526
15720	0.247246	0.00857846	15720	-19.2893	1.15293
15719	0.247156	0.00861331	15719	-19.2921	1.15062
15718	0.247065	0.00864823	15718	-19.2948	1.14833
15717	0.246973	0.00868322	15717	-19.2973	1.14605
15716	0.24688	0.00871828	15716	-19.2996	1.14379
15715	0.246786	0.00875341	15715	-19.3017	1.14154
15714	0.24669	0.00878862	15714	-19.3037	1.13932
15713	0.246594	0.00882391	15713	-19.3055	1.13713
15712	0.246497	0.00885927	15712	-19.3071	1.13495
15711	0.246399	0.00889471	15711	-19.3086	1.1328
15710	0.246299	0.00893023	15710	-19.3098	1.13067
15709	0.246199	0.00896584	15709	-19.311	1.12857
15708	0.246097	0.00900153	15708	-19.3119	1.1265
15707	0.245995	0.0090373	15707	-19.3127	1.12446
15706	0.245891	0.00907317	15706	-19.3134	1.12244
15705	0.245786	0.00910912	15705	-19.3138	1.12046
15704	0.245681	0.00914517	15704	-19.3141	1.11851
15703	0.245574	0.00918132	15703	-19.3143	1.11659
15702	0.245466	0.00921756	15702	-19.3143	1.11471
15701	0.245357	0.00925391	15701	-19.3141	1.11286
15700	0.245247	0.00929036	15700	-19.3138	1.11105
15699	0.245136	0.00932692	15699	-19.3133	1.10928
15698	0.245024	0.00936358	15698	-19.3127	1.10754
15697	0.244911	0.00940037	15697	-19.3119	1.10585
15696	0.244797	0.00943727	15696	-19.311	1.10419
15695	0.244682	0.0094743	15695	-19.3099	1.10258
15694	0.244566	0.00951146	15694	-19.3087	1.10101
15693	0.244448	0.00954876	15693	-19.3073	1.09948
15692	0.24433	0.0095862	15692	-19.3058	1.09799
15691	0.244211	0.00962379	15691	-19.3041	1.09655
15690	0.244091	0.00966155	15690	-19.3023	1.09515
15689	0.243969	0.00969946	15689	-19.3003	1.09379
15688	0.243847	0.00973754	15688	-19.2982	1.09248
15687	0.243724	0.0097758	15687	-19.296	1.09121
15686	0.2436	0.00981423	15686	-19.2936	1.08999
15685	0.243476	0.00985286	15685	-19.2911	1.08882
15684	0.24335	0.00989166	15684	-19.2885	1.08769
15683	0.243223	0.00993067	15683	-19.2857	1.08662
15682	0.243096	0.00996987	15682	-19.2827	1.08559
15681	0.242967	0.0100093	15681	-19.2797	1.0846
15680	0.242838	0.0100489	15680	-19.2765	1.08367
15679	0.242708	0.0100887	15679	-19.2732	1.08279
15678	0.242577	0.0101288	15678	-19.2697	1.08196
15677	0.242445	0.0101691	15677	-19.2661	1.08117
15676	0.242313	0.0102096	15676	-19.2624	1.08044
15675	0.24218	0.0102503	15675	-19.2586	1.07976
15674	0.242045	0.0102912	15674	-19.2546	1.07914
15673	0.241911	0.0103324	15673	-19.2505	1.07856
15672	0.241775	0.0103739	15672	-19.2463	1.07804
15671	0.241639	0.0104156	15671	-19.2419	1.07757
15670	0.241502	0.0104575	15670	-19.2375	1.07716
15669	0.241364	0.0104997	15669	-19.2329	1.0768
15668	0.241226	0.0105422	15668	-19.2282	1.07649
15667	0.241087	0.0105849	15667	-19.2233	1.07624
15666	0.240947	0.0106278	15666	-19.2184	1.07604
15665	0.240806	0.0106711	15665	-19.2133	1.07591
15664	0.240665	0.0107146	15664	-19.2082	1.07582
15663	0.240524	0.0107583	15663	-19.2029	1.0758
15662	0.240381	0.0108024	15662	-19.1975	1.07583
15661	0.240239	0.0108467	15661	-19.1919	1.07592
15660	0.240095	0.0108913	15660	-19.1863	1.07606
15659	0.239951	0.0109361	15659	-19.1806	1.07627
15658	0.239806	0.0109813	15658	-19.1747	1.07653
15657	0.239661	0.0110267	15657	-19.1688	1.07685
15656	0.239515	0.0110724	15656	-19.1627	1.07723
15655	0.239369	0.0111184	15655	-19.1565	1.07767
15654	0.239222	0.0111647	15654	-19.1502	1.07816
15653	0.239075	0.0112113	15653	-19.1439	1.07872
15652	0.238927	0.0112581	15652	-19.1374	1.07934
15651	0.238779	0.0113052	15651	-19.1308	1.08002
15650	0.23863	0.0113527	15650	-19.1241	1.08076
15649	0.238481	0.0114004	15649	-19.1173	1.08155
15648	0.238332	0.0114484	15648	-19.1104	1.08241
15647	0.238182	0.0114967	15647	-19.1035	1.08333
15646	0.238031	0.0115453	15646	-19.0964	1.08432
15645	0.23788	0.0115942	15645	-19.0892	1.08536
15644	0.237729	0.0116433	15644	-19.0819	1.08646
15643	0.237578	0.0116928	15643	-19.0746	1.08763
15642	0.237426	0.0117425	15642	-19.0671	1.08885
15641	0.237273	0.0117926	15641	-19.0596	1.09014
15640	0.237121	0.0118429	15640	-19.052	1.09149
15639	0.236968	0.0118935	15639	-19.0442	1.09291
15638	0.236814	0.0119445	15638	-19.0364	1.09438
15637	0.236661	0.0119957	15637	-19.0285	1.09592
15636	0.236507	0.0120472	15636	-19.0206	1.09751
15635	0.236353	0.0120989	15635	-19.0125	1.09918
15634	0.236198	0.012151	15634	-19.0044	1.1009
15633	0.236044	0.0122034	15633	-18.9961	1.10268
15632	0.235889	0.012256	15632	-18.9878	1.10453
15631	0.235734	0.0123089	15631	-18.9794	1.10644
15630	0.235578	0.0123622	15630	-18.971	1.10841
15629	0.235423	0.0124157	15629	-18.9624	1.11045
15628	0.235267	0.0124694	15628	-18.9538	1.11254
15627	0.235111	0.0125235	15627	-18.9451	1.1147
15626	0.234955	0.0125778	15626	-18.9363	1.11692
15625	0.234799	0.0126324	15625	-18.9275	1.11921
15624	0.234643	0.0126873	15624	-18.9186	1.12155
15623	0.234486	0.0127425	15623	-18.9096	1.12396
15622	0.23433	0.0127979	15622	-18.9005	1.12643
15621	0.234173	0.0128536	15621	-18.8914	1.12896
15620	0.234016	0.0129096	15620	-18.8822	1.13155
15619	0.233859	0.0129659	15619	-18.8729	1.13421
15618	0.233703	0.0130224	15618	-18.8636	1.13692
15617	0.233546	0.0130792	15617	-18.8542	1.1397
15616	0.233389	0.0131362	15616	-18.8447	1.14254
15615	0.233232	0.0131935	15615	-18.8352	1.14545
15614	0.233075	0.0132511	15614	-18.8256	1.14841
15613	0.232918	0.0133089	15613	-18.816	1.15143
15612	0.232761	0.013367	15612	-18.8063	1.15452
15611	0.232604	0.0134254	15611	-18.7965	1.15767
15610	0.232447	0.013484	15610	-18.7867	1.16087
15609	0.23229	0.0135428	15609	-18.7769	1.16414
15608	0.232134	0.0136019	15608	-18.7669	1.16747
15607	0.231977	0.0136613	15607	-18.757	1.17086
15606	0.231821	0.0137209	15606	-18.7469	1.17432
15605	0.231664	0.0137807	15605	-18.7368	1.17783
15604	0.231508	0.0138408	15604	-18.7267	1.1814
15603	0.231352	0.0139011	15603	-18.7165	1.18503
15602	0.231196	0.0139616	15602	-18.7063	1.18872
15601	0.23104	0.0140224	15601	-18.696	1.19247
15600	0.230884	0.0140833	15600	-18.6857	1.19628
15599	0.230729	0.0141444	15599	-18.6753	1.20014
15598	0.230574	0.0142057	15598	-18.6648	1.20406
15597	0.230419	0.0142672	15597	-18.6544	1.20804
15596	0.230264	0.0143288	15596	-18.6438	1.21207
15595	0.23011	0.0143905	15595	-18.6332	1.21616
15594	0.229956	0.0144524	15594	-18.6226	1.2203
15593	0.229802	0.0145145	15593	-18.6119	1.22449
15592	0.229649	0.0145766	15592	-18.6012	1.22873
15591	0.229496	0.0146388	15591	-18.5905	1.23303
15590	0.229343	0.0147012	15590	-18.5796	1.23738
15589	0.229191	0.0147636	15589	-18.5688	1.24178
15588	0.229039	0.0148261	15588	-18.5579	1.24623
15587	0.228887	0.0148886	15587	-18.5469	1.25073
15586	0.228737	0.0149512	15586	-18.5359	1.25527
15585	0.228586	0.0150138	15585	-18.5249	1.25987
15584	0.228436	0.0150764	15584	-18.5138	1.26451
15583	0.228287	0.0151391	15583	-18.5027	1.26919
15582	0.228138	0.0152017	15582	-18.4915	1.27392
15581	0.227989	0.0152643	15581	-18.4803	1.2787
15580	0.227841	0.0153269	15580	-18.4691	1.28352
15579	0.227694	0.0153895	15579	-18.4578	1.28838
15578	0.227547	0.015452	15578	-18.4464	1.29329
15577	0.227401	0.0155144	15577	-18.435	1.29823
15576	0.227256	0.0155768	15576	-18.4236	1.30322
15575	0.227111	0.0156391	15575	-18.4122	1.30825
15574	0.226967	0.0157013	15574	-18.4007	1.31332
15573	0.226824	0.0157633	15573	-18.3891	1.31842
15572	0.226681	0.0158253	15572	-18.3775	1.32356
15571	0.226539	0.0158871	15571	-18.3659	1.32874
15570	0.226398	0.0159487	15570	-18.3542	1.33396
15569	0.226257	0.0160102	15569	-18.3426	1.33921
15568	0.226118	0.0160715	15568	-18.3308	1.34449
15567	0.225979	0.0161326	15567	-18.319	1.34981
15566	0.225841	0.0161936	15566	-18.3072	1.35516
15565	0.225703	0.0162543	15565	-18.2954	1.36055
15564	0.225567	0.0163147	15564	-18.2835	1.36596
15563	0.225432	0.016375	15563	-18.2716	1.37141
15562	0.225297	0.016435	15562	-18.2596	1.37688
15561	0.225163	0.0164947	15561	-18.2476	1.38239
15560	0.22503	0.0165541	15560	-18.2356	1.38792
15559	0.224898	0.0166132	15559	-18.2235	1.39348
15558	0.224768	0.0166721	15558	-18.2114	1.39906
15557	0.224638	0.0167306	15557	-18.1993	1.40468
15556	0.224509	0.0167888	15556	-18.1871	1.41031
15555	0.224381	0.0168467	15555	-18.1749	1.41598
15554	0.224254	0.0169042	15554	-18.1627	1.42166
15553	0.224128	0.0169613	15553	-18.1504	1.42737
15552	0.224003	0.017018	15552	-18.1381	1.4331
15551	0.223879	0.0170744	15551	-18.1258	1.43885
15550	0.223757	0.0171304	15550	-18.1135	1.44462
15549	0.223635	0.0171859	15549	-18.1011	1.45042
15548	0.223515	0.017241	15548	-18.0886	1.45623
15547	0.223396	0.0172957	15547	-18.0762	1.46206
15546	0.223278	0.0173499	15546	-18.0637	1.46791
15545	0.223161	0.0174037	15545	-18.0512	1.47377
15544	0.223046	0.017457	15544	-18.0386	1.47965
15543	0.222931	0.0175098	15543	-18.0261	1.48555
15542	0.222818	0.0175621	15542	-18.0135	1.49146
15541	0.222706	0.0176139	15541	-18.0008	1.49739
15540	0.222596	0.0176651	15540	-17.9882	1.50333
15539	0.222486	0.0177159	15539	-17.9755	1.50929
15538	0.222379	0.0177661	15538	-17.9628	1.51526
15537	0.222272	0.0178157	15537	-17.95	1.52124
15536	0.222167	0.0178648	15536	-17.9373	1.52723
15535	0.222063	0.0179133	15535	-17.9245	1.53323
15534	0.22196	0.0179612	15534	-17.9117	1.53924
15533	0.221859	0.0180085	15533	-17.8988	1.54527
15532	0.22176	0.0180552	15532	-17.886	1.5513
15531	0.221662	0.0181013	15531	-17.8731	1.55734
15530	0.221565	0.0181468	15530	-17.8601	1.56339
15529	0.22147	0.0181917	15529	-17.8472	1.56944
15528	0.221376	0.0182359	15528	-17.8342	1.57551
15527	0.221284	0.0182794	15527	-17.8212	1.58158
15526	0.221193	0.0183223	15526	-17.8082	1.58766
15525	0.221104	0.0183645	15525	-17.7952	1.59374
15524	0.221016	0.018406	15524	-17.7821	1.59983
15523	0.220931	0.0184469	15523	-17.7691	1.60592
15522	0.220846	0.018487	15522	-17.756	1.61202
15521	0.220763	0.0185265	15521	-17.7428	1.61813
15520	0.220682	0.0185652	15520	-17.7297	1.62424
15519	0.220603	0.0186033	15519	-17.7165	1.63035
15518	0.220525	0.0186406	15518	-17.7034	1.63646
15517	0.220449	0.0186771	15517	-17.6902	1.64258
15516	0.220375	0.018713	15516	-17.6769	1.6487
15515	0.220303	0.018748	15515	-17.6637	1.65483
15514	0.220232	0.0187824	15514	-17.6504	1.66095
15513	0.220163	0.018816	15513	-17.6372	1.66708
15512	0.220096	0.0188488	15512	-17.6239	1.67321
15511	0.22003	0.0188809	15511	-17.6105	1.67935
15510	0.219967	0.0189122	15510	-17.5972	1.68548
15509	0.219905	0.0189427	15509	-17.5839	1.69162
15508	0.219845	0.0189724	15508	-17.5705	1.69775
15507	0.219787	0.0190014	15507	-17.5571	1.70389
15506	0.219731	0.0190296	15506	-17.5437	1.71003
15505	0.219677	0.019057	15505	-17.5303	1.71618
15504	0.219625	0.0190837	15504	-17.5169	1.72232
15503	0.219574	0.0191095	15503	-17.5035	1.72846
15502	0.219526	0.0191346	15502	-17.49	1.73461
15501	0.219479	0.0191589	15501	-17.4765	1.74076
15500	0.219435	0.0191825	15500	-17.4631	1.7469
15499	0.219392	0.0192055	15499	-17.4496	1.75305
15498	0.219351	0.0192278	15498	-17.4361	1.7592
15497	0.219312	0.0192494	15497	-17.4227	1.76535
15496	0.219275	0.0192704	15496	-17.4092	1.7715
15495	0.219239	0.0192909	15495	-17.3958	1.77765
15494	0.219205	0.0193107	15494	-17.3823	1.78379
15493	0.219173	0.0193301	15493	-17.3689	1.78994
15492	0.219142	0.0193489	15492	-17.3555	1.79608
15491	0.219113	0.0193672	15491	-17.3421	1.80222
15490	0.219086	0.019385	15490	-17.3287	1.80836
15489	0.21906	0.0194025	15489	-17.3154	1.8145
15488	0.219036	0.0194195	15488	-17.3021	1.82064
15487	0.219013	0.0194361	15487	-17.2888	1.82677
15486	0.218991	0.0194523	15486	-17.2756	1.83289
15485	0.218971	0.0194682	15485	-17.2624	1.83902
15484	0.218953	0.0194838	15484	-17.2492	1.84513
15483	0.218936	0.0194991	15483	-17.2361	1.85124
15482	0.21892	0.0195142	15482	-17.223	1.85735
15481	0.218906	0.019529	15481	-17.21	1.86345
15480	0.218893	0.0195436	15480	-17.197	1.86954
15479	0.218881	0.019558	15479	-17.1841	1.87562
15478	0.21887	0.0195722	15478	-17.1713	1.8817
15477	0.218861	0.0195863	15477	-17.1585	1.88777
15476	0.218853	0.0196002	15476	-17.1457	1.89382
15475	0.218846	0.0196141	15475	-17.1331	1.89987
15474	0.21884	0.0196279	15474	-17.1205	1.90591
15473	0.218835	0.0196417	15473	-17.108	1.91193
15472	0.218832	0.0196554	15472	-17.0955	1.91795
15471	0.218829	0.0196692	15471	-17.0832	1.92395
15470	0.218828	0.019683	15470	-17.0709	1.92994
15469	0.218827	0.0196968	15469	-17.0587	1.93591
15468	0.218827	0.0197107	15468	-17.0466	1.94187
15467	0.218829	0.0197247	15467	-17.0346	1.94781
15466	0.218831	0.0197388	15466	-17.0227	1.95374
15465	0.218834	0.0197531	15465	-17.0108	1.95965
15464	0.218838	0.0197675	15464	-16.9991	1.96554
15463	0.218843	0.0197821	15463	-16.9875	1.97142
15462	0.218849	0.019797	15462	-16.976	1.97728
15461	0.218855	0.019812	15461	-16.9646	1.98311
15460	0.218862	0.0198274	15460	-16.9533	1.98893
15459	0.21887	0.019843	15459	-16.9421	1.99473
15458	0.218879	0.0198589	15458	-16.931	2.0005
15457	0.218888	0.0198751	15457	-16.9201	2.00625
15456	0.218898	0.0198916	15456	-16.9092	2.01198
15455	0.218908	0.0199086	15455	-16.8985	2.01769
15454	0.218919	0.0199259	15454	-16.888	2.02337
15453	0.218931	0.0199436	15453	-16.8775	2.02902
15452	0.218943	0.0199617	15452	-16.8672	2.03466
15451	0.218955	0.0199803	15451	-16.8571	2.04026
15450	0.218968	0.0199993	15450	-16.847	2.04584
15449	0.218982	0.0200188	15449	-16.8372	2.05139
15448	0.218996	0.0200388	15448	-16.8274	2.05691
15447	0.21901	0.0200594	15447	-16.8178	2.0624
15446	0.219025	0.0200805	15446	-16.8084	2.06786
15445	0.21904	0.0201021	15445	-16.7991	2.0733
15444	0.219055	0.0201243	15444	-16.79	2.0787
15443	0.21907	0.0201471	15443	-16.7811	2.08407
15442	0.219086	0.0201705	15442	-16.7723	2.08941
15441	0.219102	0.0201945	15441	-16.7636	2.09472
15440	0.219118	0.0202192	15440	-16.7552	2.09999
15439	0.219134	0.0202446	15439	-16.7469	2.10524
15438	0.219151	0.0202706	15438	-16.7388	2.11045
15437	0.219167	0.0202973	15437	-16.7309	2.11562
15436	0.219184	0.0203247	15436	-16.7231	2.12076
15435	0.2192	0.0203528	15435	-16.7155	2.12587
15434	0.219217	0.0203817	15434	-16.7082	2.13095
15433	0.219234	0.0204114	15433	-16.701	2.13598
15432	0.21925	0.0204418	15432	-16.694	2.14099
15431	0.219267	0.0204729	15431	-16.6872	2.14595
15430	0.219283	0.0205049	15430	-16.6806	2.15089
15429	0.219299	0.0205377	15429	-16.6742	2.15578
15428	0.219315	0.0205713	15428	-16.668	2.16064
15427	0.219331	0.0206057	15427	-16.662	2.16547
15426	0.219347	0.020641	15426	-16.6562	2.17026
15425	0.219362	0.0206771	15425	-16.6507	2.17502
15424	0.219378	0.0207141	15424	-16.6453	2.17975
15423	0.219393	0.0207519	15423	-16.6401	2.18445
15422	0.219407	0.0207905	15422	-16.6352	2.18912
15421	0.219422	0.02083	15421	-16.6304	2.19377
15420	0.219436	0.0208703	15420	-16.6258	2.19839
15419	0.21945	0.0209114	15419	-16.6214	2.20299
15418	0.219464	0.0209534	15418	-16.6172	2.20757
15417	0.219477	0.0209962	15417	-16.6131	2.21213
15416	0.219491	0.0210399	15416	-16.6093	2.21667
15415	0.219503	0.0210843	15415	-16.6056	2.2212
15414	0.219516	0.0211296	15414	-16.6022	2.22571
15413	0.219528	0.0211757	15413	-16.5989	2.2302
15412	0.219539	0.0212227	15412	-16.5957	2.23469
15411	0.219551	0.0212704	15411	-16.5928	2.23916
15410	0.219562	0.021319	15410	-16.59	2.24363
15409	0.219572	0.0213683	15409	-16.5874	2.24809
15408	0.219582	0.0214185	15408	-16.5849	2.25254
15407	0.219592	0.0214695	15407	-16.5826	2.25699
15406	0.219601	0.0215212	15406	-16.5805	2.26144
15405	0.21961	0.0215737	15405	-16.5785	2.26588
15404	0.219619	0.0216271	15404	-16.5767	2.27032
15403	0.219627	0.0216811	15403	-16.575	2.27477
15402	0.219634	0.021736	15402	-16.5735	2.27921
15401	0.219641	0.0217916	15401	-16.5721	2.28366
15400	0.219647	0.021848	15400	-16.5709	2.28811
15399	0.219653	0.0219051	15399	-16.5699	2.29257
15398	0.219659	0.0219629	15398	-16.5689	2.29704
15397	0.219664	0.0220215	15397	-16.5682	2.30152
15396	0.219668	0.0220808	15396	-16.5675	2.306
15395	0.219672	0.0221408	15395	-16.567	2.3105
15394	0.219675	0.0222016	15394	-16.5666	2.315
15393	0.219677	0.022263	15393	-16.5664	2.31952
15392	0.219679	0.0223251	15392	-16.5663	2.32405
15391	0.219681	0.0223879	15391	-16.5663	2.3286
15390	0.219682	0.0224513	15390	-16.5664	2.33316
15389	0.219682	0.0225155	15389	-16.5667	2.33774
15388	0.219681	0.0225802	15388	-16.5671	2.34234
15387	0.21968	0.0226456	15387	-16.5676	2.34696
15386	0.219678	0.0227117	15386	-16.5682	2.35159
15385	0.219676	0.0227784	15385	-16.5689	2.35625
15384	0.219672	0.0228457	15384	-16.5698	2.36093
15383	0.219668	0.0229135	15383	-16.5707	2.36563
15382	0.219664	0.022982	15382	-16.5718	2.37035
15381	0.219658	0.0230511	15381	-16.5729	2.3751
15380	0.219652	0.0231207	15380	-16.5742	2.37987
15379	0.219646	0.0231909	15379	-16.5756	2.38466
15378	0.219638	0.0232617	15378	-16.577	2.38949
15377	0.219629	0.023333	15377	-16.5786	2.39434
15376	0.21962	0.0234048	15376	-16.5802	2.39921
15375	0.21961	0.0234772	15375	-16.582	2.40412
15374	0.2196	0.02355	15374	-16.5838	2.40905
15373	0.219588	0.0236234	15373	-16.5858	2.41401
15372	0.219575	0.0236972	15372	-16.5878	2.41901
15371	0.219562	0.0237716	15371	-16.5898	2.42403
15370	0.219548	0.0238464	15370	-16.592	2.42909
15369	0.219533	0.0239216	15369	-16.5943	2.43418
15368	0.219517	0.0239973	15368	-16.5966	2.4393
15367	0.2195	0.0240735	15367	-16.599	2.44445
15366	0.219483	0.0241501	15366	-16.6015	2.44964
15365	0.219464	0.0242271	15365	-16.604	2.45487
15364	0.219444	0.0243045	15364	-16.6066	2.46012
15363	0.219424	0.0243823	15363	-16.6093	2.46542
15362	0.219403	0.0244605	15362	-16.612	2.47075
15361	0.21938	0.0245391	15361	-16.6148	2.47612
15360	0.219357	0.024618	15360	-16.6177	2.48152
15359	0.219332	0.0246974	15359	-16.6206	2.48697
15358	0.219307	0.024777	15358	-16.6235	2.49245
15357	0.219281	0.0248571	15357	-16.6265	2.49797
15356	0.219253	0.0249374	15356	-16.6296	2.50353
15355	0.219225	0.0250181	15355	-16.6327	2.50913
15354	0.219195	0.0250991	15354	-16.6359	2.51478
15353	0.219165	0.0251804	15353	-16.6391	2.52046
15352	0.219133	0.0252621	15352	-16.6423	2.52619
15351	0.219101	0.025344	15351	-16.6456	2.53196
15350	0.219067	0.0254262	15350	-16.6489	2.53778
15349	0.219032	0.0255087	15349	-16.6522	2.54364
15348	0.218996	0.0255915	15348	-16.6556	2.54954
15347	0.218959	0.0256746	15347	-16.659	2.5555
15346	0.218921	0.0257579	15346	-16.6624	2.56149
15345	0.218881	0.0258415	15345	-16.6659	2.56754
15344	0.218841	0.0259253	15344	-16.6693	2.57363
15343	0.218799	0.0260094	15343	-16.6728	2.57978
15342	0.218756	0.0260938	15342	-16.6763	2.58597
15341	0.218712	0.0261784	15341	-16.6799	2.59222
15340	0.218666	0.0262632	15340	-16.6834	2.59852
15339	0.218619	0.0263483	15339	-16.687	2.60487
15338	0.218571	0.0264336	15338	-16.6906	2.61128
15337	0.218521	0.0265191	15337	-16.6943	2.61775
15336	0.21847	0.0266049	15336	-16.698	2.62427
15335	0.218417	0.0266908	15335	-16.7017	2.63085
15334	0.218362	0.026777	15334	-16.7055	2.6375
15333	0.218306	0.0268634	15333	-16.7093	2.6442
15332	0.218248	0.0269501	15332	-16.7132	2.65097
15331	0.218188	0.0270369	15331	-16.7171	2.6578
15330	0.218126	0.0271239	15330	-16.7211	2.6647
15329	0.218062	0.0272111	15329	-16.7251	2.67166
15328	0.217996	0.0272984	15328	-16.7292	2.67869
15327	0.217928	0.027386	15327	-16.7334	2.68579
15326	0.217858	0.0274736	15326	-16.7376	2.69296
15325	0.217786	0.0275615	15325	-16.7419	2.7002
15324	0.217711	0.0276495	15324	-16.7463	2.70751
15323	0.217634	0.0277376	15323	-16.7508	2.71489
15322	0.217555	0.0278258	15322	-16.7554	2.72234
15321	0.217473	0.0279141	15321	-16.76	2.72986
15320	0.217388	0.0280026	15320	-16.7647	2.73746
15319	0.217302	0.0280911	15319	-16.7696	2.74513
15318	0.217212	0.0281797	15318	-16.7745	2.75288
15317	0.21712	0.0282683	15317	-16.7795	2.7607
15316	0.217025	0.028357	15316	-16.7846	2.7686
15315	0.216927	0.0284458	15315	-16.7899	2.77657
15314	0.216826	0.0285345	15314	-16.7952	2.78462
15313	0.216723	0.0286232	15313	-16.8006	2.79275
15312	0.216616	0.028712	15312	-16.8062	2.80095
15311	0.216506	0.0288007	15311	-16.8119	2.80924
15310	0.216393	0.0288894	15310	-16.8177	2.8176
15309	0.216277	0.028978	15309	-16.8236	2.82603
15308	0.216158	0.0290665	15308	-16.8297	2.83455
15307	0.216036	0.0291549	15307	-16.8359	2.84314
15306	0.21591	0.0292432	15306	-16.8422	2.85181
15305	0.21578	0.0293314	15305	-16.8487	2.86056
15304	0.215648	0.0294195	15304	-16.8553	2.86938
15303	0.215511	0.0295073	15303	-16.8621	2.87829
15302	0.215371	0.029595	15302	-16.869	2.88727
15301	0.215228	0.0296825	15301	-16.8761	2.89633
15300	0.21508	0.0297698	15300	-16.8833	2.90547
15299	0.214929	0.0298568	15299	-16.8906	2.91468
15298	0.214774	0.0299436	15298	-16.8982	2.92397
15297	0.214615	0.03003	15297	-16.9059	2.93334
15296	0.214452	0.0301162	15296	-16.9138	2.94278
15295	0.214286	0.030202	15295	-16.9218	2.9523
15294	0.214115	0.0302875	15294	-16.93	2.96189
15293	0.21394	0.0303727	15293	-16.9384	2.97156
15292	0.21376	0.0304574	15292	-16.947	2.98131
15291	0.213577	0.0305417	15291	-16.9557	2.99113
15290	0.213389	0.0306256	15290	-16.9647	3.00102
15289	0.213197	0.0307091	15289	-16.9738	3.01098
15288	0.213	0.030792	15288	-16.9832	3.02102
15287	0.212799	0.0308745	15287	-16.9927	3.03113
15286	0.212593	0.0309564	15286	-17.0024	3.04131
15285	0.212382	0.0310378	15285	-17.0124	3.05156
15284	0.212167	0.0311187	15284	-17.0225	3.06188
15283	0.211947	0.0311989	15283	-17.0329	3.07227
15282	0.211723	0.0312785	15282	-17.0435	3.08273
15281	0.211493	0.0313575	15281	-17.0543	3.09326
15280	0.211259	0.0314358	15280	-17.0653	3.10385
15279	0.211019	0.0315135	15279	-17.0765	3.11451
15278	0.210775	0.0315904	15278	-17.088	3.12524
15277	0.210525	0.0316666	15277	-17.0997	3.13603
15276	0.21027	0.031742	15276	-17.1116	3.14689
15275	0.21001	0.0318167	15275	-17.1238	3.15781
15274	0.209745	0.0318906	15274	-17.1362	3.1688
15273	0.209474	0.0319636	15273	-17.1488	3.17984
15272	0.209198	0.0320359	15272	-17.1617	3.19095
15271	0.208916	0.0321072	15271	-17.1749	3.20212
15270	0.208629	0.0321777	15270	-17.1883	3.21336
15269	0.208336	0.0322472	15269	-17.2019	3.22465
15268	0.208038	0.0323158	15268	-17.2159	3.236
15267	0.207734	0.0323834	15267	-17.23	3.24741
15266	0.207424	0.0324501	15266	-17.2445	3.25888
15265	0.207109	0.0325158	15265	-17.2592	3.27041
15264	0.206787	0.0325805	15264	-17.2742	3.28199
15263	0.20646	0.0326441	15263	-17.2894	3.29362
15262	0.206127	0.0327068	15262	-17.3049	3.30531
15261	0.205788	0.0327684	15261	-17.3207	3.31706
15260	0.205444	0.032829	15260	-17.3367	3.32885
15259	0.205094	0.0328886	15259	-17.353	3.3407
15258	0.204738	0.0329471	15258	-17.3695	3.35259
15257	0.204376	0.0330045	15257	-17.3863	3.36453
15256	0.204008	0.0330608	15256	-17.4034	3.37651
15255	0.203635	0.0331161	15255	-17.4207	3.38854
15254	0.203256	0.0331703	15254	-17.4382	3.40062
15253	0.202871	0.0332233	15253	-17.456	3.41273
15252	0.202481	0.0332753	15252	-17.4741	3.42489
15251	0.202084	0.0333261	15251	-17.4924	3.43708
15250	0.201682	0.0333758	15250	-17.5109	3.44931
15249	0.201275	0.0334243	15249	-17.5297	3.46158
15248	0.200861	0.0334717	15248	-17.5487	3.47388
15247	0.200442	0.0335179	15247	-17.568	3.48621
15246	0.200017	0.033563	15246	-17.5875	3.49858
15245	0.199586	0.0336068	15245	-17.6073	3.51097
15244	0.199149	0.0336495	15244	-17.6273	3.52339
15243	0.198707	0.0336909	15243	-17.6475	3.53584
15242	0.198259	0.0337311	15242	-17.668	3.54832
15241	0.197805	0.0337701	15241	-17.6886	3.56081
15240	0.197346	0.0338079	15240	-17.7096	3.57333
15239	0.196881	0.0338444	15239	-17.7307	3.58587
15238	0.19641	0.0338796	15238	-17.7521	3.59842
15237	0.195933	0.0339136	15237	-17.7738	3.61099
15236	0.195451	0.0339462	15236	-17.7956	3.62358
15235	0.194963	0.0339776	15235	-17.8177	3.63618
15234	0.194469	0.0340076	15234	-17.84	3.64879
15233	0.193969	0.0340364	15233	-17.8625	3.66141
15232	0.193464	0.0340638	15232	-17.8852	3.67404
15231	0.192953	0.0340898	15231	-17.9082	3.68667
15230	0.192437	0.0341145	15230	-17.9314	3.69931
15229	0.191914	0.0341379	15229	-17.9548	3.71195
15228	0.191386	0.0341598	15228	-17.9784	3.72459
15227	0.190852	0.0341804	15227	-18.0023	3.73723
15226	0.190313	0.0341995	15226	-18.0263	3.74987
15225	0.189767	0.0342173	15225	-18.0506	3.7625
15224	0.189216	0.0342336	15224	-18.0751	3.77513
15223	0.18866	0.0342485	15223	-18.0997	3.78775
15222	0.188097	0.034262	15222	-18.1246	3.80036
15221	0.187529	0.034274	15221	-18.1497	3.81296
15220	0.186956	0.0342845	15220	-18.1751	3.82554
15219	0.186376	0.0342936	15219	-18.2006	3.83812
15218	0.185791	0.0343011	15218	-18.2263	3.85067
15217	0.1852	0.0343072	15217	-18.2522	3.86321
15216	0.184604	0.0343118	15216	-18.2783	3.87574
15215	0.184001	0.0343148	15215	-18.3047	3.88824
15214	0.183394	0.0343164	15214	-18.3312	3.90072
15213	0.18278	0.0343164	15213	-18.3579	3.91317
15212	0.182161	0.0343148	15212	-18.3848	3.9256
15211	0.181536	0.0343117	15211	-18.4119	3.93801
15210	0.180905	0.0343071	15210	-18.4392	3.95039
15209	0.180269	0.0343009	15209	-18.4667	3.96274
15208	0.179627	0.0342933	15208	-18.4944	3.97506
15207	0.17898	0.0342842	15207	-18.5222	3.98735
15206	0.178328	0.0342737	15206	-18.5502	3.99962
15205	0.17767	0.0342617	15205	-18.5783	4.01186
15204	0.177007	0.0342485	15204	-18.6066	4.02406
15203	0.176339	0.0342339	15203	-18.635	4.03624
15202	0.175667	0.0342181	15202	-18.6634	4.04838
15201	0.174989	0.034201	15201	-18.692	4.06049
15200	0.174307	0.0341827	15200	-18.7207	4.07256
15199	0.17362	0.0341632	15199	-18.7495	4.0846
15198	0.172928	0.0341426	15198	-18.7784	4.09661
15197	0.172232	0.0341209	15197	-18.8073	4.10857
15196	0.171532	0.0340982	15196	-18.8362	4.1205
15195	0.170827	0.0340744	15195	-18.8652	4.13239
15194	0.170119	0.0340496	15194	-18.8943	4.14423
15193	0.169406	0.0340238	15193	-18.9234	4.15603
15192	0.168689	0.0339972	15192	-18.9524	4.16778
15191	0.167968	0.0339696	15191	-18.9815	4.17948
15190	0.167243	0.0339412	15190	-19.0106	4.19113
15189	0.166515	0.0339119	15189	-19.0397	4.20273
15188	0.165783	0.0338819	15188	-19.0687	4.21428
15187	0.165048	0.0338511	15187	-19.0977	4.22576
15186	0.164309	0.0338197	15186	-19.1267	4.23719
15185	0.163566	0.0337875	15185	-19.1556	4.24855
15184	0.162821	0.0337547	15184	-19.1844	4.25985
15183	0.162072	0.0337212	15183	-19.2131	4.27108
15182	0.161321	0.0336872	15182	-19.2418	4.28223
15181	0.160566	0.0336527	15181	-19.2704	4.29332
15180	0.159808	0.0336176	15180	-19.2989	4.30432
15179	0.159048	0.033582	15179	-19.3272	4.31525
15178	0.158285	0.033546	15178	-19.3554	4.32609
15177	0.157519	0.0335096	15177	-19.3835	4.33684
15176	0.156751	0.0334727	15176	-19.4115	4.3475
15175	0.155981	0.0334355	15175	-19.4393	4.35807
15174	0.155208	0.033398	15174	-19.4669	4.36854
15173	0.154433	0.0333602	15173	-19.4943	4.37891
15172	0.153656	0.0333221	15172	-19.5216	4.38917
15171	0.152877	0.0332838	15171	-19.5487	4.39932
15170	0.152096	0.0332452	15170	-19.5755	4.40935
15169	0.151313	0.0332065	15169	-19.6022	4.41927
15168	0.150528	0.0331676	15168	-19.6286	4.42907
15167	0.149742	0.0331286	15167	-19.6548	4.43874
15166	0.148954	0.0330895	15166	-19.6807	4.44828
15165	0.148165	0.0330503	15165	-19.7064	4.45769
15164	0.147374	0.033011	15164	-19.7318	4.46695
15163	0.146582	0.0329718	15163	-19.757	4.47608
15162	0.145789	0.0329325	15162	-19.7818	4.48505
15161	0.144994	0.0328932	15161	-19.8064	4.49387
15160	0.144199	0.032854	15160	-19.8307	4.50253
15159	0.143403	0.0328148	15159	-19.8546	4.51103
15158	0.142606	0.0327758	15158	-19.8782	4.51936
15157	0.141808	0.0327368	15157	-19.9015	4.52752
15156	0.14101	0.032698	15156	-19.9244	4.53551
15155	0.140211	0.0326593	15155	-19.947	4.54331
15154	0.139412	0.0326208	15154	-19.9692	4.55092
15153	0.138612	0.0325825	15153	-19.9911	4.55834
15152	0.137812	0.0325443	15152	-20.0125	4.56556
15151	0.137012	0.0325065	15151	-20.0336	4.57259
15150	0.136212	0.0324688	15150	-20.0542	4.5794
15149	0.135412	0.0324314	15149	-20.0745	4.586
15148	0.134612	0.0323943	15148	-20.0943	4.59238
15147	0.133812	0.0323574	15147	-20.1136	4.59854
15146	0.133013	0.0323209	15146	-20.1326	4.60447
15145	0.132214	0.0322847	15145	-20.1511	4.61017
15144	0.131416	0.0322488	15144	-20.1691	4.61563
15143	0.130618	0.0322132	15143	-20.1866	4.62084
15142	0.129821	0.032178	15142	-20.2036	4.6258
15141	0.129024	0.0321432	15141	-20.2202	4.63051
15140	0.128229	0.0321087	15140	-20.2363	4.63495
15139	0.127434	0.0320746	15139	-20.2518	4.63913
15138	0.126641	0.0320409	15138	-20.2668	4.64304
15137	0.125848	0.0320076	15137	-20.2813	4.64667
15136	0.125057	0.0319747	15136	-20.2952	4.65002
15135	0.124267	0.0319422	15135	-20.3086	4.65308
15134	0.123479	0.0319101	15134	-20.3214	4.65585
15133	0.122692	0.0318784	15133	-20.3336	4.65831
15132	0.121907	0.0318472	15132	-20.3453	4.66048
15131	0.121124	0.0318164	15131	-20.3563	4.66233
15130	0.120342	0.0317861	15130	-20.3668	4.66387
15129	0.119563	0.0317562	15129	-20.3766	4.66509
15128	0.118785	0.0317267	15128	-20.3858	4.66599
15127	0.118009	0.0316977	15127	-20.3945	4.66657
15126	0.117235	0.0316691	15126	-20.4025	4.66685
15125	0.116464	0.031641	15125	-20.4099	4.66681
15124	0.115694	0.0316133	15124	-20.4167	4.66647
15123	0.114927	0.031586	15123	-20.4229	4.66583
15122	0.114162	0.0315592	15122	-20.4286	4.66489
15121	0.113399	0.0315329	15121	-20.4336	4.66365
15120	0.112639	0.0315069	15120	-20.4381	4.66212
15119	0.111881	0.0314814	15119	-20.442	4.66029
15118	0.111126	0.0314564	15118	-20.4453	4.65819
15117	0.110372	0.0314318	15117	-20.448	4.6558
15116	0.109622	0.0314077	15116	-20.4502	4.65313
15115	0.108874	0.031384	15115	-20.4518	4.65018
15114	0.108129	0.0313607	15114	-20.4529	4.64696
15113	0.107386	0.0313379	15113	-20.4534	4.64348
15112	0.106646	0.0313155	15112	-20.4533	4.63973
15111	0.105909	0.0312935	15111	-20.4527	4.63572
15110	0.105175	0.031272	15110	-20.4516	4.63145
15109	0.104443	0.0312509	15109	-20.4499	4.62693
15108	0.103715	0.0312303	15108	-20.4476	4.62217
15107	0.102989	0.0312101	15107	-20.4449	4.61715
15106	0.102267	0.0311903	15106	-20.4416	4.6119
15105	0.101547	0.031171	15105	-20.4378	4.60641
15104	0.100831	0.031152	15104	-20.4334	4.60069
15103	0.100117	0.0311336	15103	-20.4285	4.59474
15102	0.0994073	0.0311155	15102	-20.4232	4.58856
15101	0.0987005	0.0310978	15101	-20.4173	4.58217
15100	0.097997	0.0310806	15100	-20.4108	4.57556
15099	0.0972969	0.0310638	15099	-20.4039	4.56873
15098	0.0966001	0.0310474	15098	-20.3965	4.5617
15097	0.0959068	0.0310313	15097	-20.3886	4.55447
15096	0.095217	0.0310157	15096	-20.3802	4.54704
15095	0.0945307	0.0310005	15095	-20.3713	4.53941
15094	0.093848	0.0309857	15094	-20.3619	4.5316
15093	0.0931689	0.0309713	15093	-20.352	4.52359
15092	0.0924935	0.0309572	15092	-20.3417	4.51541
15091	0.0918219	0.0309435	15091	-20.3309	4.50705
15090	0.091154	0.0309302	15090	-20.3196	4.49852
15089	0.09049	0.0309173	15089	-20.3078	4.48982
15088	0.0898298	0.0309047	15088	-20.2956	4.48096
15087	0.0891735	0.0308925	15087	-20.2829	4.47193
15086	0.0885212	0.0308806	15086	-20.2697	4.46276
15085	0.087873	0.0308691	15085	-20.2561	4.45343
15084	0.0872288	0.0308578	15084	-20.2421	4.44396
15083	0.0865887	0.030847	15083	-20.2276	4.43434
15082	0.0859528	0.0308364	15082	-20.2126	4.42459
15081	0.085321	0.0308261	15081	-20.1972	4.41471
15080	0.0846936	0.0308162	15080	-20.1814	4.4047
15079	0.0840704	0.0308065	15079	-20.1651	4.39456
15078	0.0834516	0.0307971	15078	-20.1485	4.38431
15077	0.0828372	0.030788	15077	-20.1313	4.37395
15076	0.0822273	0.0307792	15076	-20.1138	4.36347
15075	0.0816218	0.0307706	15075	-20.0959	4.35289
15074	0.0810209	0.0307622	15074	-20.0775	4.34221
15073	0.0804246	0.0307541	15073	-20.0587	4.33143
15072	0.0798329	0.0307462	15072	-20.0395	4.32057
15071	0.0792459	0.0307386	15071	-20.02	4.30961
15070	0.0786637	0.0307311	15070	-20	4.29857
15069	0.0780862	0.0307238	15069	-19.9796	4.28746
15068	0.0775136	0.0307167	15068	-19.9588	4.27627
15067	0.0769458	0.0307098	15067	-19.9377	4.26501
15066	0.076383	0.030703	15066	-19.9161	4.25369
15065	0.0758251	0.0306964	15065	-19.8942	4.24231
15064	0.0752723	0.0306899	15064	-19.8719	4.23087
15063	0.0747246	0.0306836	15063	-19.8492	4.21938
15062	0.0741819	0.0306773	15062	-19.8261	4.20784
15061	0.0736445	0.0306712	15061	-19.8027	4.19626
15060	0.0731122	0.0306651	15060	-19.7789	4.18465
15059	0.0725852	0.0306591	15059	-19.7548	4.173
15058	0.0720635	0.0306532	15058	-19.7303	4.16132
15057	0.0715472	0.0306473	15057	-19.7054	4.14961
15056	0.0710363	0.0306414	15056	-19.6802	4.13789
15055	0.0705309	0.0306355	15055	-19.6547	4.12615
15054	0.0700309	0.0306297	15054	-19.6288	4.11439
15053	0.0695365	0.0306238	15053	-19.6026	4.10263
15052	0.0690477	0.0306179	15052	-19.576	4.09086
15051	0.0685646	0.030612	15051	-19.5491	4.0791
15050	0.0680871	0.030606	15050	-19.5219	4.06734
15049	0.0676154	0.0306	15049	-19.4944	4.05558
15048	0.0671495	0.0305938	15048	-19.4665	4.04384
15047	0.0666894	0.0305876	15047	-19.4384	4.03212
15046	0.0662352	0.0305813	15046	-19.4099	4.02042
15045	0.065787	0.0305748	15045	-19.3811	4.00874
15044	0.0653447	0.0305682	15044	-19.352	3.99709
15043	0.0649084	0.0305614	15043	-19.3226	3.98547
15042	0.0644783	0.0305544	15042	-19.2929	3.97389
15041	0.0640542	0.0305473	15041	-19.2629	3.96235
15040	0.0636364	0.03054	15040	-19.2326	3.95086
15039	0.0632247	0.0305324	15039	-19.202	3.93941
15038	0.0628194	0.0305246	15038	-19.1712	3.92801
15037	0.0624203	0.0305166	15037	-19.1401	3.91667
15036	0.0620276	0.0305082	15036	-19.1087	3.90539
15035	0.0616413	0.0304997	15035	-19.077	3.89417
15034	0.0612615	0.0304908	15034	-19.045	3.88302
15033	0.0608882	0.0304816	15033	-19.0128	3.87193
15032	0.0605215	0.0304721	15032	-18.9803	3.86092
15031	0.0601613	0.0304622	15031	-18.9476	3.84999
15030	0.0598078	0.030452	15030	-18.9146	3.83913
15029	0.0594609	0.0304415	15029	-18.8814	3.82835
15028	0.0591206	0.0304306	15028	-18.8479	3.81766
15027	0.0587869	0.0304193	15027	-18.8143	3.80704
15026	0.0584599	0.0304077	15026	-18.7803	3.79651
15025	0.0581395	0.0303957	15025	-18.7462	3.78606
15024	0.0578257	0.0303834	15024	-18.7118	3.7757
15023	0.0575186	0.0303706	15023	-18.6773	3.76542
15022	0.0572182	0.0303576	15022	-18.6425	3.75523
15021	0.0569243	0.0303441	15021	-18.6076	3.74513
15020	0.0566372	0.0303302	15020	-18.5724	3.73512
15019	0.0563567	0.030316	15019	-18.5371	3.72521
15018	0.0560829	0.0303014	15018	-18.5016	3.71538
15017	0.0558158	0.0302864	15017	-18.4659	3.70564
15016	0.0555554	0.030271	15016	-18.4301	3.696
15015	0.0553016	0.0302552	15015	-18.3941	3.68645
15014	0.0550546	0.030239	15014	-18.358	3.67699
15013	0.0548142	0.0302225	15013	-18.3217	3.66763
15012	0.0545806	0.0302055	15012	-18.2853	3.65837
15011	0.0543536	0.0301881	15011	-18.2488	3.6492
15010	0.0541334	0.0301704	15010	-18.2121	3.64012
15009	0.0539199	0.0301522	15009	-18.1753	3.63114
15008	0.0537131	0.0301337	15008	-18.1384	3.62226
15007	0.053513	0.0301147	15007	-18.1014	3.61347
15006	0.0533197	0.0300953	15006	-18.0643	3.60478
15005	0.0531331	0.0300755	15005	-18.0272	3.59619
15004	0.0529533	0.0300554	15004	-17.9899	3.58769
15003	0.0527802	0.0300348	15003	-17.9525	3.57929
15002	0.0526139	0.0300138	15002	-17.9151	3.57099
[truncated: 2,002 more rows]
